# Supplementary material for: Membrane-mimetic thermal proteome profiling (MM-TPP) toward mapping membrane protein–ligand dynamic interactions
Source: eLife. 2025 Nov 12;14:RP104549. doi: 10.7554/eLife.104549 (PMC12611261; doi:10.7554/eLife.104549)
Supplement: Supplementary file 1. [file elife-104549-supp1.xlsx]

## Sheet: Index
Name	Description	Figure
ATP-VO4 51°C	Peptidisc reconstituted mouse liver control vs. ATP-VO4 51 °C MMTPP	Figure 3B-E, Figure 5A-C, Table 1, Table 2, Supplementary File 3
ATP-VO4 56°C	Peptidisc reconstituted mouse liver control vs. ATP-VO4 56 °C MMTPP	Figure 3D-E, Figure 5A-C, Table 1, Table 2, Supplementary File 3
ATP-VO4 60°C	Peptidisc reconstituted mouse liver control vs. ATP-VO4 60 °C MMTPP	Figure 3D-E, Figure 5A-C, Table 1, Table 2, Supplementary File 3
ATP-VO4 64°C	Peptidisc reconstituted mouse liver control vs. ATP-VO4 64 °C MMTPP	Figure 3D-E, Figure 5A-C, Table 1, Table 2, Figure 5-figure supplement 1, Supplementary File 3
AMP-PNP 51°C	Peptidisc reconstituted mouse liver control vs. AMP-PNP 51 °C MMTPP	Figure 3E, Figure 5B-C, Figure 3-figure supplement 1, Supplementary File 3
AMP-PNP 56°C	Peptidisc reconstituted mouse liver control vs. AMP-PNP 56 °C MMTPP	Figure 3E, Figure 5B-C, Supplementary File 3
AMP-PNP 60°C	Peptidisc reconstituted mouse liver control vs. AMP-PNP 60 °C MMTPP	Figure 3E, Figure 5B-C, Supplementary File 3
AMP-PNP 64°C	Peptidisc reconstituted mouse liver control vs. AMP-PNP 64 °C MMTPP	Figure 3E, Figure 5B-C, Supplementary File 3
E.COLI RT	Peptidisc reconstituted e coli control vs. ATP-VO4 RT MMTPP	Figure 2B
E.COLI 46°C	Peptidisc reconstituted e coli control vs. ATP-VO4 46 °C MMTPP	Figure 2B-C
E.COLI 51°C	Peptidisc reconstituted e coli control vs. ATP-VO4 51 °C MMTPP	Figure 2B-C, Supplementary File 3
E.COLI 56°C	Peptidisc reconstituted e coli control vs. ATP-VO4 56 °C MMTPP	Figure 2B-C, Supplementary File 3
E.COLI 61°C	Peptidisc reconstituted e coli control vs. ATP-VO4 61 °C MMTPP	Figure 2B-D, Supplementary File 3
MOUSE LIVER GRADIENT	Peptidisc reconstituted mouse liver heated for 3 minutes at RT, 45 °C, 50 °C, 55 °C, 60 °C, and 65 °C	Figure 3A, Supplementary File 2
SP4_ATPVO4_51C_Volcano	SP4 clean up of DDM solubilized mouse liver control vs. ATP-VO4 51 °C DBTPP	Figure 4A, Table 2, Supplementary File 3
SP4_ATPVO4_56C_Volcano	SP4 clean up of DDM solubilized mouse liver control vs. ATP-VO4 56 °C DBTPP	Table 2, Supplementary File 3
SP4_ATPVO4_60C_Volcano	SP4 clean up of DDM solubilized mouse liver control vs. ATP-VO4 60 °C DBTPP	Table 2, Supplementary File 3
SP4_ATPVO4_64_Volcano	SP4 clean up of DDM solubilized mouse liver control vs. ATP-VO4 64 °C DBTPP	Table 2, Supplementary File 3
2-MeS-ADP_51_Volcano	Peptidisc reconstituted mouse liver control vs. 2-MeS-ADP 51 °C MMTPP	Figure 4B, Supplementary File 3
2-MeS-ADP_57_Volcano	Peptidisc reconstituted mouse liver control vs. 2-MeS-ADP 57 °C MMTPP	Figure 4-figure supplement 1, Supplementary File 3
DIA_ATPVO4	Peptidisc reconstituted mouse liver control vs. ATP-VO4 51 °C MMTPP DIA analysis	Figure 5-figure supplement 2

## Sheet: ATP-VO4 51°C
Majority protein IDs	Entry Name	Protein names	Gene Names	TM	p-value (-log10)	Fold Difference (log2)	ATP-binding	Gene Ontology (biological process)	Gene Ontology (cellular component)	Gene Ontology (GO)	Gene Ontology (molecular function)	Subcellular location [CC]	Unique peptides 51.1 (-)	Unique peptides 51.2 (-)	Unique peptides 51.3 (-)	Unique peptides 51.1 (+)	Unique peptides 51.2 (+)	Unique peptides 51.3 (+)
Q4PNJ2	NKAI2_MOUSE	Sodium/potassium-transporting ATPase subunit beta-1-interacting protein 2 (Na(+)/K(+)-transporting ATPase subunit beta-1-interacting protein 2) (T-cell lymphoma breakpoint-associated target protein 1)	Nkain2	3	2.01071	1.00325	0	regulation of sodium ion transport [GO:0002028]	plasma membrane [GO:0005886]	plasma membrane [GO:0005886]; regulation of sodium ion transport [GO:0002028]		SUBCELLULAR LOCATION: Cell membrane {ECO:0000305}; Multi-pass membrane protein {ECO:0000305}.	7	7	7	5	5	5
P14094	AT1B1_MOUSE	Sodium/potassium-transporting ATPase subunit beta-1 (Sodium/potassium-dependent ATPase subunit beta-1)	Atp1b1	1	0.24817	0.0832348	1	ATP metabolic process [GO:0046034]; cardiac muscle contraction [GO:0060048]; cell adhesion [GO:0007155]; establishment or maintenance of transmembrane electrochemical gradient [GO:0010248]; intracellular calcium ion homeostasis [GO:0006874]; intracellular potassium ion homeostasis [GO:0030007]; intracellular sodium ion homeostasis [GO:0006883]; membrane repolarization [GO:0086009]; metal ion tran…	apical plasma membrane [GO:0016324]; basolateral plasma membrane [GO:0016323]; caveola [GO:0005901]; intercalated disc [GO:0014704]; lateral plasma membrane [GO:0016328]; membrane [GO:0016020]; myelin sheath [GO:0043209]; organelle membrane [GO:0031090]; plasma membrane [GO:0005886]; sarcolemma [GO:0042383]; sodium:potassium-exchanging ATPase complex [GO:0005890]; sperm flagellum [GO:0036126]; T-…	apical plasma membrane [GO:0016324]; basolateral plasma membrane [GO:0016323]; caveola [GO:0005901]; intercalated disc [GO:0014704]; lateral plasma membrane [GO:0016328]; membrane [GO:0016020]; myelin sheath [GO:0043209]; organelle membrane [GO:0031090]; plasma membrane [GO:0005886]; sarcolemma [GO:0042383]; sodium:potassium-exchanging ATPase complex [GO:0005890]; sperm flagellum [GO:0036126]; T-…	ATPase activator activity [GO:0001671]; ATPase binding [GO:0051117]; P-type sodium:potassium-exchanging transporter activity [GO:0005391]; protein heterodimerization activity [GO:0046982]; protein kinase binding [GO:0019901]; protein-macromolecule adaptor activity [GO:0030674]	SUBCELLULAR LOCATION: Cell membrane {ECO:0000255}; Single-pass type II membrane protein {ECO:0000255}. Apical cell membrane {ECO:0000250|UniProtKB:P07340}; Single-pass type II membrane protein {ECO:0000255}. Cell membrane, sarcolemma {ECO:0000269|PubMed:23392350}. Note=Colocalizes with OBSCN at the intercalated disk and sarcolemma in cardiomyocytes. Localizes in long striations at the level of Z …	11	11	10	12	13	10
P97370	AT1B3_MOUSE	Sodium/potassium-transporting ATPase subunit beta-3 (Sodium/potassium-dependent ATPase subunit beta-3) (ATPB-3) (CD antigen CD298)	Atp1b3	1	1.26186	0.635682	1	intracellular potassium ion homeostasis [GO:0030007]; intracellular sodium ion homeostasis [GO:0006883]; membrane repolarization [GO:0086009]; metal ion transport [GO:0030001]; positive regulation of potassium ion import across plasma membrane [GO:1903288]; positive regulation of sodium ion export across plasma membrane [GO:1903278]; potassium ion import across plasma membrane [GO:1990573]; potas…	apical plasma membrane [GO:0016324]; basolateral plasma membrane [GO:0016323]; caveola [GO:0005901]; cytoplasm [GO:0005737]; melanosome [GO:0042470]; plasma membrane [GO:0005886]; sodium:potassium-exchanging ATPase complex [GO:0005890]; sperm flagellum [GO:0036126]	apical plasma membrane [GO:0016324]; basolateral plasma membrane [GO:0016323]; caveola [GO:0005901]; cytoplasm [GO:0005737]; melanosome [GO:0042470]; plasma membrane [GO:0005886]; sodium:potassium-exchanging ATPase complex [GO:0005890]; sperm flagellum [GO:0036126]; ATPase activator activity [GO:0001671]; ATPase binding [GO:0051117]; P-type sodium:potassium-exchanging transporter activity [GO:000…	ATPase activator activity [GO:0001671]; ATPase binding [GO:0051117]; P-type sodium:potassium-exchanging transporter activity [GO:0005391]; protein-macromolecule adaptor activity [GO:0030674]	SUBCELLULAR LOCATION: Apical cell membrane {ECO:0000250|UniProtKB:Q63377}; Single-pass type II membrane protein {ECO:0000255}. Basolateral cell membrane {ECO:0000250|UniProtKB:Q63377}; Single-pass type II membrane protein {ECO:0000255}. Melanosome {ECO:0000250|UniProtKB:P54709}. Note=Identified by mass spectrometry in melanosome fractions from stage I to stage IV. {ECO:0000250|UniProtKB:P54709}.	5	4	3	4	7	6
Q8VDN2	AT1A1_MOUSE	Sodium/potassium-transporting ATPase subunit alpha-1 (Na(+)/K(+) ATPase alpha-1 subunit) (EC 7.2.2.13) (Sodium pump subunit alpha-1)	Atp1a1	8	1.59567	0.512208	1	cellular response to mechanical stimulus [GO:0071260]; cellular response to steroid hormone stimulus [GO:0071383]; establishment or maintenance of transmembrane electrochemical gradient [GO:0010248]; heart contraction [GO:0060047]; intracellular potassium ion homeostasis [GO:0030007]; intracellular sodium ion homeostasis [GO:0006883]; membrane hyperpolarization [GO:0060081]; membrane repolarizati…	apical plasma membrane [GO:0016324]; axon [GO:0030424]; basolateral plasma membrane [GO:0016323]; caveola [GO:0005901]; endoplasmic reticulum [GO:0005783]; endosome [GO:0005768]; Golgi apparatus [GO:0005794]; intercalated disc [GO:0014704]; lateral plasma membrane [GO:0016328]; melanosome [GO:0042470]; membrane [GO:0016020]; myelin sheath [GO:0043209]; organelle membrane [GO:0031090]; plasma memb…	apical plasma membrane [GO:0016324]; axon [GO:0030424]; basolateral plasma membrane [GO:0016323]; caveola [GO:0005901]; endoplasmic reticulum [GO:0005783]; endosome [GO:0005768]; Golgi apparatus [GO:0005794]; intercalated disc [GO:0014704]; lateral plasma membrane [GO:0016328]; melanosome [GO:0042470]; membrane [GO:0016020]; myelin sheath [GO:0043209]; organelle membrane [GO:0031090]; plasma memb…	ADP binding [GO:0043531]; ankyrin binding [GO:0030506]; ATP binding [GO:0005524]; ATP hydrolysis activity [GO:0016887]; P-type sodium:potassium-exchanging transporter activity [GO:0005391]; phosphatase activity [GO:0016791]; phosphatidylinositol 3-kinase binding [GO:0043548]; potassium ion binding [GO:0030955]; protein domain specific binding [GO:0019904]; protein heterodimerization activity [GO:…	SUBCELLULAR LOCATION: Cell membrane {ECO:0000269|PubMed:17408578}; Multi-pass membrane protein {ECO:0000255}. Basolateral cell membrane {ECO:0000250|UniProtKB:P06685}; Multi-pass membrane protein {ECO:0000255}. Cell membrane, sarcolemma {ECO:0000250|UniProtKB:P05023}; Multi-pass membrane protein {ECO:0000255}. Cell projection, axon {ECO:0000250|UniProtKB:P06685}. Melanosome {ECO:0000250|UniProtKB…	40	40	40	39	38	36
Q9CZM9	KCMB2_MOUSE	Calcium-activated potassium channel subunit beta-2 (BK channel subunit beta-2) (BKbeta2) (Calcium-activated potassium channel, subfamily M subunit beta-2) (Charybdotoxin receptor subunit beta-2) (K(VCA)beta-2) (Maxi K channel subunit beta-2) (Slo-beta-2)	Kcnmb2	2	0.711717	0.333717	0	action potential [GO:0001508]; detection of calcium ion [GO:0005513]; neuronal action potential [GO:0019228]; potassium ion transport [GO:0006813]	plasma membrane [GO:0005886]; voltage-gated potassium channel complex [GO:0008076]	plasma membrane [GO:0005886]; voltage-gated potassium channel complex [GO:0008076]; calcium-activated potassium channel activity [GO:0015269]; potassium channel activity [GO:0005267]; potassium channel regulator activity [GO:0015459]; action potential [GO:0001508]; detection of calcium ion [GO:0005513]; neuronal action potential [GO:0019228]; potassium ion transport [GO:0006813]	calcium-activated potassium channel activity [GO:0015269]; potassium channel activity [GO:0005267]; potassium channel regulator activity [GO:0015459]	SUBCELLULAR LOCATION: Membrane {ECO:0000250}; Multi-pass membrane protein {ECO:0000250}.	2	3	3	2	3	2
Q925Q3	NCLX_MOUSE	Mitochondrial sodium/calcium exchanger protein (Na(+)/K(+)/Ca(2+)-exchange protein 6) (Sodium/calcium exchanger protein, mitochondrial) (Sodium/potassium/calcium exchanger 6) (Solute carrier family 24 member 6) (Solute carrier family 8 member B1)	Slc8b1	12	1.81575	1.3949	0	calcium export from the mitochondrion [GO:0099093]; calcium ion transmembrane transport [GO:0070588]; glucose homeostasis [GO:0042593]; intracellular calcium ion homeostasis [GO:0006874]; mitochondrial calcium ion homeostasis [GO:0051560]; mitochondrial calcium ion transmembrane transport [GO:0006851]; regulation of cardiac muscle cell membrane potential [GO:0086036]; regulation of cytosolic calc…	membrane [GO:0016020]; mitochondrial crista [GO:0030061]; mitochondrial inner membrane [GO:0005743]; mitochondrial membrane [GO:0031966]; mitochondrion [GO:0005739]; plasma membrane [GO:0005886]; sarcolemma [GO:0042383]	membrane [GO:0016020]; mitochondrial crista [GO:0030061]; mitochondrial inner membrane [GO:0005743]; mitochondrial membrane [GO:0031966]; mitochondrion [GO:0005739]; plasma membrane [GO:0005886]; sarcolemma [GO:0042383]; calcium:sodium antiporter activity [GO:0005432]; calcium:sodium antiporter activity involved in regulation of cardiac muscle cell membrane potential [GO:0086038]; identical prote…	calcium:sodium antiporter activity [GO:0005432]; calcium:sodium antiporter activity involved in regulation of cardiac muscle cell membrane potential [GO:0086038]; identical protein binding [GO:0042802]; protein homodimerization activity [GO:0042803]	SUBCELLULAR LOCATION: Mitochondrion inner membrane {ECO:0000269|PubMed:20018762, ECO:0000269|PubMed:24067497}; Multi-pass membrane protein {ECO:0000269|PubMed:20018762}. Note=Mainly localizes to mitochondrion inner membrane (PubMed:20018762).; SUBCELLULAR LOCATION: [Isoform 2]: Cell membrane {ECO:0000269|PubMed:14625281}; Multi-pass membrane protein {ECO:0000269|PubMed:14625281}.	3	1	3	5	8	6
P08752	GNAI2_MOUSE	Guanine nucleotide-binding protein G(i) subunit alpha-2 (Adenylate cyclase-inhibiting G alpha protein)	Gnai2	0	1.86331	0.846164	0	adenylate cyclase-activating G protein-coupled receptor signaling pathway [GO:0007189]; adenylate cyclase-inhibiting G protein-coupled receptor signaling pathway [GO:0007193]; cell cycle [GO:0007049]; cell division [GO:0051301]; cell population proliferation [GO:0008283]; G protein-coupled acetylcholine receptor signaling pathway [GO:0007213]; G protein-coupled adenosine receptor signaling pathwa…	cell body [GO:0044297]; centrosome [GO:0005813]; cytoplasm [GO:0005737]; cytosol [GO:0005829]; dendrite [GO:0030425]; heterotrimeric G-protein complex [GO:0005834]; midbody [GO:0030496]; neuronal dense core vesicle [GO:0098992]; nucleoplasm [GO:0005654]; plasma membrane [GO:0005886]; synapse [GO:0045202]	cell body [GO:0044297]; centrosome [GO:0005813]; cytoplasm [GO:0005737]; cytosol [GO:0005829]; dendrite [GO:0030425]; heterotrimeric G-protein complex [GO:0005834]; midbody [GO:0030496]; neuronal dense core vesicle [GO:0098992]; nucleoplasm [GO:0005654]; plasma membrane [GO:0005886]; synapse [GO:0045202]; G protein-coupled receptor binding [GO:0001664]; G-protein beta/gamma-subunit complex bindin…	G protein-coupled receptor binding [GO:0001664]; G-protein beta/gamma-subunit complex binding [GO:0031683]; GTP binding [GO:0005525]; GTPase activity [GO:0003924]; metal ion binding [GO:0046872]	SUBCELLULAR LOCATION: Cytoplasm {ECO:0000250}. Cytoplasm, cytoskeleton, microtubule organizing center, centrosome {ECO:0000250}. Cell membrane {ECO:0000250}. Membrane {ECO:0000250|UniProtKB:P04899}; Lipid-anchor {ECO:0000250|UniProtKB:P04899}. Note=Localizes in the centrosomes of interphase and mitotic cells. Detected at the cleavage furrow and/or the midbody (By similarity). {ECO:0000250}.	5	4	3	6	6	5
Q9DC51	GNAI3_MOUSE	Guanine nucleotide-binding protein G(i) subunit alpha-3 (G(i) alpha-3)	Gnai3	0	1.7187	1.4147	0	adenylate cyclase-inhibiting G protein-coupled receptor signaling pathway [GO:0007193]; adenylate cyclase-modulating G protein-coupled receptor signaling pathway [GO:0007188]; cell cycle [GO:0007049]; cell division [GO:0051301]; dopamine receptor signaling pathway [GO:0007212]; G protein-coupled receptor signaling pathway [GO:0007186]; GTP metabolic process [GO:0046039]; negative regulation of ap…	centrosome [GO:0005813]; cytoplasm [GO:0005737]; endoplasmic reticulum membrane [GO:0005789]; Golgi apparatus [GO:0005794]; Golgi membrane [GO:0000139]; heterotrimeric G-protein complex [GO:0005834]; midbody [GO:0030496]; nucleolus [GO:0005730]; nucleoplasm [GO:0005654]; plasma membrane [GO:0005886]; zymogen granule [GO:0042588]	centrosome [GO:0005813]; cytoplasm [GO:0005737]; endoplasmic reticulum membrane [GO:0005789]; Golgi apparatus [GO:0005794]; Golgi membrane [GO:0000139]; heterotrimeric G-protein complex [GO:0005834]; midbody [GO:0030496]; nucleolus [GO:0005730]; nucleoplasm [GO:0005654]; plasma membrane [GO:0005886]; zymogen granule [GO:0042588]; G protein-coupled receptor binding [GO:0001664]; G protein-coupled …	G protein-coupled receptor binding [GO:0001664]; G protein-coupled serotonin receptor binding [GO:0031821]; G-protein beta/gamma-subunit complex binding [GO:0031683]; GDP binding [GO:0019003]; GTP binding [GO:0005525]; GTPase activating protein binding [GO:0032794]; GTPase activity [GO:0003924]; metal ion binding [GO:0046872]; protein domain specific binding [GO:0019904]	SUBCELLULAR LOCATION: Cytoplasm {ECO:0000250|UniProtKB:P08754}. Cell membrane {ECO:0000250|UniProtKB:P08754}; Lipid-anchor {ECO:0000305}. Cytoplasm, cytoskeleton, microtubule organizing center, centrosome {ECO:0000250|UniProtKB:P08754}. Note=Localizes in the centrosomes of interphase and mitotic cells. Detected at the cleavage furrow and/or the midbody. {ECO:0000250|UniProtKB:P08754}.	1	1	1	2	4	2
Q9CQW2	ARL8B_MOUSE	ADP-ribosylation factor-like protein 8B (EC 3.6.5.2) (ADP-ribosylation factor-like protein 10C) (Novel small G protein indispensable for equal chromosome segregation 1)	Arl8b	0	0.810507	0.513365	0	anterograde axonal transport [GO:0008089]; antigen processing and presentation following phagocytosis [GO:0002747]; antigen processing and presentation of polysaccharide antigen via MHC class II [GO:0002505]; autophagosome-lysosome fusion [GO:0061909]; calcium ion regulated lysosome exocytosis [GO:1990927]; cell division [GO:0051301]; chromosome segregation [GO:0007059]; endosomal transport [GO:0…	axon [GO:0030424]; axon cytoplasm [GO:1904115]; cytolytic granule membrane [GO:0101004]; cytoplasm [GO:0005737]; cytosol [GO:0005829]; late endosome membrane [GO:0031902]; lysosomal membrane [GO:0005765]; lysosome [GO:0005764]; midbody [GO:0030496]; spindle midzone [GO:0051233]; synapse [GO:0045202]	axon [GO:0030424]; axon cytoplasm [GO:1904115]; cytolytic granule membrane [GO:0101004]; cytoplasm [GO:0005737]; cytosol [GO:0005829]; late endosome membrane [GO:0031902]; lysosomal membrane [GO:0005765]; lysosome [GO:0005764]; midbody [GO:0030496]; spindle midzone [GO:0051233]; synapse [GO:0045202]; alpha-tubulin binding [GO:0043014]; beta-tubulin binding [GO:0048487]; G protein activity [GO:000…	alpha-tubulin binding [GO:0043014]; beta-tubulin binding [GO:0048487]; G protein activity [GO:0003925]; GDP binding [GO:0019003]; GTP binding [GO:0005525]	SUBCELLULAR LOCATION: Late endosome membrane {ECO:0000250|UniProtKB:Q9NVJ2}. Lysosome membrane {ECO:0000269|PubMed:21802320, ECO:0000269|PubMed:25637027, ECO:0000269|PubMed:30174114, ECO:0000269|PubMed:33157038}. Cytoplasm, cytoskeleton, spindle {ECO:0000250|UniProtKB:Q9NVJ2}. Cell projection, axon {ECO:0000269|PubMed:30174114}. Synapse {ECO:0000269|PubMed:30174114}. Cytolytic granule membrane {E…	1	1	1	3	1	2
P60766	CDC42_MOUSE	Cell division control protein 42 homolog (EC 3.6.5.2) (G25K GTP-binding protein)	Cdc42	0	2.79392	1.22038	0	actin cytoskeleton organization [GO:0030036]; actin filament branching [GO:0090135]; actin filament organization [GO:0007015]; adherens junction organization [GO:0034332]; cardiac conduction system development [GO:0003161]; cardiac neural crest cell migration involved in outflow tract morphogenesis [GO:0003253]; Cdc42 protein signal transduction [GO:0032488]; cell junction assembly [GO:0034329]; …	apical part of cell [GO:0045177]; cell leading edge [GO:0031252]; cell periphery [GO:0071944]; cell projection [GO:0042995]; cell-cell junction [GO:0005911]; centrosome [GO:0005813]; cytoplasm [GO:0005737]; cytoplasmic ribonucleoprotein granule [GO:0036464]; cytosol [GO:0005829]; dendritic spine [GO:0043197]; filopodium [GO:0030175]; glutamatergic synapse [GO:0098978]; Golgi membrane [GO:0000139]…	apical part of cell [GO:0045177]; cell leading edge [GO:0031252]; cell periphery [GO:0071944]; cell projection [GO:0042995]; cell-cell junction [GO:0005911]; centrosome [GO:0005813]; cytoplasm [GO:0005737]; cytoplasmic ribonucleoprotein granule [GO:0036464]; cytosol [GO:0005829]; dendritic spine [GO:0043197]; filopodium [GO:0030175]; glutamatergic synapse [GO:0098978]; Golgi membrane [GO:0000139]…	apolipoprotein A-I receptor binding [GO:0034191]; G protein activity [GO:0003925]; GBD domain binding [GO:0032427]; GTP binding [GO:0005525]; GTP-dependent protein binding [GO:0030742]; GTPase activity [GO:0003924]; identical protein binding [GO:0042802]; mitogen-activated protein kinase kinase kinase binding [GO:0031435]; protein kinase binding [GO:0019901]; thioesterase binding [GO:0031996]; ub…	SUBCELLULAR LOCATION: Cell membrane {ECO:0000269|PubMed:22461490, ECO:0000269|PubMed:30185885}; Lipid-anchor {ECO:0000305}; Cytoplasmic side {ECO:0000305}. Midbody {ECO:0000250|UniProtKB:P60953}. Cytoplasm, cytoskeleton, microtubule organizing center, centrosome {ECO:0000250|UniProtKB:P60953}. Cytoplasm, cytoskeleton, spindle {ECO:0000250|UniProtKB:P60953}. Cytoplasm {ECO:0000269|PubMed:22461490}…	2	3	3	3	3	3
G3X9R9	G3X9R9_MOUSE	G protein-coupled receptor 182	Gpr182	7	2.88458	3.25243	0		plasma membrane [GO:0005886]	plasma membrane [GO:0005886]; G protein-coupled receptor activity [GO:0004930]	G protein-coupled receptor activity [GO:0004930]	SUBCELLULAR LOCATION: Cell membrane {ECO:0000256|ARBA:ARBA00004651}; Multi-pass membrane protein {ECO:0000256|ARBA:ARBA00004651}. Membrane {ECO:0000256|ARBA:ARBA00004141}; Multi-pass membrane protein {ECO:0000256|ARBA:ARBA00004141}.	0	0	0	1	1	2
Q99JI6	RAP1B_MOUSE	Ras-related protein Rap-1b (EC 3.6.5.2) (GTP-binding protein smg p21B)	Rap1b	0	1.61104	-1.24779	0	calcium-ion regulated exocytosis [GO:0017156]; cell population proliferation [GO:0008283]; cellular response to cAMP [GO:0071320]; cellular response to organic cyclic compound [GO:0071407]; cellular response to xenobiotic stimulus [GO:0071466]; establishment of endothelial barrier [GO:0061028]; establishment of localization in cell [GO:0051649]; modification of postsynaptic structure [GO:0099010]…	cell-cell junction [GO:0005911]; cytosol [GO:0005829]; glutamatergic synapse [GO:0098978]; lipid droplet [GO:0005811]; plasma membrane [GO:0005886]	cell-cell junction [GO:0005911]; cytosol [GO:0005829]; glutamatergic synapse [GO:0098978]; lipid droplet [GO:0005811]; plasma membrane [GO:0005886]; G protein activity [GO:0003925]; GDP binding [GO:0019003]; GTP binding [GO:0005525]; GTPase activity [GO:0003924]; protein-containing complex binding [GO:0044877]; calcium-ion regulated exocytosis [GO:0017156]; cell population proliferation [GO:00082…	G protein activity [GO:0003925]; GDP binding [GO:0019003]; GTP binding [GO:0005525]; GTPase activity [GO:0003924]; protein-containing complex binding [GO:0044877]	SUBCELLULAR LOCATION: Cell membrane {ECO:0000250|UniProtKB:P61224}. Cytoplasm, cytosol {ECO:0000250|UniProtKB:P61224}. Cell junction {ECO:0000250|UniProtKB:P61224}. Note=May shuttle between plasma membrane and cytosol (By similarity). Presence of KRIT1 and CDH5 is required for its localization to the cell junction (By similarity). {ECO:0000250|UniProtKB:P61224}.	3	2	2	1	1	1
P41241	CSK_MOUSE	Tyrosine-protein kinase CSK (EC 2.7.10.2) (C-Src kinase) (Protein-tyrosine kinase MPK-2) (p50CSK)	Csk	0	0.673415	0.281483	1	adaptive immune response [GO:0002250]; adherens junction organization [GO:0034332]; cellular response to peptide hormone stimulus [GO:0071375]; intracellular signal transduction [GO:0035556]; negative regulation of bone resorption [GO:0045779]; negative regulation of cell population proliferation [GO:0008285]; negative regulation of ERK1 and ERK2 cascade [GO:0070373]; negative regulation of Golgi…	cell-cell junction [GO:0005911]; cytoplasm [GO:0005737]; plasma membrane [GO:0005886]	cell-cell junction [GO:0005911]; cytoplasm [GO:0005737]; plasma membrane [GO:0005886]; ATP binding [GO:0005524]; identical protein binding [GO:0042802]; metal ion binding [GO:0046872]; non-membrane spanning protein tyrosine kinase activity [GO:0004715]; proline-rich region binding [GO:0070064]; protein kinase A catalytic subunit binding [GO:0034236]; protein phosphatase binding [GO:0019903]; prot…	ATP binding [GO:0005524]; identical protein binding [GO:0042802]; metal ion binding [GO:0046872]; non-membrane spanning protein tyrosine kinase activity [GO:0004715]; proline-rich region binding [GO:0070064]; protein kinase A catalytic subunit binding [GO:0034236]; protein phosphatase binding [GO:0019903]; protein tyrosine kinase activity [GO:0004713]; protein tyrosine kinase binding [GO:1990782]…	SUBCELLULAR LOCATION: Cytoplasm {ECO:0000269|PubMed:16166631}. Cell membrane {ECO:0000269|PubMed:16166631}. Note=Mainly cytoplasmic, also present in lipid rafts.	9	9	8	8	8	7
P63037	DNJA1_MOUSE	DnaJ homolog subfamily A member 1 (DnaJ protein homolog 2) (Heat shock 40 kDa protein 4) (Heat shock protein J2) (HSJ-2)	Dnaja1	0	0.866803	0.555332	1	androgen receptor signaling pathway [GO:0030521]; flagellated sperm motility [GO:0030317]; negative regulation of apoptotic process [GO:0043066]; negative regulation of establishment of protein localization to mitochondrion [GO:1903748]; negative regulation of JUN kinase activity [GO:0043508]; negative regulation of nitrosative stress-induced intrinsic apoptotic signaling pathway [GO:1905259]; ne…	cytoplasm [GO:0005737]; cytosol [GO:0005829]; endoplasmic reticulum [GO:0005783]; membrane [GO:0016020]; microtubule cytoskeleton [GO:0015630]; mitochondrion [GO:0005739]; nucleus [GO:0005634]; perinuclear region of cytoplasm [GO:0048471]	cytoplasm [GO:0005737]; cytosol [GO:0005829]; endoplasmic reticulum [GO:0005783]; membrane [GO:0016020]; microtubule cytoskeleton [GO:0015630]; mitochondrion [GO:0005739]; nucleus [GO:0005634]; perinuclear region of cytoplasm [GO:0048471]; ATP binding [GO:0005524]; ATPase activator activity [GO:0001671]; C3HC4-type RING finger domain binding [GO:0055131]; G protein-coupled receptor binding [GO:00…	ATP binding [GO:0005524]; ATPase activator activity [GO:0001671]; C3HC4-type RING finger domain binding [GO:0055131]; G protein-coupled receptor binding [GO:0001664]; Hsp70 protein binding [GO:0030544]; low-density lipoprotein particle receptor binding [GO:0050750]; metal ion binding [GO:0046872]; protein-folding chaperone binding [GO:0051087]; Tat protein binding [GO:0030957]; ubiquitin protein …	SUBCELLULAR LOCATION: Membrane {ECO:0000250}; Lipid-anchor {ECO:0000250}. Cytoplasm {ECO:0000250}. Microsome {ECO:0000250}. Mitochondrion {ECO:0000250}. Nucleus {ECO:0000250}. Cytoplasm, perinuclear region {ECO:0000250}. Note=Primarily cytoplasmic and associated with microsomes. A minor proportion is associated with nuclei and mitochondria (By similarity). {ECO:0000250}.	1	1	1	2	3	3
P08103	HCK_MOUSE	Tyrosine-protein kinase HCK (EC 2.7.10.2) (B-cell/myeloid kinase) (BMK) (Hematopoietic cell kinase) (Hemopoietic cell kinase) (p56-HCK/p59-HCK)	Hck	0	1.11508	0.730661	1	cell differentiation [GO:0030154]; defense response to Gram-positive bacterium [GO:0050830]; exocytosis [GO:0006887]; inflammatory response [GO:0006954]; innate immune response [GO:0045087]; intracellular signal transduction [GO:0035556]; localization [GO:0051179]; negative regulation of apoptotic process [GO:0043066]; peptidyl-tyrosine phosphorylation [GO:0018108]; phagocytosis [GO:0006909]; pos…	caveola [GO:0005901]; cell projection [GO:0042995]; cytoplasmic side of plasma membrane [GO:0009898]; cytoskeleton [GO:0005856]; cytosol [GO:0005829]; extrinsic component of cytoplasmic side of plasma membrane [GO:0031234]; focal adhesion [GO:0005925]; Golgi apparatus [GO:0005794]; intracellular membrane-bounded organelle [GO:0043231]; lysosome [GO:0005764]; nucleus [GO:0005634]; plasma membrane …	caveola [GO:0005901]; cell projection [GO:0042995]; cytoplasmic side of plasma membrane [GO:0009898]; cytoskeleton [GO:0005856]; cytosol [GO:0005829]; extrinsic component of cytoplasmic side of plasma membrane [GO:0031234]; focal adhesion [GO:0005925]; Golgi apparatus [GO:0005794]; intracellular membrane-bounded organelle [GO:0043231]; lysosome [GO:0005764]; nucleus [GO:0005634]; plasma membrane …	ATP binding [GO:0005524]; lipid binding [GO:0008289]; non-membrane spanning protein tyrosine kinase activity [GO:0004715]; phosphotyrosine residue binding [GO:0001784]; protein tyrosine kinase activity [GO:0004713]; signaling receptor binding [GO:0005102]	SUBCELLULAR LOCATION: Cytoplasmic vesicle, secretory vesicle {ECO:0000250}. Cytoplasm, cytosol {ECO:0000250}.; SUBCELLULAR LOCATION: [Isoform 1]: Membrane; Lipid-anchor. Membrane, caveola {ECO:0000250}. Lysosome {ECO:0000250}. Cell projection, podosome membrane {ECO:0000250}; Lipid-anchor {ECO:0000250}. Cytoplasm, cytosol {ECO:0000250}. Note=Associated with specialized secretory lysosomes called …	1	3	3	3	2	3
P63017	HSP7C_MOUSE	Heat shock cognate 71 kDa protein (EC 3.6.4.10) (Heat shock 70 kDa protein 8)	Hspa8	0	3.40724	1.52373	1	ATP metabolic process [GO:0046034]; cellular response to cadmium ion [GO:0071276]; cellular response to heat [GO:0034605]; cellular response to hydrogen peroxide [GO:0070301]; cerebellum development [GO:0021549]; chaperone cofactor-dependent protein refolding [GO:0051085]; chaperone-mediated autophagy [GO:0061684]; chaperone-mediated autophagy translocation complex disassembly [GO:1904764]; chape…	asymmetric synapse [GO:0032279]; autophagosome [GO:0005776]; axon [GO:0030424]; cell surface [GO:0009986]; cytoplasm [GO:0005737]; cytosol [GO:0005829]; dendrite [GO:0030425]; dendritic shaft [GO:0043198]; dendritic spine [GO:0043197]; extracellular exosome [GO:0070062]; glutamatergic synapse [GO:0098978]; glycinergic synapse [GO:0098690]; intermediate filament [GO:0005882]; late endosome [GO:000…	asymmetric synapse [GO:0032279]; autophagosome [GO:0005776]; axon [GO:0030424]; cell surface [GO:0009986]; cytoplasm [GO:0005737]; cytosol [GO:0005829]; dendrite [GO:0030425]; dendritic shaft [GO:0043198]; dendritic spine [GO:0043197]; extracellular exosome [GO:0070062]; glutamatergic synapse [GO:0098978]; glycinergic synapse [GO:0098690]; intermediate filament [GO:0005882]; late endosome [GO:000…	A1 adenosine receptor binding [GO:0031686]; ADP binding [GO:0043531]; ATP binding [GO:0005524]; ATP hydrolysis activity [GO:0016887]; ATP-dependent protein disaggregase activity [GO:0140545]; ATP-dependent protein folding chaperone [GO:0140662]; C3HC4-type RING finger domain binding [GO:0055131]; clathrin-uncoating ATPase activity [GO:1990833]; enzyme binding [GO:0019899]; G protein-coupled recep…	SUBCELLULAR LOCATION: Cytoplasm {ECO:0000250|UniProtKB:P11142}. Melanosome {ECO:0000250|UniProtKB:P11142}. Nucleus, nucleolus {ECO:0000250|UniProtKB:P11142}. Cell membrane {ECO:0000250|UniProtKB:P11142}. Lysosome membrane {ECO:0000250|UniProtKB:P11142}; Peripheral membrane protein {ECO:0000250|UniProtKB:P11142}; Cytoplasmic side {ECO:0000250|UniProtKB:P11142}. Note=Localized in cytoplasmic mRNP g…	23	22	22	22	25	24
Q8K209	AGRG1_MOUSE	Adhesion G-protein coupled receptor G1 (G-protein coupled receptor 56) (Serpentine receptor cyt28) [Cleaved into: ADGRG1 N-terminal fragment (ADGRG1 NT) (GPR56 N-terminal fragment) (GPR56 NT) (GPR56(N)) (GPR56 extracellular subunit) (GPR56 subunit alpha); ADGRG1 C-terminal fragment (ADGRG1-CT) (GPR56 C-terminal fragment) (GPR56 CT) (GPR56(C)) (GPR56 seven-transmembrane subunit) (GPR56 7TM) (GPR56…	Adgrg1	7	1.59057	1.18062	0	adenylate cyclase-activating G protein-coupled receptor signaling pathway [GO:0007189]; angiogenesis [GO:0001525]; brain development [GO:0007420]; cell adhesion [GO:0007155]; cell migration [GO:0016477]; cell surface receptor signaling pathway [GO:0007166]; cerebral cortex radial glia-guided migration [GO:0021801]; cerebral cortex regionalization [GO:0021796]; hematopoietic stem cell homeostasis …	extracellular region [GO:0005576]; glial limiting end-foot [GO:0097451]; membrane raft [GO:0045121]; plasma membrane [GO:0005886]	extracellular region [GO:0005576]; glial limiting end-foot [GO:0097451]; membrane raft [GO:0045121]; plasma membrane [GO:0005886]; collagen binding [GO:0005518]; extracellular matrix binding [GO:0050840]; G protein-coupled receptor activity [GO:0004930]; heparin binding [GO:0008201]; adenylate cyclase-activating G protein-coupled receptor signaling pathway [GO:0007189]; angiogenesis [GO:0001525];…	collagen binding [GO:0005518]; extracellular matrix binding [GO:0050840]; G protein-coupled receptor activity [GO:0004930]; heparin binding [GO:0008201]	SUBCELLULAR LOCATION: Cell membrane {ECO:0000269|PubMed:17576745, ECO:0000269|PubMed:22238662}; Multi-pass membrane protein {ECO:0000255}.; SUBCELLULAR LOCATION: [ADGRG1 N-terminal fragment]: Secreted {ECO:0000250|UniProtKB:Q9Y653}.; SUBCELLULAR LOCATION: [ADGRG1 C-terminal fragment]: Membrane raft {ECO:0000250|UniProtKB:Q9Y653}. Note=Interaction with its ligand COL3A1 leads to the release of ADG…	12	13	8	14	10	9
Q8VHN7	AGRV1_MOUSE	Adhesion G-protein coupled receptor V1 (ADGRV1) (EC 3.4.-.-) (G-protein coupled receptor 98) (Monogenic audiogenic seizure susceptibility protein 1) (MASS1) (Neurepin) (Protein rueda) (Very large G-protein coupled receptor 1) (VLGR1) [Cleaved into: ADGRV1 subunit alpha; ADGRV1 subunit beta (VLGR1 subunit beta) (Vbeta)]	Adgrv1	7	1.72727	1.32369	0	cell surface receptor signaling pathway [GO:0007166]; cell-cell adhesion [GO:0098609]; cellular response to calcium ion [GO:0071277]; detection of mechanical stimulus involved in sensory perception of sound [GO:0050910]; establishment of localization in cell [GO:0051649]; establishment of protein localization [GO:0045184]; inner ear development [GO:0048839]; inner ear receptor cell differentiatio…	cell surface [GO:0009986]; cytoplasm [GO:0005737]; extracellular region [GO:0005576]; membrane [GO:0016020]; periciliary membrane compartment [GO:1990075]; perinuclear region of cytoplasm [GO:0048471]; photoreceptor connecting cilium [GO:0032391]; photoreceptor inner segment [GO:0001917]; plasma membrane [GO:0005886]; receptor complex [GO:0043235]; stereocilia ankle link [GO:0002141]; stereocilia…	cell surface [GO:0009986]; cytoplasm [GO:0005737]; extracellular region [GO:0005576]; membrane [GO:0016020]; periciliary membrane compartment [GO:1990075]; perinuclear region of cytoplasm [GO:0048471]; photoreceptor connecting cilium [GO:0032391]; photoreceptor inner segment [GO:0001917]; plasma membrane [GO:0005886]; receptor complex [GO:0043235]; stereocilia ankle link [GO:0002141]; stereocilia…	adenylate cyclase inhibitor activity [GO:0010855]; calcium ion binding [GO:0005509]; G protein-coupled receptor activity [GO:0004930]; G-protein alpha-subunit binding [GO:0001965]; hydrolase activity [GO:0016787]; myosin binding [GO:0017022]	SUBCELLULAR LOCATION: Cell membrane {ECO:0000269|PubMed:15606908}; Multi-pass membrane protein {ECO:0000269|PubMed:15606908}. Cell projection, stereocilium membrane {ECO:0000269|PubMed:16775142, ECO:0000269|PubMed:17567809, ECO:0000269|PubMed:20502675, ECO:0000269|PubMed:24334608, ECO:0000269|PubMed:27525485}. Photoreceptor inner segment {ECO:0000269|PubMed:20502675, ECO:0000269|PubMed:24334608}.…	2	2	1	3	4	3
P29699	FETUA_MOUSE	Alpha-2-HS-glycoprotein (Countertrypin) (Fetuin-A)	Ahsg	0	1.01293	0.503763	0	acute-phase response [GO:0006953]; male gonad development [GO:0008584]; negative regulation of bone mineralization [GO:0030502]; negative regulation of cell growth [GO:0030308]; negative regulation of insulin receptor signaling pathway [GO:0046627]; ossification [GO:0001503]; positive regulation of bone resorption [GO:0045780]; positive regulation of phagocytosis [GO:0050766]; protein-containing …	collagen-containing extracellular matrix [GO:0062023]; extracellular matrix [GO:0031012]; extracellular region [GO:0005576]; extracellular space [GO:0005615]; Golgi apparatus [GO:0005794]; protein-containing complex [GO:0032991]	collagen-containing extracellular matrix [GO:0062023]; extracellular matrix [GO:0031012]; extracellular region [GO:0005576]; extracellular space [GO:0005615]; Golgi apparatus [GO:0005794]; protein-containing complex [GO:0032991]; cysteine-type endopeptidase inhibitor activity [GO:0004869]; endopeptidase inhibitor activity [GO:0004866]; receptor signaling protein tyrosine kinase inhibitor activity…	cysteine-type endopeptidase inhibitor activity [GO:0004869]; endopeptidase inhibitor activity [GO:0004866]; receptor signaling protein tyrosine kinase inhibitor activity [GO:0030294]	SUBCELLULAR LOCATION: Secreted.	9	9	8	9	8	7
Q8K087	CML2_MOUSE	Chemerin-like receptor 2 (Chemerin chemokine-like receptor 2) (Chemokine-like receptor 2) (G-protein coupled receptor 1)	Cmklr2	7	0.155232	0.133376	0	glucose homeostasis [GO:0042593]; neuropeptide signaling pathway [GO:0007218]	intracellular membrane-bounded organelle [GO:0043231]; neuron projection [GO:0043005]; nucleoplasm [GO:0005654]; plasma membrane [GO:0005886]	intracellular membrane-bounded organelle [GO:0043231]; neuron projection [GO:0043005]; nucleoplasm [GO:0005654]; plasma membrane [GO:0005886]; adipokinetic hormone binding [GO:0097004]; adipokinetic hormone receptor activity [GO:0097003]; G protein-coupled receptor activity [GO:0004930]; neuropeptide binding [GO:0042923]; glucose homeostasis [GO:0042593]; neuropeptide signaling pathway [GO:000721…	adipokinetic hormone binding [GO:0097004]; adipokinetic hormone receptor activity [GO:0097003]; G protein-coupled receptor activity [GO:0004930]; neuropeptide binding [GO:0042923]	SUBCELLULAR LOCATION: Cell membrane {ECO:0000269|PubMed:29799787}; Multi-pass membrane protein {ECO:0000255}. Note=Internalizes in presence of its ligand, TAFA1 (PubMed:29799787). Internalizes efficiently in response to RARRES2 (By similarity). {ECO:0000250|UniProtKB:P46091, ECO:0000269|PubMed:29799787}.	6	5	8	9	7	8
Q9EQX0	GHRL_MOUSE	Appetite-regulating hormone (Growth hormone secretagogue) (Growth hormone-releasing peptide) (Motilin-related peptide) (Protein M46) [Cleaved into: Ghrelin; Obestatin]	Ghrl	0	1.69079	0.578377	0	actin polymerization or depolymerization [GO:0008154]; adult feeding behavior [GO:0008343]; decidualization [GO:0046697]; dendrite development [GO:0016358]; excitatory postsynaptic potential [GO:0060079]; G protein-coupled receptor signaling pathway [GO:0007186]; gastric acid secretion [GO:0001696]; negative regulation of apoptotic process [GO:0043066]; negative regulation of circadian sleep/wake…	axon [GO:0030424]; cytoplasm [GO:0005737]; extracellular region [GO:0005576]; extracellular space [GO:0005615]; glutamatergic synapse [GO:0098978]; postsynapse [GO:0098794]; Schaffer collateral - CA1 synapse [GO:0098685]	axon [GO:0030424]; cytoplasm [GO:0005737]; extracellular region [GO:0005576]; extracellular space [GO:0005615]; glutamatergic synapse [GO:0098978]; postsynapse [GO:0098794]; Schaffer collateral - CA1 synapse [GO:0098685]; G protein-coupled receptor binding [GO:0001664]; ghrelin receptor binding [GO:0031768]; growth hormone-releasing hormone activity [GO:0016608]; hormone activity [GO:0005179]; pr…	G protein-coupled receptor binding [GO:0001664]; ghrelin receptor binding [GO:0031768]; growth hormone-releasing hormone activity [GO:0016608]; hormone activity [GO:0005179]; protein tyrosine kinase activator activity [GO:0030296]	SUBCELLULAR LOCATION: Secreted {ECO:0000269|PubMed:10930375}.	3	3	3	3	1	2
Q7TQP3	GP119_MOUSE	Glucose-dependent insulinotropic receptor (G-protein coupled receptor 119)	Gpr119	7	1.55175	1.12375	0	adenylate cyclase-activating G protein-coupled receptor signaling pathway [GO:0007189]; insulin secretion [GO:0030073]; regulation of metabolic process [GO:0019222]	cytoplasm [GO:0005737]; plasma membrane [GO:0005886]; receptor complex [GO:0043235]	cytoplasm [GO:0005737]; plasma membrane [GO:0005886]; receptor complex [GO:0043235]; G protein-coupled receptor activity [GO:0004930]; phosphatidylcholine binding [GO:0031210]; adenylate cyclase-activating G protein-coupled receptor signaling pathway [GO:0007189]; insulin secretion [GO:0030073]; regulation of metabolic process [GO:0019222]	G protein-coupled receptor activity [GO:0004930]; phosphatidylcholine binding [GO:0031210]	SUBCELLULAR LOCATION: Cell membrane; Multi-pass membrane protein.	0	1	1	2	2	1
Q8BZA7	GPR26_MOUSE	G-protein coupled receptor 26	Gpr26	6	1.72289	0.565964	0	adenylate cyclase-activating G protein-coupled receptor signaling pathway [GO:0007189]	plasma membrane [GO:0005886]	plasma membrane [GO:0005886]; G protein-coupled receptor activity [GO:0004930]; adenylate cyclase-activating G protein-coupled receptor signaling pathway [GO:0007189]	G protein-coupled receptor activity [GO:0004930]	SUBCELLULAR LOCATION: Cell membrane; Multi-pass membrane protein.	13	12	14	13	14	11
Q8K4Z6	GPC6A_MOUSE	G-protein coupled receptor family C group 6 member A	Gprc6a	7	1.40346	0.521081	0	regulation of testosterone biosynthetic process [GO:2000224]; response to amino acid [GO:0043200]	plasma membrane [GO:0005886]	plasma membrane [GO:0005886]; G protein-coupled receptor activity [GO:0004930]; regulation of testosterone biosynthetic process [GO:2000224]; response to amino acid [GO:0043200]	G protein-coupled receptor activity [GO:0004930]	SUBCELLULAR LOCATION: Cell membrane {ECO:0000269|PubMed:15816861}; Multi-pass membrane protein {ECO:0000269|PubMed:15816861}.	21	22	22	20	19	21
Q5NCH9	GRM6_MOUSE	Metabotropic glutamate receptor 6 (mGluR6)	Grm6	7	2.03491	0.387589	0	adenylate cyclase-inhibiting G protein-coupled glutamate receptor signaling pathway [GO:0007196]; chemical synaptic transmission [GO:0007268]; detection of light stimulus involved in visual perception [GO:0050908]; G protein-coupled glutamate receptor signaling pathway [GO:0007216]; G protein-coupled receptor signaling pathway [GO:0007186]; locomotory behavior [GO:0007626]; positive regulation of…	dendrite [GO:0030425]; endoplasmic reticulum membrane [GO:0005789]; Golgi membrane [GO:0000139]; new growing cell tip [GO:0035841]; plasma membrane [GO:0005886]; postsynaptic membrane [GO:0045211]	dendrite [GO:0030425]; endoplasmic reticulum membrane [GO:0005789]; Golgi membrane [GO:0000139]; new growing cell tip [GO:0035841]; plasma membrane [GO:0005886]; postsynaptic membrane [GO:0045211]; adenylate cyclase inhibiting G protein-coupled glutamate receptor activity [GO:0001640]; glutamate receptor activity [GO:0008066]; group III metabotropic glutamate receptor activity [GO:0001642]; prote…	adenylate cyclase inhibiting G protein-coupled glutamate receptor activity [GO:0001640]; glutamate receptor activity [GO:0008066]; group III metabotropic glutamate receptor activity [GO:0001642]; protein homodimerization activity [GO:0042803]	SUBCELLULAR LOCATION: Cell membrane; Multi-pass membrane protein. Endoplasmic reticulum membrane {ECO:0000250}; Multi-pass membrane protein {ECO:0000250}. Golgi apparatus membrane {ECO:0000250}; Multi-pass membrane protein {ECO:0000250}. Cell projection, dendrite. Note=Subject to trafficking from the endoplasmic reticulum to the Golgi apparatus and then to the cell membrane (By similarity). Detec…	7	7	6	9	8	7
Q91VB8	Q91VB8_MOUSE	Alpha globin 1 (Alpha globin 2) (Alpha-globin) (Globin c1) (Hemoglobin alpha, adult chain 1) (Hemoglobin alpha, adult chain 2)	Hba-a1	0	0.917647	0.468801	0	cellular oxidant detoxification [GO:0098869]; erythrocyte development [GO:0048821]; in utero embryonic development [GO:0001701]; response to bacterium [GO:0009617]	extracellular space [GO:0005615]; haptoglobin-hemoglobin complex [GO:0031838]; hemoglobin complex [GO:0005833]	extracellular space [GO:0005615]; haptoglobin-hemoglobin complex [GO:0031838]; hemoglobin complex [GO:0005833]; G protein-coupled receptor binding [GO:0001664]; heme binding [GO:0020037]; iron ion binding [GO:0005506]; oxygen binding [GO:0019825]; oxygen carrier activity [GO:0005344]; cellular oxidant detoxification [GO:0098869]; erythrocyte development [GO:0048821]; in utero embryonic developmen…	G protein-coupled receptor binding [GO:0001664]; heme binding [GO:0020037]; iron ion binding [GO:0005506]; oxygen binding [GO:0019825]; oxygen carrier activity [GO:0005344]		8	7	7	7	7	8
O35632	HYAL2_MOUSE	Hyaluronidase-2 (Hyal-2) (EC 3.2.1.35) (Hyaluronoglucosaminidase-2)	Hyal2	0	1.30587	0.720713	0	carbohydrate metabolic process [GO:0005975]; cartilage development [GO:0051216]; cellular response to fibroblast growth factor stimulus [GO:0044344]; cellular response to interleukin-1 [GO:0071347]; cellular response to transforming growth factor beta stimulus [GO:0071560]; cellular response to tumor necrosis factor [GO:0071356]; cellular response to UV-B [GO:0071493]; defense response to virus […	apical plasma membrane [GO:0016324]; cell surface [GO:0009986]; cytoplasm [GO:0005737]; cytoplasmic vesicle [GO:0031410]; cytosol [GO:0005829]; endocytic vesicle [GO:0030139]; Golgi membrane [GO:0000139]; lysosome [GO:0005764]; membrane raft [GO:0045121]; microvillus [GO:0005902]; perinuclear region of cytoplasm [GO:0048471]; plasma membrane [GO:0005886]; RNA polymerase II transcription regulator…	apical plasma membrane [GO:0016324]; cell surface [GO:0009986]; cytoplasm [GO:0005737]; cytoplasmic vesicle [GO:0031410]; cytosol [GO:0005829]; endocytic vesicle [GO:0030139]; Golgi membrane [GO:0000139]; lysosome [GO:0005764]; membrane raft [GO:0045121]; microvillus [GO:0005902]; perinuclear region of cytoplasm [GO:0048471]; plasma membrane [GO:0005886]; RNA polymerase II transcription regulator…	enzyme binding [GO:0019899]; hyaluronic acid binding [GO:0005540]; hyaluronoglucuronidase activity [GO:0033906]; hyalurononglucosaminidase activity [GO:0004415]; receptor signaling protein tyrosine kinase inhibitor activity [GO:0030294]; receptor tyrosine kinase binding [GO:0030971]; transforming growth factor beta binding [GO:0050431]; virus receptor activity [GO:0001618]	SUBCELLULAR LOCATION: Cell membrane {ECO:0000250}; Lipid-anchor, GPI-anchor {ECO:0000250}.	2	2	1	1	1	2
Q60766	IRGM1_MOUSE	Immunity-related GTPase family M protein 1 (EC 3.6.5.-) (Interferon-inducible GTPase 3) (Interferon-inducible protein 1) (LPS-stimulated RAW 264.7 macrophage protein 47) (LRG-47)	Irgm1	1	1.69131	1.80349	0	autophagosome assembly [GO:0000045]; autophagosome maturation [GO:0097352]; CAMKK-AMPK signaling cascade [GO:0061762]; cellular response to interferon-beta [GO:0035458]; cellular response to lipopolysaccharide [GO:0071222]; cellular response to type II interferon [GO:0071346]; cellular response to virus [GO:0098586]; defense response [GO:0006952]; defense response to bacterium [GO:0042742]; defen…	autolysosome [GO:0044754]; autophagosome [GO:0005776]; autophagosome membrane [GO:0000421]; cell projection [GO:0042995]; cytosol [GO:0005829]; endoplasmic reticulum [GO:0005783]; endoplasmic reticulum membrane [GO:0005789]; Golgi apparatus [GO:0005794]; Golgi membrane [GO:0000139]; late endosome [GO:0005770]; late endosome membrane [GO:0031902]; lipid droplet [GO:0005811]; lysosomal membrane [GO…	autolysosome [GO:0044754]; autophagosome [GO:0005776]; autophagosome membrane [GO:0000421]; cell projection [GO:0042995]; cytosol [GO:0005829]; endoplasmic reticulum [GO:0005783]; endoplasmic reticulum membrane [GO:0005789]; Golgi apparatus [GO:0005794]; Golgi membrane [GO:0000139]; late endosome [GO:0005770]; late endosome membrane [GO:0031902]; lipid droplet [GO:0005811]; lysosomal membrane [GO…	BH3 domain binding [GO:0051434]; CARD domain binding [GO:0050700]; cardiolipin binding [GO:1901612]; G protein activity [GO:0003925]; GTP binding [GO:0005525]; GTPase activity [GO:0003924]; phosphatidylinositol-3,4,5-trisphosphate binding [GO:0005547]; phosphatidylinositol-3,4-bisphosphate binding [GO:0043325]; protein kinase binding [GO:0019901]; protein serine/threonine kinase activator activit…	SUBCELLULAR LOCATION: Golgi apparatus membrane {ECO:0000269|PubMed:15294976, ECO:0000269|PubMed:15908352, ECO:0000269|PubMed:20072621, ECO:0000269|PubMed:24751652}. Cell membrane {ECO:0000269|PubMed:15294976}. Cytoplasmic vesicle, phagosome membrane {ECO:0000269|PubMed:15294976, ECO:0000269|PubMed:19620982}. Cytoplasmic vesicle, autophagosome membrane {ECO:0000269|PubMed:15294976}. Lysosome membr…	1	0	1	3	4	2
Q91WW3	MRGA3_MOUSE	Mas-related G-protein coupled receptor member A3	Mrgpra3	7	1.85036	1.59995	0	acute-phase response [GO:0006953]; cell surface receptor signaling pathway [GO:0007166]; chemosensory behavior [GO:0007635]; G protein-coupled receptor signaling pathway [GO:0007186]; mast cell activation [GO:0045576]; mast cell degranulation [GO:0043303]; positive regulation of cytokinesis [GO:0032467]; response to chloroquine [GO:1902349]	axon [GO:0030424]; neuronal cell body membrane [GO:0032809]	axon [GO:0030424]; neuronal cell body membrane [GO:0032809]; G protein-coupled receptor activity [GO:0004930]; neuropeptide binding [GO:0042923]; transmembrane signaling receptor activity [GO:0004888]; acute-phase response [GO:0006953]; cell surface receptor signaling pathway [GO:0007166]; chemosensory behavior [GO:0007635]; G protein-coupled receptor signaling pathway [GO:0007186]; mast cell act…	G protein-coupled receptor activity [GO:0004930]; neuropeptide binding [GO:0042923]; transmembrane signaling receptor activity [GO:0004888]	SUBCELLULAR LOCATION: Cell membrane; Multi-pass membrane protein.	7	5	5	5	7	5
Q60887	O10N1_MOUSE	Olfactory receptor 10N1 (Odorant receptor M30) (Olfactory receptor 148) (Olfactory receptor 224-4) (Olfactory receptor 7F)	Or10n1	7	2.04704	0.921619	0	detection of chemical stimulus involved in sensory perception of smell [GO:0050911]; G protein-coupled receptor signaling pathway [GO:0007186]; sensory perception of smell [GO:0007608]	membrane [GO:0016020]; plasma membrane [GO:0005886]	membrane [GO:0016020]; plasma membrane [GO:0005886]; G protein-coupled receptor activity [GO:0004930]; olfactory receptor activity [GO:0004984]; detection of chemical stimulus involved in sensory perception of smell [GO:0050911]; G protein-coupled receptor signaling pathway [GO:0007186]; sensory perception of smell [GO:0007608]	G protein-coupled receptor activity [GO:0004930]; olfactory receptor activity [GO:0004984]	SUBCELLULAR LOCATION: Cell membrane {ECO:0000305}; Multi-pass membrane protein {ECO:0000255}.	10	9	10	11	11	9
Q7TR08	Q7TR08_MOUSE	Olfactory receptor	Or4c107	7	1.2431	0.385094	0	G protein-coupled receptor signaling pathway [GO:0007186]; sensory perception of smell [GO:0007608]	membrane [GO:0016020]; plasma membrane [GO:0005886]	membrane [GO:0016020]; plasma membrane [GO:0005886]; G protein-coupled receptor activity [GO:0004930]; olfactory receptor activity [GO:0004984]; G protein-coupled receptor signaling pathway [GO:0007186]; sensory perception of smell [GO:0007608]	G protein-coupled receptor activity [GO:0004930]; olfactory receptor activity [GO:0004984]	SUBCELLULAR LOCATION: Cell membrane {ECO:0000256|RuleBase:RU363047}; Multi-pass membrane protein {ECO:0000256|RuleBase:RU363047}. Membrane {ECO:0000256|ARBA:ARBA00004141}; Multi-pass membrane protein {ECO:0000256|ARBA:ARBA00004141}.	9	9	9	9	9	9
Q7TQX1	Q7TQX1_MOUSE	Olfactory receptor	Or4f14b	7	1.41624	0.687625	0	G protein-coupled receptor signaling pathway [GO:0007186]; sensory perception of smell [GO:0007608]	membrane [GO:0016020]; plasma membrane [GO:0005886]	membrane [GO:0016020]; plasma membrane [GO:0005886]; G protein-coupled receptor activity [GO:0004930]; olfactory receptor activity [GO:0004984]; G protein-coupled receptor signaling pathway [GO:0007186]; sensory perception of smell [GO:0007608]	G protein-coupled receptor activity [GO:0004930]; olfactory receptor activity [GO:0004984]	SUBCELLULAR LOCATION: Cell membrane {ECO:0000256|RuleBase:RU363047}; Multi-pass membrane protein {ECO:0000256|RuleBase:RU363047}. Membrane {ECO:0000256|ARBA:ARBA00004141}; Multi-pass membrane protein {ECO:0000256|ARBA:ARBA00004141}.	2	2	3	3	4	3
Q8VF65	O5P51_MOUSE	Olfactory receptor 5P51 (Olfactory receptor 204-22) (Olfactory receptor 470)	Or5p51	7	2.77095	3.11786	0	G protein-coupled receptor signaling pathway [GO:0007186]; sensory perception of smell [GO:0007608]	membrane [GO:0016020]; plasma membrane [GO:0005886]	membrane [GO:0016020]; plasma membrane [GO:0005886]; G protein-coupled receptor activity [GO:0004930]; odorant binding [GO:0005549]; olfactory receptor activity [GO:0004984]; G protein-coupled receptor signaling pathway [GO:0007186]; sensory perception of smell [GO:0007608]	G protein-coupled receptor activity [GO:0004930]; odorant binding [GO:0005549]; olfactory receptor activity [GO:0004984]	SUBCELLULAR LOCATION: Cell membrane {ECO:0000305}; Multi-pass membrane protein {ECO:0000255}.	5	5	5	11	12	9
Q8VFC9	O5P54_MOUSE	Olfactory receptor 5P54 (Olfactory receptor 204-20) (Olfactory receptor 474)	Or5p54	7	0.275436	0.242066	0	G protein-coupled receptor signaling pathway [GO:0007186]; sensory perception of smell [GO:0007608]	membrane [GO:0016020]; plasma membrane [GO:0005886]	membrane [GO:0016020]; plasma membrane [GO:0005886]; G protein-coupled receptor activity [GO:0004930]; odorant binding [GO:0005549]; olfactory receptor activity [GO:0004984]; G protein-coupled receptor signaling pathway [GO:0007186]; sensory perception of smell [GO:0007608]	G protein-coupled receptor activity [GO:0004930]; odorant binding [GO:0005549]; olfactory receptor activity [GO:0004984]	SUBCELLULAR LOCATION: Cell membrane {ECO:0000305}; Multi-pass membrane protein {ECO:0000255}.	7	8	6	5	9	6
A0A0N4SVH6	A0A0N4SVH6_MOUSE	Olfactory receptor family 6 subfamily C member 219	Or6c219	2	0.509071	3.42333	0	G protein-coupled receptor signaling pathway [GO:0007186]; sensory perception of smell [GO:0007608]	membrane [GO:0016020]; plasma membrane [GO:0005886]	membrane [GO:0016020]; plasma membrane [GO:0005886]; G protein-coupled receptor activity [GO:0004930]; olfactory receptor activity [GO:0004984]; G protein-coupled receptor signaling pathway [GO:0007186]; sensory perception of smell [GO:0007608]	G protein-coupled receptor activity [GO:0004930]; olfactory receptor activity [GO:0004984]	SUBCELLULAR LOCATION: Cell membrane {ECO:0000256|ARBA:ARBA00004651}; Multi-pass membrane protein {ECO:0000256|ARBA:ARBA00004651}. Membrane {ECO:0000256|ARBA:ARBA00004141}; Multi-pass membrane protein {ECO:0000256|ARBA:ARBA00004141}.	1	0	2	1	3	1
Q9CPV9	P2Y12_MOUSE	P2Y purinoceptor 12 (P2Y12)	P2ry12	7	1.95548	0.872133	0	adenylate cyclase-inhibiting G protein-coupled receptor signaling pathway [GO:0007193]; adenylate cyclase-modulating G protein-coupled receptor signaling pathway [GO:0007188]; calcium ion transmembrane transport [GO:0070588]; calcium-mediated signaling [GO:0019722]; calcium-mediated signaling using extracellular calcium source [GO:0035585]; cell projection organization [GO:0030030]; cellular resp…	basal plasma membrane [GO:0009925]; caveola [GO:0005901]; cell body membrane [GO:0044298]; cell projection membrane [GO:0031253]; external side of plasma membrane [GO:0009897]; membrane [GO:0016020]; plasma membrane [GO:0005886]	basal plasma membrane [GO:0009925]; caveola [GO:0005901]; cell body membrane [GO:0044298]; cell projection membrane [GO:0031253]; external side of plasma membrane [GO:0009897]; membrane [GO:0016020]; plasma membrane [GO:0005886]; G protein-coupled adenosine receptor activity [GO:0001609]; G protein-coupled ADP receptor activity [GO:0001621]; G protein-coupled purinergic nucleotide receptor activi…	G protein-coupled adenosine receptor activity [GO:0001609]; G protein-coupled ADP receptor activity [GO:0001621]; G protein-coupled purinergic nucleotide receptor activity [GO:0045028]	SUBCELLULAR LOCATION: Cell membrane; Multi-pass membrane protein.	19	15	15	14	14	13
Q9ERK9	P2RY6_MOUSE	P2Y purinoceptor 6 (P2Y6)	P2ry6	6	2.68945	1.25961	0	cellular response to organic cyclic compound [GO:0071407]; cellular response to prostaglandin E stimulus [GO:0071380]; cellular response to purine-containing compound [GO:0071415]; cellular response to pyrimidine ribonucleotide [GO:1905835]; G protein-coupled receptor signaling pathway [GO:0007186]; phagocytosis [GO:0006909]; positive regulation of ERK1 and ERK2 cascade [GO:0070374]; positive reg…	apical plasma membrane [GO:0016324]; basolateral plasma membrane [GO:0016323]; plasma membrane [GO:0005886]	apical plasma membrane [GO:0016324]; basolateral plasma membrane [GO:0016323]; plasma membrane [GO:0005886]; G protein-coupled ADP receptor activity [GO:0001621]; G protein-coupled UDP receptor activity [GO:0045029]; G protein-coupled UTP receptor activity [GO:0045030]; pyrimidine nucleotide binding [GO:0019103]; cellular response to organic cyclic compound [GO:0071407]; cellular response to pros…	G protein-coupled ADP receptor activity [GO:0001621]; G protein-coupled UDP receptor activity [GO:0045029]; G protein-coupled UTP receptor activity [GO:0045030]; pyrimidine nucleotide binding [GO:0019103]	SUBCELLULAR LOCATION: Cell membrane; Multi-pass membrane protein.	12	13	13	12	10	13
P41593	PTH1R_MOUSE	Parathyroid hormone/parathyroid hormone-related peptide receptor (PTH/PTHrP type I receptor) (PTH/PTHr receptor) (Parathyroid hormone 1 receptor) (PTH1 receptor)	Pth1r	7	0.373625	0.181285	0	adenylate cyclase-activating G protein-coupled receptor signaling pathway [GO:0007189]; adenylate cyclase-modulating G protein-coupled receptor signaling pathway [GO:0007188]; bone mineralization [GO:0030282]; bone resorption [GO:0045453]; cell maturation [GO:0048469]; cell population proliferation [GO:0008283]; cell surface receptor signaling pathway [GO:0007166]; chondrocyte differentiation [GO…	apical plasma membrane [GO:0016324]; basolateral plasma membrane [GO:0016323]; brush border membrane [GO:0031526]; plasma membrane [GO:0005886]; receptor complex [GO:0043235]	apical plasma membrane [GO:0016324]; basolateral plasma membrane [GO:0016323]; brush border membrane [GO:0031526]; plasma membrane [GO:0005886]; receptor complex [GO:0043235]; G protein-coupled peptide receptor activity [GO:0008528]; parathyroid hormone receptor activity [GO:0004991]; peptide hormone binding [GO:0017046]; protein homodimerization activity [GO:0042803]; protein self-association [G…	G protein-coupled peptide receptor activity [GO:0008528]; parathyroid hormone receptor activity [GO:0004991]; peptide hormone binding [GO:0017046]; protein homodimerization activity [GO:0042803]; protein self-association [GO:0043621]	SUBCELLULAR LOCATION: Cell membrane {ECO:0000269|PubMed:8197183}; Multi-pass membrane protein {ECO:0000305}.	25	25	25	26	28	27
P46638	RB11B_MOUSE	Ras-related protein Rab-11B (EC 3.6.5.2)	Rab11b	0	0.764869	0.336352	0	amyloid-beta clearance by transcytosis [GO:0150093]; cellular response to acidic pH [GO:0071468]; constitutive secretory pathway [GO:0045054]; endocytic recycling [GO:0032456]; establishment of protein localization to membrane [GO:0090150]; insulin secretion involved in cellular response to glucose stimulus [GO:0035773]; melanosome transport [GO:0032402]; receptor recycling [GO:0001881]; regulate…	cytoplasm [GO:0005737]; cytoplasmic vesicle [GO:0031410]; Golgi apparatus [GO:0005794]; mitochondrion [GO:0005739]; phagocytic vesicle [GO:0045335]; phagocytic vesicle membrane [GO:0030670]; recycling endosome [GO:0055037]; recycling endosome membrane [GO:0055038]; synaptic vesicle [GO:0008021]; synaptic vesicle membrane [GO:0030672]	cytoplasm [GO:0005737]; cytoplasmic vesicle [GO:0031410]; Golgi apparatus [GO:0005794]; mitochondrion [GO:0005739]; phagocytic vesicle [GO:0045335]; phagocytic vesicle membrane [GO:0030670]; recycling endosome [GO:0055037]; recycling endosome membrane [GO:0055038]; synaptic vesicle [GO:0008021]; synaptic vesicle membrane [GO:0030672]; G protein activity [GO:0003925]; GDP binding [GO:0019003]; GTP…	G protein activity [GO:0003925]; GDP binding [GO:0019003]; GTP binding [GO:0005525]; GTPase activity [GO:0003924]; myosin V binding [GO:0031489]	SUBCELLULAR LOCATION: Recycling endosome membrane {ECO:0000305|PubMed:10942597}; Lipid-anchor {ECO:0000305|PubMed:10942597}; Cytoplasmic side {ECO:0000305|PubMed:10942597}. Cytoplasmic vesicle, secretory vesicle, synaptic vesicle membrane {ECO:0000250|UniProtKB:O35509}; Lipid-anchor {ECO:0000250|UniProtKB:O35509}; Cytoplasmic side {ECO:0000250|UniProtKB:O35509}. Cytoplasmic vesicle, phagosome mem…	5	6	6	7	5	4
P35278	RAB5C_MOUSE	Ras-related protein Rab-5C (EC 3.6.5.2)	Rab5c	0	0.612255	0.345955	0	endocytosis [GO:0006897]; endosome organization [GO:0007032]; intracellular protein transport [GO:0006886]; plasma membrane to endosome transport [GO:0048227]; regulation of endocytosis [GO:0030100]	early endosome membrane [GO:0031901]; endocytic vesicle [GO:0030139]; endomembrane system [GO:0012505]; endosome [GO:0005768]; lipid droplet [GO:0005811]; melanosome [GO:0042470]; plasma membrane [GO:0005886]; synaptic vesicle membrane [GO:0030672]	early endosome membrane [GO:0031901]; endocytic vesicle [GO:0030139]; endomembrane system [GO:0012505]; endosome [GO:0005768]; lipid droplet [GO:0005811]; melanosome [GO:0042470]; plasma membrane [GO:0005886]; synaptic vesicle membrane [GO:0030672]; G protein activity [GO:0003925]; GDP binding [GO:0019003]; GTP binding [GO:0005525]; GTPase activity [GO:0003924]; endocytosis [GO:0006897]; endosome…	G protein activity [GO:0003925]; GDP binding [GO:0019003]; GTP binding [GO:0005525]; GTPase activity [GO:0003924]	SUBCELLULAR LOCATION: Cell membrane {ECO:0000250|UniProtKB:P20339}; Lipid-anchor {ECO:0000250|UniProtKB:P20339}; Cytoplasmic side {ECO:0000250|UniProtKB:P20339}. Early endosome membrane {ECO:0000250|UniProtKB:P20339}; Lipid-anchor {ECO:0000250|UniProtKB:P20339}. Melanosome {ECO:0000250|UniProtKB:P51148}.	1	1	1	2	2	2
A0A1Y7VL93	A0A1Y7VL93_MOUSE	V-ral simian leukemia viral oncogene A (ras related)	Rala	0	1.0931	0.331706	0	signal transduction [GO:0007165]	membrane [GO:0016020]	membrane [GO:0016020]; G protein activity [GO:0003925]; GTP binding [GO:0005525]; signal transduction [GO:0007165]	G protein activity [GO:0003925]; GTP binding [GO:0005525]		2	1	1	1	2	1
Q80ZS9	Q80ZS9_MOUSE	Secretin	Sct	0	0.487083	0.337975	0	embryonic digestive tract development [GO:0048566]; intracellular water homeostasis [GO:0009992]; negative regulation of gastrin-induced gastric acid secretion [GO:1903640]; positive regulation of cAMP-mediated signaling [GO:0043950]; positive regulation of pancreatic juice secretion [GO:0090187]; positive regulation of somatostatin secretion [GO:0090274]	extracellular space [GO:0005615]	extracellular space [GO:0005615]; digestive hormone activity [GO:0046659]; G protein-coupled receptor binding [GO:0001664]; embryonic digestive tract development [GO:0048566]; intracellular water homeostasis [GO:0009992]; negative regulation of gastrin-induced gastric acid secretion [GO:1903640]; positive regulation of cAMP-mediated signaling [GO:0043950]; positive regulation of pancreatic juice …	digestive hormone activity [GO:0046659]; G protein-coupled receptor binding [GO:0001664]	SUBCELLULAR LOCATION: Secreted {ECO:0000256|ARBA:ARBA00004613}.	1	1	2	2	2	2
P70302	STIM1_MOUSE	Stromal interaction molecule 1	Stim1	1	0.0149044	0.0453841	0	activation of store-operated calcium channel activity [GO:0032237]; detection of calcium ion [GO:0005513]; enamel mineralization [GO:0070166]; establishment of localization in cell [GO:0051649]; intracellular calcium ion homeostasis [GO:0006874]; ion channel modulating, G protein-coupled receptor signaling pathway [GO:0099105]; ligand-gated ion channel signaling pathway [GO:1990806]; monoatomic c…	cortical endoplasmic reticulum [GO:0032541]; endoplasmic reticulum [GO:0005783]; endoplasmic reticulum membrane [GO:0005789]; growth cone [GO:0030426]; microtubule [GO:0005874]; plasma membrane [GO:0005886]; plasma membrane raft [GO:0044853]; protein-containing complex [GO:0032991]; sarcoplasmic reticulum membrane [GO:0033017]; synapse [GO:0045202]	cortical endoplasmic reticulum [GO:0032541]; endoplasmic reticulum [GO:0005783]; endoplasmic reticulum membrane [GO:0005789]; growth cone [GO:0030426]; microtubule [GO:0005874]; plasma membrane [GO:0005886]; plasma membrane raft [GO:0044853]; protein-containing complex [GO:0032991]; sarcoplasmic reticulum membrane [GO:0033017]; synapse [GO:0045202]; calcium channel regulator activity [GO:0005246]…	calcium channel regulator activity [GO:0005246]; calcium ion binding [GO:0005509]; channel activator activity [GO:0099103]; identical protein binding [GO:0042802]; ion channel regulator activity involved in G protein-coupled receptor signaling pathway [GO:0099107]; microtubule plus-end binding [GO:0051010]; protease binding [GO:0002020]; store-operated calcium channel activity [GO:0015279]	SUBCELLULAR LOCATION: Cell membrane {ECO:0000250|UniProtKB:Q13586}; Single-pass type I membrane protein {ECO:0000250|UniProtKB:Q13586}. Endoplasmic reticulum membrane {ECO:0000250|UniProtKB:Q13586}; Single-pass type I membrane protein {ECO:0000250|UniProtKB:Q13586}. Sarcoplasmic reticulum {ECO:0000250|UniProtKB:Q13586}. Cytoplasm, cytoskeleton {ECO:0000250|UniProtKB:Q13586}. Note=Translocates fro…	1	3	3	4	4	2
Q7TQA7	TA2R3_MOUSE	Taste receptor type 2 member 3 (T2R3) (T2R137) (T2R37) (mT2r41)	Tas2r3	7	2.2347	1.44858	0	detection of chemical stimulus involved in sensory perception of bitter taste [GO:0001580]	membrane [GO:0016020]	membrane [GO:0016020]; bitter taste receptor activity [GO:0033038]; G protein-coupled receptor activity [GO:0004930]; taste receptor activity [GO:0008527]; detection of chemical stimulus involved in sensory perception of bitter taste [GO:0001580]	bitter taste receptor activity [GO:0033038]; G protein-coupled receptor activity [GO:0004930]; taste receptor activity [GO:0008527]	SUBCELLULAR LOCATION: Membrane; Multi-pass membrane protein.	5	8	6	10	11	8
Q9QXX8	NUFP1_MOUSE	FMR1-interacting protein NUFIP1 (Nuclear FMRP-interacting protein 1)	Nufip1	0	2.42063	1.34587	1	box C/D snoRNP assembly [GO:0000492]; positive regulation of transcription by RNA polymerase II [GO:0045944]	fibrillar center [GO:0001650]; nuclear matrix [GO:0016363]; nucleolus [GO:0005730]; nucleoplasm [GO:0005654]; nucleus [GO:0005634]; perichromatin fibrils [GO:0005726]; pre-snoRNP complex [GO:0070761]; presynaptic active zone [GO:0048786]; protein-containing complex [GO:0032991]; synapse [GO:0045202]; transcription elongation factor complex [GO:0008023]	fibrillar center [GO:0001650]; nuclear matrix [GO:0016363]; nucleolus [GO:0005730]; nucleoplasm [GO:0005654]; nucleus [GO:0005634]; perichromatin fibrils [GO:0005726]; pre-snoRNP complex [GO:0070761]; presynaptic active zone [GO:0048786]; protein-containing complex [GO:0032991]; synapse [GO:0045202]; transcription elongation factor complex [GO:0008023]; ATPase binding [GO:0051117]; identical prot…	ATPase binding [GO:0051117]; identical protein binding [GO:0042802]; metal ion binding [GO:0046872]; protein-macromolecule adaptor activity [GO:0030674]; RNA binding [GO:0003723]; snoRNA binding [GO:0030515]	SUBCELLULAR LOCATION: Nucleus {ECO:0000269|PubMed:10556305}. Note=Distributed in the nucleus in a dot-like pattern.	2	3	2	1	4	3
P28271	ACOHC_MOUSE	Cytoplasmic aconitate hydratase (Aconitase) (EC 4.2.1.3) (Citrate hydro-lyase) (Iron regulatory protein 1) (IRP1) (Iron-responsive element-binding protein 1) (IRE-BP 1)	Aco1	0	2.00047	0.63649	0	citrate metabolic process [GO:0006101]; intestinal absorption [GO:0050892]; intracellular iron ion homeostasis [GO:0006879]; post-embryonic development [GO:0009791]; regulation of gene expression [GO:0010468]; regulation of translation [GO:0006417]; response to iron(II) ion [GO:0010040]; tricarboxylic acid cycle [GO:0006099]	cytoplasm [GO:0005737]; cytosol [GO:0005829]; endoplasmic reticulum [GO:0005783]; Golgi apparatus [GO:0005794]; mitochondrion [GO:0005739]	cytoplasm [GO:0005737]; cytosol [GO:0005829]; endoplasmic reticulum [GO:0005783]; Golgi apparatus [GO:0005794]; mitochondrion [GO:0005739]; 3 iron, 4 sulfur cluster binding [GO:0051538]; 4 iron, 4 sulfur cluster binding [GO:0051539]; aconitate hydratase activity [GO:0003994]; iron-responsive element binding [GO:0030350]; iron-sulfur cluster binding [GO:0051536]; metal ion binding [GO:0046872]; mR…	3 iron, 4 sulfur cluster binding [GO:0051538]; 4 iron, 4 sulfur cluster binding [GO:0051539]; aconitate hydratase activity [GO:0003994]; iron-responsive element binding [GO:0030350]; iron-sulfur cluster binding [GO:0051536]; metal ion binding [GO:0046872]; mRNA 5'-UTR binding [GO:0048027]; RNA binding [GO:0003723]	SUBCELLULAR LOCATION: Cytoplasm, cytosol {ECO:0000250|UniProtKB:P21399}.	25	26	22	23	24	22
Q91XE4	ACY3_MOUSE	N-acyl-aromatic-L-amino acid amidohydrolase (carboxylate-forming) (EC 3.5.1.114) (Acylase III) (Aminoacylase III) (AAIII) (Aminoacylase-3) (ACY-3) (Aspartoacylase-2) (Hepatitis C virus core-binding protein 1) (HCBP1)	Acy3	0	3.38277	0.718032	0		apical plasma membrane [GO:0016324]; cytoplasm [GO:0005737]; cytosol [GO:0005829]; membrane [GO:0016020]	apical plasma membrane [GO:0016324]; cytoplasm [GO:0005737]; cytosol [GO:0005829]; membrane [GO:0016020]; aminoacylase activity [GO:0004046]; hydrolase activity, acting on ester bonds [GO:0016788]; identical protein binding [GO:0042802]; metal ion binding [GO:0046872]	aminoacylase activity [GO:0004046]; hydrolase activity, acting on ester bonds [GO:0016788]; identical protein binding [GO:0042802]; metal ion binding [GO:0046872]	SUBCELLULAR LOCATION: Apical cell membrane {ECO:0000269|PubMed:14656720}; Peripheral membrane protein {ECO:0000269|PubMed:14656720}. Cytoplasm {ECO:0000269|PubMed:14656720}. Note=Predominantly localized in the apical membrane of cells in the S1 segment. In the proximal straight tubules (S2 and S3 segments) is expressed diffusely throughout the cytoplasm.	9	7	9	10	10	11
O35598	ADA10_MOUSE	Disintegrin and metalloproteinase domain-containing protein 10 (ADAM 10) (EC 3.4.24.81) (Kuzbanian protein homolog) (Mammalian disintegrin-metalloprotease) (CD antigen CD156c)	Adam10	1	0.0105116	-0.0216859	0	adherens junction organization [GO:0034332]; amyloid precursor protein catabolic process [GO:0042987]; amyloid-beta formation [GO:0034205]; cochlea development [GO:0090102]; constitutive protein ectodomain proteolysis [GO:0051089]; epidermal growth factor receptor ligand maturation [GO:0038004]; in utero embryonic development [GO:0001701]; membrane protein ectodomain proteolysis [GO:0006509]; mon…	adherens junction [GO:0005912]; axon [GO:0030424]; cell surface [GO:0009986]; clathrin-coated vesicle [GO:0030136]; collagen-containing extracellular matrix [GO:0062023]; cytoplasm [GO:0005737]; dendrite [GO:0030425]; dendritic spine [GO:0043197]; glutamatergic synapse [GO:0098978]; Golgi apparatus [GO:0005794]; Golgi membrane [GO:0000139]; Golgi-associated vesicle [GO:0005798]; intracellular mem…	adherens junction [GO:0005912]; axon [GO:0030424]; cell surface [GO:0009986]; clathrin-coated vesicle [GO:0030136]; collagen-containing extracellular matrix [GO:0062023]; cytoplasm [GO:0005737]; dendrite [GO:0030425]; dendritic spine [GO:0043197]; glutamatergic synapse [GO:0098978]; Golgi apparatus [GO:0005794]; Golgi membrane [GO:0000139]; Golgi-associated vesicle [GO:0005798]; intracellular mem…	endopeptidase activity [GO:0004175]; metal ion binding [GO:0046872]; metallodipeptidase activity [GO:0070573]; metalloendopeptidase activity [GO:0004222]; metalloendopeptidase activity involved in amyloid precursor protein catabolic process [GO:1902945]; metallopeptidase activity [GO:0008237]; molecular adaptor activity [GO:0060090]; protein homodimerization activity [GO:0042803]; protein kinase …	SUBCELLULAR LOCATION: Cell membrane {ECO:0000269|PubMed:23676497, ECO:0000269|PubMed:26668317, ECO:0000269|PubMed:30463011}; Single-pass type I membrane protein {ECO:0000305}. Golgi apparatus membrane {ECO:0000250|UniProtKB:O14672}; Single-pass type I membrane protein {ECO:0000305}. Cytoplasmic vesicle, clathrin-coated vesicle {ECO:0000250|UniProtKB:O14672}. Cell projection, axon {ECO:0000269|Pub…	1	1	1	2	2	0
Q60718	ADAM2_MOUSE	Disintegrin and metalloproteinase domain-containing protein 2 (ADAM 2) (Fertilin subunit beta) (PH-30) (PH30) (PH30-beta)	Adam2	1	0.164308	0.0907771	0	adult behavior [GO:0030534]; binding of sperm to zona pellucida [GO:0007339]; cell adhesion [GO:0007155]; male gonad development [GO:0008584]; positive regulation of gene expression [GO:0010628]; proteolysis [GO:0006508]; visual learning [GO:0008542]	acrosomal vesicle [GO:0001669]; cell surface [GO:0009986]; plasma membrane [GO:0005886]; protein-containing complex [GO:0032991]	acrosomal vesicle [GO:0001669]; cell surface [GO:0009986]; plasma membrane [GO:0005886]; protein-containing complex [GO:0032991]; metalloendopeptidase activity [GO:0004222]; adult behavior [GO:0030534]; binding of sperm to zona pellucida [GO:0007339]; cell adhesion [GO:0007155]; male gonad development [GO:0008584]; positive regulation of gene expression [GO:0010628]; proteolysis [GO:0006508]; vis…	metalloendopeptidase activity [GO:0004222]	SUBCELLULAR LOCATION: Membrane; Single-pass type I membrane protein.	1	1	2	2	2	3
A0A087WRE7	A0A087WRE7_MOUSE	Hydroxyacid-oxoacid transhydrogenase, mitochondrial (EC 1.1.99.24) (Alcohol dehydrogenase iron-containing protein 1)	Adhfe1	0	1.39482	0.658649	0		mitochondrion [GO:0005739]	mitochondrion [GO:0005739]; alcohol dehydrogenase (NAD+) activity [GO:0004022]; hydroxyacid-oxoacid transhydrogenase activity [GO:0047988]; metal ion binding [GO:0046872]	alcohol dehydrogenase (NAD+) activity [GO:0004022]; hydroxyacid-oxoacid transhydrogenase activity [GO:0047988]; metal ion binding [GO:0046872]	SUBCELLULAR LOCATION: Mitochondrion {ECO:0000256|ARBA:ARBA00004173}.	9	10	8	11	11	11
Q640N1	AEBP1_MOUSE	Adipocyte enhancer-binding protein 1 (AE-binding protein 1) (Aortic carboxypeptidase-like protein)	Aebp1	0	2.62147	1.68373	0	negative regulation of transcription by RNA polymerase II [GO:0000122]; peptide metabolic process [GO:0006518]; protein processing [GO:0016485]; regulation of collagen fibril organization [GO:1904026]; regulation of DNA-templated transcription [GO:0006355]	cytoplasm [GO:0005737]; extracellular space [GO:0005615]; nucleus [GO:0005634]	cytoplasm [GO:0005737]; extracellular space [GO:0005615]; nucleus [GO:0005634]; calmodulin binding [GO:0005516]; carboxypeptidase activity [GO:0004180]; collagen binding [GO:0005518]; DNA-binding transcription repressor activity, RNA polymerase II-specific [GO:0001227]; metallocarboxypeptidase activity [GO:0004181]; RNA polymerase II transcription regulatory region sequence-specific DNA binding […	calmodulin binding [GO:0005516]; carboxypeptidase activity [GO:0004180]; collagen binding [GO:0005518]; DNA-binding transcription repressor activity, RNA polymerase II-specific [GO:0001227]; metallocarboxypeptidase activity [GO:0004181]; RNA polymerase II transcription regulatory region sequence-specific DNA binding [GO:0000977]; zinc ion binding [GO:0008270]	SUBCELLULAR LOCATION: [Isoform 1]: Secreted {ECO:0000269|PubMed:11438679, ECO:0000269|PubMed:15927179}.; SUBCELLULAR LOCATION: [Isoform 2]: Cytoplasm {ECO:0000269|PubMed:17202411, ECO:0000269|PubMed:9624159}. Nucleus {ECO:0000269|PubMed:17202411}.	5	6	8	11	11	13
Q9DBA8	HUTI_MOUSE	Probable imidazolonepropionase (EC 3.5.2.7) (Amidohydrolase domain-containing protein 1)	Amdhd1	1	0.340143	0.1471	0	histidine catabolic process [GO:0006548]; histidine catabolic process to glutamate and formamide [GO:0019556]; histidine catabolic process to glutamate and formate [GO:0019557]	cytoplasm [GO:0005737]	cytoplasm [GO:0005737]; imidazolonepropionase activity [GO:0050480]; metal ion binding [GO:0046872]; histidine catabolic process [GO:0006548]; histidine catabolic process to glutamate and formamide [GO:0019556]; histidine catabolic process to glutamate and formate [GO:0019557]	imidazolonepropionase activity [GO:0050480]; metal ion binding [GO:0046872]		19	21	19	21	18	15
Q9D7A8	ARMC1_MOUSE	Armadillo repeat-containing protein 1	Armc1	0	0.00590372	0.0114638	0	intracellular distribution of mitochondria [GO:0048312]	cytosol [GO:0005829]; mitochondrial outer membrane [GO:0005741]; mitochondrion [GO:0005739]	cytosol [GO:0005829]; mitochondrial outer membrane [GO:0005741]; mitochondrion [GO:0005739]; metal ion binding [GO:0046872]; intracellular distribution of mitochondria [GO:0048312]	metal ion binding [GO:0046872]	SUBCELLULAR LOCATION: Cytoplasm {ECO:0000250|UniProtKB:Q9NVT9}. Mitochondrion {ECO:0000250|UniProtKB:Q9NVT9}. Mitochondrion outer membrane {ECO:0000250|UniProtKB:Q9NVT9}. Note=Associates with the outer mitochondrion membrane, most likely through its C-terminus (By similarity). Not integrated into the mitochondrial outer membrane (By similarity). {ECO:0000250|UniProtKB:Q9NVT9}.	1	2	2	4	3	3
O35864	CSN5_MOUSE	COP9 signalosome complex subunit 5 (SGN5) (Signalosome subunit 5) (EC 3.4.-.-) (Jun activation domain-binding protein 1) (Kip1 C-terminus-interacting protein 2)	Cops5	0	0.962208	0.512455	0	exosomal secretion [GO:1990182]; negative regulation of apoptotic process [GO:0043066]; positive regulation of DNA-binding transcription factor activity [GO:0051091]; positive regulation of transcription by RNA polymerase II [GO:0045944]; protein deneddylation [GO:0000338]; proteolysis [GO:0006508]; regulation of cell cycle [GO:0051726]; regulation of DNA-templated transcription [GO:0006355]; reg…	chromatin [GO:0000785]; COP9 signalosome [GO:0008180]; cytoplasm [GO:0005737]; cytosol [GO:0005829]; nucleoplasm [GO:0005654]; nucleus [GO:0005634]; perinuclear region of cytoplasm [GO:0048471]; synaptic vesicle [GO:0008021]; transcription regulator complex [GO:0005667]	chromatin [GO:0000785]; COP9 signalosome [GO:0008180]; cytoplasm [GO:0005737]; cytosol [GO:0005829]; nucleoplasm [GO:0005654]; nucleus [GO:0005634]; perinuclear region of cytoplasm [GO:0048471]; synaptic vesicle [GO:0008021]; transcription regulator complex [GO:0005667]; deNEDDylase activity [GO:0019784]; enzyme binding [GO:0019899]; macrophage migration inhibitory factor binding [GO:0035718]; me…	deNEDDylase activity [GO:0019784]; enzyme binding [GO:0019899]; macrophage migration inhibitory factor binding [GO:0035718]; metal ion binding [GO:0046872]; metal-dependent deubiquitinase activity [GO:0140492]; metallopeptidase activity [GO:0008237]; transcription coactivator activity [GO:0003713]	SUBCELLULAR LOCATION: Cytoplasm, cytosol {ECO:0000269|PubMed:10721695}. Nucleus {ECO:0000269|PubMed:10721695}. Cytoplasm, perinuclear region {ECO:0000250|UniProtKB:Q92905}. Cytoplasmic vesicle, secretory vesicle, synaptic vesicle {ECO:0000250|UniProtKB:Q92905}. Note=Nuclear localization is diminished in the presence of IFIT3. {ECO:0000250|UniProtKB:Q92905}.	2	1	2	1	2	2
Q3UGR5	HDHD2_MOUSE	Haloacid dehalogenase-like hydrolase domain-containing protein 2	Hdhd2	0	0.0396085	0.132191	0	dephosphorylation [GO:0016311]		enzyme binding [GO:0019899]; metal ion binding [GO:0046872]; phosphatase activity [GO:0016791]; dephosphorylation [GO:0016311]	enzyme binding [GO:0019899]; metal ion binding [GO:0046872]; phosphatase activity [GO:0016791]		3	3	3	2	1	0
Q5NCY0	KDM6B_MOUSE	Lysine-specific demethylase 6B (EC 1.14.11.68) (JmjC domain-containing protein 3) (Jumonji domain-containing protein 3) ([histone H3]-trimethyl-L-lysine(27) demethylase 6B)	Kdm6b	0	0.531478	0.258394	0	cardiac muscle cell differentiation [GO:0055007]; cell fate commitment [GO:0045165]; cellular response to hydrogen peroxide [GO:0070301]; chromatin remodeling [GO:0006338]; endothelial cell differentiation [GO:0045446]; hippocampus development [GO:0021766]; inflammatory response to antigenic stimulus [GO:0002437]; mesodermal cell differentiation [GO:0048333]; positive regulation of cold-induced t…	MLL3/4 complex [GO:0044666]; nucleoplasm [GO:0005654]; nucleus [GO:0005634]	MLL3/4 complex [GO:0044666]; nucleoplasm [GO:0005654]; nucleus [GO:0005634]; beta-catenin binding [GO:0008013]; chromatin binding [GO:0003682]; chromatin DNA binding [GO:0031490]; histone H3K27me2/H3K27me3 demethylase activity [GO:0071558]; metal ion binding [GO:0046872]; RNA polymerase II cis-regulatory region sequence-specific DNA binding [GO:0000978]; sequence-specific DNA binding [GO:0043565]…	beta-catenin binding [GO:0008013]; chromatin binding [GO:0003682]; chromatin DNA binding [GO:0031490]; histone H3K27me2/H3K27me3 demethylase activity [GO:0071558]; metal ion binding [GO:0046872]; RNA polymerase II cis-regulatory region sequence-specific DNA binding [GO:0000978]; sequence-specific DNA binding [GO:0043565]	SUBCELLULAR LOCATION: Nucleus {ECO:0000250}.	6	5	8	5	9	10
Q8CC86	PNCB_MOUSE	Nicotinate phosphoribosyltransferase (NAPRTase) (EC 6.3.4.21) (Nicotinate phosphoribosyltransferase domain-containing protein 1)	Naprt	0	0.623162	0.409698	0	NAD biosynthetic process [GO:0009435]; NAD salvage [GO:0034355]; response to oxidative stress [GO:0006979]	cytosol [GO:0005829]	cytosol [GO:0005829]; metal ion binding [GO:0046872]; nicotinate phosphoribosyltransferase activity [GO:0004516]; transferase activity [GO:0016740]; NAD biosynthetic process [GO:0009435]; NAD salvage [GO:0034355]; response to oxidative stress [GO:0006979]	metal ion binding [GO:0046872]; nicotinate phosphoribosyltransferase activity [GO:0004516]; transferase activity [GO:0016740]	SUBCELLULAR LOCATION: Cytoplasm, cytosol {ECO:0000250|UniProtKB:Q6XQN6}.	12	8	8	8	8	8
Q8K4Z3	NNRE_MOUSE	NAD(P)H-hydrate epimerase (EC 5.1.99.6) (Apolipoprotein A-I-binding protein) (AI-BP) (NAD(P)HX epimerase)	Naxe	0	1.2999	0.904436	0	lipid transport [GO:0006869]; membrane raft distribution [GO:0031580]; negative regulation of angiogenesis [GO:0016525]; nicotinamide nucleotide metabolic process [GO:0046496]; regulation of cholesterol efflux [GO:0010874]; sprouting angiogenesis [GO:0002040]	cell body [GO:0044297]; cilium [GO:0005929]; extracellular region [GO:0005576]; extracellular space [GO:0005615]; mitochondrion [GO:0005739]	cell body [GO:0044297]; cilium [GO:0005929]; extracellular region [GO:0005576]; extracellular space [GO:0005615]; mitochondrion [GO:0005739]; identical protein binding [GO:0042802]; metal ion binding [GO:0046872]; NADHX epimerase activity [GO:0052856]; NADPHX epimerase activity [GO:0052857]; nucleotide binding [GO:0000166]; lipid transport [GO:0006869]; membrane raft distribution [GO:0031580]; ne…	identical protein binding [GO:0042802]; metal ion binding [GO:0046872]; NADHX epimerase activity [GO:0052856]; NADPHX epimerase activity [GO:0052857]; nucleotide binding [GO:0000166]	SUBCELLULAR LOCATION: Mitochondrion {ECO:0000255|HAMAP-Rule:MF_03159}. Secreted {ECO:0000255|HAMAP-Rule:MF_03159, ECO:0000269|PubMed:18202122, ECO:0000269|PubMed:18614015}. Note=In sperm, secretion gradually increases during capacitation.	2	2	2	1	1	1
Q8C165	P20D1_MOUSE	N-fatty-acyl-amino acid synthase/hydrolase PM20D1 (EC 3.5.1.114) (EC 3.5.1.14) (Peptidase M20 domain-containing protein 1) (PM20D1)	Pm20d1	0	0.574228	0.213512	0	adaptive thermogenesis [GO:1990845]; amide biosynthetic process [GO:0043604]; amide catabolic process [GO:0043605]; amino acid metabolic process [GO:0006520]; cellular lipid metabolic process [GO:0044255]; energy homeostasis [GO:0097009]; fatty acid metabolic process [GO:0006631]; proteolysis [GO:0006508]; respiratory electron transport chain [GO:0022904]	extracellular space [GO:0005615]	extracellular space [GO:0005615]; aminoacylase activity [GO:0004046]; hydrolase activity, acting on carbon-nitrogen (but not peptide) bonds, in linear amides [GO:0016811]; lyase activity [GO:0016829]; metal ion binding [GO:0046872]; peptidase activity [GO:0008233]; adaptive thermogenesis [GO:1990845]; amide biosynthetic process [GO:0043604]; amide catabolic process [GO:0043605]; amino acid metabo…	aminoacylase activity [GO:0004046]; hydrolase activity, acting on carbon-nitrogen (but not peptide) bonds, in linear amides [GO:0016811]; lyase activity [GO:0016829]; metal ion binding [GO:0046872]; peptidase activity [GO:0008233]	SUBCELLULAR LOCATION: Secreted {ECO:0000269|PubMed:27374330, ECO:0000269|PubMed:32271712, ECO:0000269|PubMed:32402239}.	16	16	17	18	18	19
Q9CQC9	SAR1B_MOUSE	GTP-binding protein SAR1b	Sar1b	0	1.79212	0.752813	0	endoplasmic reticulum to Golgi vesicle-mediated transport [GO:0006888]; intracellular protein transport [GO:0006886]; lipid homeostasis [GO:0055088]; lipoprotein transport [GO:0042953]; membrane organization [GO:0061024]; positive regulation of protein exit from endoplasmic reticulum [GO:0070863]; regulation of COPII vesicle coating [GO:0003400]; regulation of lipid transport [GO:0032368]; vesicl…	COPII vesicle coat [GO:0030127]; endoplasmic reticulum exit site [GO:0070971]; endoplasmic reticulum membrane [GO:0005789]; Golgi cisterna membrane [GO:0032580]	COPII vesicle coat [GO:0030127]; endoplasmic reticulum exit site [GO:0070971]; endoplasmic reticulum membrane [GO:0005789]; Golgi cisterna membrane [GO:0032580]; GTP binding [GO:0005525]; GTPase activity [GO:0003924]; metal ion binding [GO:0046872]; endoplasmic reticulum to Golgi vesicle-mediated transport [GO:0006888]; intracellular protein transport [GO:0006886]; lipid homeostasis [GO:0055088];…	GTP binding [GO:0005525]; GTPase activity [GO:0003924]; metal ion binding [GO:0046872]	SUBCELLULAR LOCATION: Endoplasmic reticulum membrane {ECO:0000269|PubMed:11422940}; Peripheral membrane protein {ECO:0000269|PubMed:11422940}. Golgi apparatus, Golgi stack membrane {ECO:0000269|PubMed:11422940}; Peripheral membrane protein {ECO:0000269|PubMed:11422940}. Note=Associated with the endoplasmic reticulum and Golgi stacks, in particular in the juxta-nuclear Golgi region. {ECO:0000250|U…	4	4	3	5	6	4
Q99LQ4	SVBP_MOUSE	Small vasohibin-binding protein (Coiled coil domain-containing protein 23)	Svbp	0	1.8604	0.592131	0	axon development [GO:0061564]; brain development [GO:0007420]; negative regulation of endothelial cell migration [GO:0010596]; negative regulation of protein ubiquitination [GO:0031397]; protein secretion [GO:0009306]; proteolysis [GO:0006508]; regulation of metallopeptidase activity [GO:1905048]	apical part of cell [GO:0045177]; cytoplasm [GO:0005737]; cytoskeleton [GO:0005856]; extracellular region [GO:0005576]	apical part of cell [GO:0045177]; cytoplasm [GO:0005737]; cytoskeleton [GO:0005856]; extracellular region [GO:0005576]; microtubule binding [GO:0008017]; peptidase activator activity [GO:0016504]; axon development [GO:0061564]; brain development [GO:0007420]; negative regulation of endothelial cell migration [GO:0010596]; negative regulation of protein ubiquitination [GO:0031397]; protein secreti…	microtubule binding [GO:0008017]; peptidase activator activity [GO:0016504]	SUBCELLULAR LOCATION: Cytoplasm {ECO:0000269|PubMed:20736312}. Secreted {ECO:0000269|PubMed:20736312}. Cytoplasm, cytoskeleton {ECO:0000250|UniProtKB:Q8N300}. Note=Detected both intracellularly and extracellularly (PubMed:20736312). Within cells, localizes mainly to the apical part of the cell (PubMed:20736312). {ECO:0000269|PubMed:20736312}.	19	19	20	20	17	19
Q9D0L4	ADCK1_MOUSE	AarF domain-containing protein kinase 1 (EC 2.7.-.-)	Adck1	0	2.14621	0.649975	1	lipid homeostasis [GO:0055088]; mitochondrion organization [GO:0007005]; negative regulation of mitochondrial fusion [GO:0010637]; phosphorylation [GO:0016310]; positive regulation of cristae formation [GO:1903852]	mitochondrial inner membrane [GO:0005743]; mitochondrion [GO:0005739]	mitochondrial inner membrane [GO:0005743]; mitochondrion [GO:0005739]; ATP binding [GO:0005524]; protein serine/threonine kinase activity [GO:0004674]; lipid homeostasis [GO:0055088]; mitochondrion organization [GO:0007005]; negative regulation of mitochondrial fusion [GO:0010637]; phosphorylation [GO:0016310]; positive regulation of cristae formation [GO:1903852]	ATP binding [GO:0005524]; protein serine/threonine kinase activity [GO:0004674]	SUBCELLULAR LOCATION: Mitochondrion {ECO:0000250|UniProtKB:Q86TW2}.	23	21	20	21	19	18
Q6NSR3	ADCK2_MOUSE	Uncharacterized aarF domain-containing protein kinase 2 (EC 2.7.11.-)	Adck2	0	1.57822	1.50132	1	phosphorylation [GO:0016310]; regulation of ubiquinone biosynthetic process [GO:0010795]	membrane [GO:0016020]; mitochondrion [GO:0005739]	membrane [GO:0016020]; mitochondrion [GO:0005739]; ATP binding [GO:0005524]; protein serine/threonine kinase activity [GO:0004674]; phosphorylation [GO:0016310]; regulation of ubiquinone biosynthetic process [GO:0010795]	ATP binding [GO:0005524]; protein serine/threonine kinase activity [GO:0004674]	SUBCELLULAR LOCATION: Mitochondrion {ECO:0000269|PubMed:31480808}. Membrane {ECO:0000255}; Single-pass membrane protein {ECO:0000255}.	5	3	4	6	6	5
P30416	FKBP4_MOUSE	Peptidyl-prolyl cis-trans isomerase FKBP4 (PPIase FKBP4) (EC 5.2.1.8) (52 kDa FK506-binding protein) (52 kDa FKBP) (FKBP-52) (59 kDa immunophilin) (p59) (FK506-binding protein 4) (FKBP-4) (FKBP59) (HSP-binding immunophilin) (HBI) (Immunophilin FKBP52) (Rotamase) [Cleaved into: Peptidyl-prolyl cis-trans isomerase FKBP4, N-terminally processed]	Fkbp4	0	0.844299	0.717162	1	androgen receptor signaling pathway [GO:0030521]; chaperone-mediated protein folding [GO:0061077]; copper ion transport [GO:0006825]; embryo implantation [GO:0007566]; male sex differentiation [GO:0046661]; negative regulation of microtubule polymerization [GO:0031115]; negative regulation of microtubule polymerization or depolymerization [GO:0031111]; negative regulation of neuron projection dev…	axonal growth cone [GO:0044295]; cytoplasm [GO:0005737]; cytosol [GO:0005829]; microtubule [GO:0005874]; mitochondrion [GO:0005739]; neuronal cell body [GO:0043025]; nucleoplasm [GO:0005654]; nucleus [GO:0005634]; perinuclear region of cytoplasm [GO:0048471]; protein-containing complex [GO:0032991]	axonal growth cone [GO:0044295]; cytoplasm [GO:0005737]; cytosol [GO:0005829]; microtubule [GO:0005874]; mitochondrion [GO:0005739]; neuronal cell body [GO:0043025]; nucleoplasm [GO:0005654]; nucleus [GO:0005634]; perinuclear region of cytoplasm [GO:0048471]; protein-containing complex [GO:0032991]; ATP binding [GO:0005524]; copper-dependent protein binding [GO:0032767]; GTP binding [GO:0005525];…	ATP binding [GO:0005524]; copper-dependent protein binding [GO:0032767]; GTP binding [GO:0005525]; heat shock protein binding [GO:0031072]; nuclear glucocorticoid receptor binding [GO:0035259]; peptidyl-prolyl cis-trans isomerase activity [GO:0003755]; phosphoprotein binding [GO:0051219]; tau protein binding [GO:0048156]	SUBCELLULAR LOCATION: Cytoplasm, cytosol {ECO:0000269|PubMed:11751894}. Mitochondrion {ECO:0000250|UniProtKB:Q02790}. Nucleus {ECO:0000269|PubMed:11751894, ECO:0000269|PubMed:8341706}. Cytoplasm, cytoskeleton {ECO:0000250}. Note=Shuttles from mitochondria to nucleus; co-localizes in mitochondria with the glucocorticoid receptor. Colocalized with MAPT/TAU in the distal part of the primary cortical…	2	5	2	5	6	3
P97855	G3BP1_MOUSE	Ras GTPase-activating protein-binding protein 1 (G3BP-1) (EC 3.6.4.12) (EC 3.6.4.13) (ATP-dependent DNA helicase VIII) (GAP SH3 domain-binding protein 1) (HDH-VIII)	G3bp1	0	0.615292	0.257857	1	defense response to virus [GO:0051607]; innate immune response [GO:0045087]; negative regulation of canonical Wnt signaling pathway [GO:0090090]; positive regulation of stress granule assembly [GO:0062029]; positive regulation of type I interferon production [GO:0032481]; stress granule assembly [GO:0034063]	cytoplasm [GO:0005737]; cytoplasmic stress granule [GO:0010494]; cytosol [GO:0005829]; nucleus [GO:0005634]; perikaryon [GO:0043204]; ribonucleoprotein complex [GO:1990904]	cytoplasm [GO:0005737]; cytoplasmic stress granule [GO:0010494]; cytosol [GO:0005829]; nucleus [GO:0005634]; perikaryon [GO:0043204]; ribonucleoprotein complex [GO:1990904]; ATP binding [GO:0005524]; ATP hydrolysis activity [GO:0016887]; DNA binding [GO:0003677]; DNA helicase activity [GO:0003678]; DNA/RNA helicase activity [GO:0033677]; endonuclease activity [GO:0004519]; molecular condensate sc…	ATP binding [GO:0005524]; ATP hydrolysis activity [GO:0016887]; DNA binding [GO:0003677]; DNA helicase activity [GO:0003678]; DNA/RNA helicase activity [GO:0033677]; endonuclease activity [GO:0004519]; molecular condensate scaffold activity [GO:0140693]; mRNA binding [GO:0003729]; ribosomal small subunit binding [GO:0043024]; RNA helicase activity [GO:0003724]	SUBCELLULAR LOCATION: Cytoplasm, cytosol {ECO:0000269|PubMed:15086518, ECO:0000269|PubMed:8649363}. Perikaryon {ECO:0000269|PubMed:15086518}. Cytoplasm, Stress granule {ECO:0000250|UniProtKB:Q13283}. Nucleus {ECO:0000250|UniProtKB:Q13283}. Note=Cytoplasmic in proliferating cells, can be recruited to the plasma membrane in exponentially growing cells. Cytosolic and partially nuclear in resting cel…	3	2	4	5	3	4
Q8VCE2	GPN1_MOUSE	GPN-loop GTPase 1 (EC 3.6.5.-) (MBD2-interacting protein) (MBDin) (XPA-binding protein 1)	Gpn1	0	1.76585	0.531466	1		cytosol [GO:0005829]; mitochondrion [GO:0005739]; nucleoplasm [GO:0005654]	cytosol [GO:0005829]; mitochondrion [GO:0005739]; nucleoplasm [GO:0005654]; ATP hydrolysis activity [GO:0016887]; GTP binding [GO:0005525]; GTPase activity [GO:0003924]	ATP hydrolysis activity [GO:0016887]; GTP binding [GO:0005525]; GTPase activity [GO:0003924]	SUBCELLULAR LOCATION: Cytoplasm {ECO:0000250|UniProtKB:Q9HCN4}. Nucleus {ECO:0000250|UniProtKB:Q9HCN4}. Note=Shuttles between the nucleus and the cytoplasm. {ECO:0000250|UniProtKB:Q9HCN4}.	20	16	16	16	15	16
P20029	BIP_MOUSE	Endoplasmic reticulum chaperone BiP (EC 3.6.4.10) (78 kDa glucose-regulated protein) (GRP-78) (Binding-immunoglobulin protein) (BiP) (Heat shock protein 70 family protein 5) (HSP70 family protein 5) (Heat shock protein family A member 5) (Immunoglobulin heavy chain-binding protein)	Hspa5	0	1.73247	0.686812	1	cellular response to glucose starvation [GO:0042149]; cellular response to interleukin-4 [GO:0071353]; cerebellar Purkinje cell layer development [GO:0021680]; cerebellum structural organization [GO:0021589]; chaperone cofactor-dependent protein refolding [GO:0051085]; endoplasmic reticulum unfolded protein response [GO:0030968]; ER overload response [GO:0006983]; maintenance of protein localizat…	cell surface [GO:0009986]; COP9 signalosome [GO:0008180]; cytoplasm [GO:0005737]; cytosol [GO:0005829]; endoplasmic reticulum [GO:0005783]; endoplasmic reticulum chaperone complex [GO:0034663]; endoplasmic reticulum lumen [GO:0005788]; endoplasmic reticulum membrane [GO:0005789]; endoplasmic reticulum-Golgi intermediate compartment [GO:0005793]; extracellular region [GO:0005576]; intracellular me…	cell surface [GO:0009986]; COP9 signalosome [GO:0008180]; cytoplasm [GO:0005737]; cytosol [GO:0005829]; endoplasmic reticulum [GO:0005783]; endoplasmic reticulum chaperone complex [GO:0034663]; endoplasmic reticulum lumen [GO:0005788]; endoplasmic reticulum membrane [GO:0005789]; endoplasmic reticulum-Golgi intermediate compartment [GO:0005793]; extracellular region [GO:0005576]; intracellular me…	ATP binding [GO:0005524]; ATP hydrolysis activity [GO:0016887]; ATP-dependent protein folding chaperone [GO:0140662]; enzyme binding [GO:0019899]; heat shock protein binding [GO:0031072]; misfolded protein binding [GO:0051787]; protein domain specific binding [GO:0019904]; protein folding chaperone [GO:0044183]; ribosome binding [GO:0043022]; ubiquitin protein ligase binding [GO:0031625]; unfolde…	SUBCELLULAR LOCATION: Endoplasmic reticulum lumen {ECO:0000255|PROSITE-ProRule:PRU10138, ECO:0000269|PubMed:21992152}. Melanosome {ECO:0000250|UniProtKB:P11021}. Cytoplasm {ECO:0000269|PubMed:21992152}. Cell surface. Note=Identified by mass spectrometry in melanosome fractions from stage I to stage IV (By similarity). Localizes to the cell surface in epithelial cells; high levels of free iron pro…	42	41	43	44	43	41
Q9JKR6	HYOU1_MOUSE	Hypoxia up-regulated protein 1 (GRP-170) (140 kDa Ca(2+)-binding protein) (CBP-140)	Hyou1	0	2.47259	0.831676	1	cellular response to hypoxia [GO:0071456]; endoplasmic reticulum to Golgi vesicle-mediated transport [GO:0006888]; negative regulation of apoptotic process [GO:0043066]; negative regulation of endoplasmic reticulum stress-induced neuron intrinsic apoptotic signaling pathway [GO:1903382]; negative regulation of hypoxia-induced intrinsic apoptotic signaling pathway [GO:1903298]; response to endopla…	endoplasmic reticulum chaperone complex [GO:0034663]; endoplasmic reticulum lumen [GO:0005788]; extracellular region [GO:0005576]; smooth endoplasmic reticulum [GO:0005790]	endoplasmic reticulum chaperone complex [GO:0034663]; endoplasmic reticulum lumen [GO:0005788]; extracellular region [GO:0005576]; smooth endoplasmic reticulum [GO:0005790]; adenyl-nucleotide exchange factor activity [GO:0000774]; ATP binding [GO:0005524]; ATP-dependent protein folding chaperone [GO:0140662]; cellular response to hypoxia [GO:0071456]; endoplasmic reticulum to Golgi vesicle-mediat…	adenyl-nucleotide exchange factor activity [GO:0000774]; ATP binding [GO:0005524]; ATP-dependent protein folding chaperone [GO:0140662]	SUBCELLULAR LOCATION: Endoplasmic reticulum lumen {ECO:0000269|PubMed:7641295}.	23	24	25	31	32	29
J3QMM7	J3QMM7_MOUSE	ATP-dependent (S)-NAD(P)H-hydrate dehydratase (EC 4.2.1.93) (ATP-dependent NAD(P)HX dehydratase) (Carbohydrate kinase domain-containing protein)	Naxd	0	0.113268	0.0714334	1	nicotinamide nucleotide metabolic process [GO:0046496]	mitochondrion [GO:0005739]	mitochondrion [GO:0005739]; ATP binding [GO:0005524]; ATP-dependent NAD(P)H-hydrate dehydratase activity [GO:0047453]; kinase activity [GO:0016301]; nicotinamide nucleotide metabolic process [GO:0046496]	ATP binding [GO:0005524]; ATP-dependent NAD(P)H-hydrate dehydratase activity [GO:0047453]; kinase activity [GO:0016301]	SUBCELLULAR LOCATION: Mitochondrion {ECO:0000256|HAMAP-Rule:MF_03157}.	7	5	6	5	4	2
P54775	PRS6B_MOUSE	26S proteasome regulatory subunit 6B (26S proteasome AAA-ATPase subunit RPT3) (CIP21) (MB67-interacting protein) (MIP224) (Proteasome 26S subunit ATPase 4) (Tat-binding protein 7) (TBP-7)	Psmc4	0	1.41707	1.1985	1	blastocyst development [GO:0001824]; proteasome-mediated ubiquitin-dependent protein catabolic process [GO:0043161]	cytosol [GO:0005829]; cytosolic proteasome complex [GO:0031597]; inclusion body [GO:0016234]; nucleoplasm [GO:0005654]; proteasome accessory complex [GO:0022624]; proteasome complex [GO:0000502]; proteasome regulatory particle, base subcomplex [GO:0008540]; synapse [GO:0045202]	cytosol [GO:0005829]; cytosolic proteasome complex [GO:0031597]; inclusion body [GO:0016234]; nucleoplasm [GO:0005654]; proteasome accessory complex [GO:0022624]; proteasome complex [GO:0000502]; proteasome regulatory particle, base subcomplex [GO:0008540]; synapse [GO:0045202]; ATP binding [GO:0005524]; ATP hydrolysis activity [GO:0016887]; proteasome-activating activity [GO:0036402]; blastocyst…	ATP binding [GO:0005524]; ATP hydrolysis activity [GO:0016887]; proteasome-activating activity [GO:0036402]	SUBCELLULAR LOCATION: Cytoplasm {ECO:0000250|UniProtKB:P43686}. Nucleus {ECO:0000250|UniProtKB:P43686}.	0	0	0	1	3	2
Q60972	RBBP4_MOUSE	Histone-binding protein RBBP4 (Chromatin assembly factor 1 subunit C) (CAF-1 subunit C) (Chromatin assembly factor I p48 subunit) (CAF-I 48 kDa subunit) (CAF-I p48) (Nucleosome-remodeling factor subunit RBAP48) (Retinoblastoma-binding protein 4) (RBBP-4) (Retinoblastoma-binding protein p48)	Rbbp4	0	1.70575	0.554118	1	brain development [GO:0007420]; cell cycle [GO:0007049]; chromatin remodeling [GO:0006338]; DNA replication [GO:0006260]; DNA replication-dependent chromatin assembly [GO:0006335]; negative regulation of cell migration [GO:0030336]; negative regulation of DNA-templated transcription [GO:0045892]; negative regulation of stem cell population maintenance [GO:1902455]; negative regulation of transcri…	ATPase complex [GO:1904949]; CAF-1 complex [GO:0033186]; chromatin [GO:0000785]; chromosome, telomeric region [GO:0000781]; cytosol [GO:0005829]; ESC/E(Z) complex [GO:0035098]; histone deacetylase complex [GO:0000118]; nucleoplasm [GO:0005654]; nucleus [GO:0005634]; NuRD complex [GO:0016581]; NURF complex [GO:0016589]; protein-containing complex [GO:0032991]	ATPase complex [GO:1904949]; CAF-1 complex [GO:0033186]; chromatin [GO:0000785]; chromosome, telomeric region [GO:0000781]; cytosol [GO:0005829]; ESC/E(Z) complex [GO:0035098]; histone deacetylase complex [GO:0000118]; nucleoplasm [GO:0005654]; nucleus [GO:0005634]; NuRD complex [GO:0016581]; NURF complex [GO:0016589]; protein-containing complex [GO:0032991]; ATP-dependent activity, acting on DNA…	ATP-dependent activity, acting on DNA [GO:0008094]; histone binding [GO:0042393]; histone deacetylase binding [GO:0042826]; RNA polymerase II cis-regulatory region sequence-specific DNA binding [GO:0000978]	SUBCELLULAR LOCATION: Nucleus {ECO:0000250|UniProtKB:Q09028}. Chromosome, telomere {ECO:0000250|UniProtKB:Q09028}. Note=Localizes to chromatin as part of the PRC2 complex. {ECO:0000250|UniProtKB:Q09028}.	3	5	3	4	4	3
E9PWW2	E9PWW2_MOUSE	Torsin-1A-interacting protein 1	Tor1aip1	1	0.132651	0.0726426	1		nuclear inner membrane [GO:0005637]	nuclear inner membrane [GO:0005637]; ATPase activator activity [GO:0001671]	ATPase activator activity [GO:0001671]	SUBCELLULAR LOCATION: Membrane {ECO:0000256|ARBA:ARBA00004167}; Single-pass membrane protein {ECO:0000256|ARBA:ARBA00004167}. Nucleus inner membrane {ECO:0000256|ARBA:ARBA00037876}; Single-pass membrane protein {ECO:0000256|ARBA:ARBA00037876}.	2	4	3	3	4	3
Q8BYU6	TOIP2_MOUSE	Torsin-1A-interacting protein 2	Tor1aip2	1	0.0554201	0.0303364	1	endoplasmic reticulum organization [GO:0007029]; membrane organization [GO:0061024]; positive regulation of ATP-dependent activity [GO:0032781]; protein localization to nuclear envelope [GO:0090435]	endoplasmic reticulum [GO:0005783]; endoplasmic reticulum membrane [GO:0005789]; membrane [GO:0016020]; nuclear envelope [GO:0005635]	endoplasmic reticulum [GO:0005783]; endoplasmic reticulum membrane [GO:0005789]; membrane [GO:0016020]; nuclear envelope [GO:0005635]; ATPase activator activity [GO:0001671]; ATPase binding [GO:0051117]; endoplasmic reticulum organization [GO:0007029]; membrane organization [GO:0061024]; positive regulation of ATP-dependent activity [GO:0032781]; protein localization to nuclear envelope [GO:00904…	ATPase activator activity [GO:0001671]; ATPase binding [GO:0051117]	SUBCELLULAR LOCATION: Endoplasmic reticulum membrane {ECO:0000250}; Single-pass membrane protein {ECO:0000250}. Nucleus envelope {ECO:0000250}.	5	5	4	4	5	4
Q01853	TERA_MOUSE	Transitional endoplasmic reticulum ATPase (TER ATPase) (EC 3.6.4.6) (15S Mg(2+)-ATPase p97 subunit) (Valosin-containing protein) (VCP)	Vcp	0	0.636746	0.320084	1	aggresome assembly [GO:0070842]; ATP metabolic process [GO:0046034]; autophagosome maturation [GO:0097352]; autophagy [GO:0006914]; cellular response to arsenite ion [GO:1903843]; cellular response to heat [GO:0034605]; DNA damage response [GO:0006974]; DNA repair [GO:0006281]; double-strand break repair [GO:0006302]; endoplasmic reticulum stress-induced pre-emptive quality control [GO:0061857]; …	ATPase complex [GO:1904949]; cytoplasm [GO:0005737]; cytoplasmic stress granule [GO:0010494]; cytosol [GO:0005829]; Derlin-1 retrotranslocation complex [GO:0036513]; endoplasmic reticulum [GO:0005783]; endoplasmic reticulum membrane [GO:0005789]; glutamatergic synapse [GO:0098978]; lipid droplet [GO:0005811]; myelin sheath [GO:0043209]; nucleoplasm [GO:0005654]; nucleus [GO:0005634]; perinuclear …	ATPase complex [GO:1904949]; cytoplasm [GO:0005737]; cytoplasmic stress granule [GO:0010494]; cytosol [GO:0005829]; Derlin-1 retrotranslocation complex [GO:0036513]; endoplasmic reticulum [GO:0005783]; endoplasmic reticulum membrane [GO:0005789]; glutamatergic synapse [GO:0098978]; lipid droplet [GO:0005811]; myelin sheath [GO:0043209]; nucleoplasm [GO:0005654]; nucleus [GO:0005634]; perinuclear …	ADP binding [GO:0043531]; ATP binding [GO:0005524]; ATP hydrolysis activity [GO:0016887]; BAT3 complex binding [GO:1904288]; deubiquitinase activator activity [GO:0035800]; identical protein binding [GO:0042802]; K48-linked polyubiquitin modification-dependent protein binding [GO:0036435]; lipid binding [GO:0008289]; MHC class I protein binding [GO:0042288]; polyubiquitin modification-dependent p…	SUBCELLULAR LOCATION: Cytoplasm, cytosol {ECO:0000250|UniProtKB:P55072}. Endoplasmic reticulum {ECO:0000250|UniProtKB:P55072}. Nucleus {ECO:0000250|UniProtKB:P55072}. Cytoplasm, Stress granule {ECO:0000250|UniProtKB:P55072}. Nucleus {ECO:0000269|PubMed:33590678}. Note=Recruited to the cytoplasmic surface of the endoplasmic reticulum via interaction with AMFR/gp78. Following DNA double-strand brea…	55	58	57	56	54	50
Q9QZC8	ABHD1_MOUSE	Protein ABHD1 (EC 3.1.1.-) (Alpha/beta hydrolase domain-containing protein 1) (Abhydrolase domain-containing protein 1) (Lung alpha/beta hydrolase 1) (MmLABH1)	Abhd1	2	0.105566	-0.214123	0	medium-chain fatty acid biosynthetic process [GO:0051792]; medium-chain fatty acid catabolic process [GO:0051793]	membrane [GO:0016020]	membrane [GO:0016020]; acetylesterase activity [GO:0008126]; acylglycerol lipase activity [GO:0047372]; medium-chain fatty acid biosynthetic process [GO:0051792]; medium-chain fatty acid catabolic process [GO:0051793]	acetylesterase activity [GO:0008126]; acylglycerol lipase activity [GO:0047372]	SUBCELLULAR LOCATION: Membrane {ECO:0000305}; Single-pass type II membrane protein {ECO:0000305}.	2	2	1	0	2	2
Q8VCR7	ABHEB_MOUSE	Putative protein-lysine deacylase ABHD14B (EC 2.3.1.-) (Alpha/beta hydrolase domain-containing protein 14B) (Abhydrolase domain-containing protein 14B)	Abhd14b	0	0.185145	0.252005	0	positive regulation of transcription by RNA polymerase II [GO:0045944]	cytoplasm [GO:0005737]; cytosol [GO:0005829]; nucleolus [GO:0005730]; nucleoplasm [GO:0005654]; nucleus [GO:0005634]	cytoplasm [GO:0005737]; cytosol [GO:0005829]; nucleolus [GO:0005730]; nucleoplasm [GO:0005654]; nucleus [GO:0005634]; hydrolase activity [GO:0016787]; peptide-lysine-N-acetyltransferase activity [GO:0061733]; positive regulation of transcription by RNA polymerase II [GO:0045944]	hydrolase activity [GO:0016787]; peptide-lysine-N-acetyltransferase activity [GO:0061733]	SUBCELLULAR LOCATION: Cytoplasm {ECO:0000250|UniProtKB:Q96IU4}. Nucleus {ECO:0000250|UniProtKB:Q96IU4}. Note=Predominantly cytoplasmic. {ECO:0000250|UniProtKB:Q96IU4}.	4	3	2	3	3	3
Q9DBL9	ABHD5_MOUSE	1-acylglycerol-3-phosphate O-acyltransferase ABHD5 (EC 2.3.1.51) (Abhydrolase domain-containing protein 5) (Lipid droplet-binding protein CGI-58) (Protein CGI-58)	Abhd5	0	2.61831	3.46974	0	cell differentiation [GO:0030154]; fatty acid metabolic process [GO:0006631]; lipid homeostasis [GO:0055088]; lipid metabolic process [GO:0006629]; negative regulation of sequestering of triglyceride [GO:0010891]; phosphatidic acid biosynthetic process [GO:0006654]; positive regulation of lipid catabolic process [GO:0050996]; positive regulation of triglyceride catabolic process [GO:0010898]	cytosol [GO:0005829]; intracellular membrane-bounded organelle [GO:0043231]; lipid droplet [GO:0005811]; mitochondrion [GO:0005739]; nucleoplasm [GO:0005654]	cytosol [GO:0005829]; intracellular membrane-bounded organelle [GO:0043231]; lipid droplet [GO:0005811]; mitochondrion [GO:0005739]; nucleoplasm [GO:0005654]; 1-acylglycerol-3-phosphate O-acyltransferase activity [GO:0003841]; carboxylic ester hydrolase activity [GO:0052689]; lipase activator activity [GO:0060229]; lysophosphatidic acid acyltransferase activity [GO:0042171]; cell differentiation …	1-acylglycerol-3-phosphate O-acyltransferase activity [GO:0003841]; carboxylic ester hydrolase activity [GO:0052689]; lipase activator activity [GO:0060229]; lysophosphatidic acid acyltransferase activity [GO:0042171]	SUBCELLULAR LOCATION: Cytoplasm. Lipid droplet {ECO:0000269|PubMed:18606822}. Cytoplasm, cytosol {ECO:0000269|PubMed:18606822}. Note=Colocalized with PLIN and ADRP on the surface of lipid droplets. The localization is dependent upon the metabolic status of the adipocytes and the activity of PKA.	3	1	2	6	5	5
E9QNH7	E9QNH7_MOUSE	Acyl-CoA-binding domain-containing protein 5	Acbd5	1	0.472102	0.732865	0	pexophagy [GO:0000425]	peroxisomal membrane [GO:0005778]	peroxisomal membrane [GO:0005778]; fatty-acyl-CoA binding [GO:0000062]; pexophagy [GO:0000425]	fatty-acyl-CoA binding [GO:0000062]	SUBCELLULAR LOCATION: Membrane {ECO:0000256|ARBA:ARBA00004167}; Single-pass membrane protein {ECO:0000256|ARBA:ARBA00004167}. Peroxisome membrane {ECO:0000256|ARBA:ARBA00004549}; Single-pass membrane protein {ECO:0000256|ARBA:ARBA00004549}.	0	1	1	1	1	3
A1BN54	A1BN54_MOUSE	Alpha-actinin-1 (Alpha-actinin cytoskeletal isoform) (F-actin cross-linking protein) (Non-muscle alpha-actinin-1)	Actn1	0	1.29203	0.360348	0		anchoring junction [GO:0070161]; cytoskeleton [GO:0005856]; plasma membrane [GO:0005886]; ruffle [GO:0001726]; Z disc [GO:0030018]	anchoring junction [GO:0070161]; cytoskeleton [GO:0005856]; plasma membrane [GO:0005886]; ruffle [GO:0001726]; Z disc [GO:0030018]; actin binding [GO:0003779]; calcium ion binding [GO:0005509]	actin binding [GO:0003779]; calcium ion binding [GO:0005509]	SUBCELLULAR LOCATION: Cell junction {ECO:0000256|ARBA:ARBA00004282}. Cell membrane {ECO:0000256|ARBA:ARBA00004236}. Cell projection, ruffle {ECO:0000256|ARBA:ARBA00004466}. Cytoplasm, myofibril, sarcomere, Z line {ECO:0000256|ARBA:ARBA00004216}. Membrane {ECO:0000256|ARBA:ARBA00004370}.	6	4	6	6	7	6
P50247	SAHH_MOUSE	Adenosylhomocysteinase (AdoHcyase) (EC 3.13.2.1) (CUBP) (Liver copper-binding protein) (S-adenosyl-L-homocysteine hydrolase)	Ahcy	0	3.07575	1.72048	0	chronic inflammatory response to antigenic stimulus [GO:0002439]; circadian sleep/wake cycle [GO:0042745]; one-carbon metabolic process [GO:0006730]; response to nutrient [GO:0007584]; S-adenosylhomocysteine catabolic process [GO:0019510]; S-adenosylmethionine cycle [GO:0033353]	cytosol [GO:0005829]; endoplasmic reticulum [GO:0005783]; melanosome [GO:0042470]; nucleus [GO:0005634]	cytosol [GO:0005829]; endoplasmic reticulum [GO:0005783]; melanosome [GO:0042470]; nucleus [GO:0005634]; adenosylhomocysteinase activity [GO:0004013]; adenyl nucleotide binding [GO:0030554]; copper ion binding [GO:0005507]; identical protein binding [GO:0042802]; NAD binding [GO:0051287]; protein self-association [GO:0043621]; chronic inflammatory response to antigenic stimulus [GO:0002439]; circ…	adenosylhomocysteinase activity [GO:0004013]; adenyl nucleotide binding [GO:0030554]; copper ion binding [GO:0005507]; identical protein binding [GO:0042802]; NAD binding [GO:0051287]; protein self-association [GO:0043621]	SUBCELLULAR LOCATION: Cytoplasm {ECO:0000250|UniProtKB:P23526}. Melanosome {ECO:0000250|UniProtKB:P23526}. Nucleus {ECO:0000250|UniProtKB:P23526}. Endoplasmic reticulum {ECO:0000250|UniProtKB:P23526}.	17	17	16	20	21	20
Q9WVQ5	MTNB_MOUSE	Methylthioribulose-1-phosphate dehydratase (MTRu-1-P dehydratase) (EC 4.2.1.109) (APAF1-interacting protein) (Monocyte/macrophage protein 19)	Apip	0	0.955091	1.59023	0	apoptotic process [GO:0006915]; L-methionine salvage from methylthioadenosine [GO:0019509]; L-methionine salvage from S-adenosylmethionine [GO:0019284]; negative regulation of apoptotic process [GO:0043066]; protein homotetramerization [GO:0051289]; pyroptosis [GO:0070269]; regulation of ERK1 and ERK2 cascade [GO:0070372]	cytoplasm [GO:0005737]	cytoplasm [GO:0005737]; identical protein binding [GO:0042802]; methylthioribulose 1-phosphate dehydratase activity [GO:0046570]; zinc ion binding [GO:0008270]; apoptotic process [GO:0006915]; L-methionine salvage from methylthioadenosine [GO:0019509]; L-methionine salvage from S-adenosylmethionine [GO:0019284]; negative regulation of apoptotic process [GO:0043066]; protein homotetramerization [G…	identical protein binding [GO:0042802]; methylthioribulose 1-phosphate dehydratase activity [GO:0046570]; zinc ion binding [GO:0008270]	SUBCELLULAR LOCATION: Cytoplasm {ECO:0000255|HAMAP-Rule:MF_03116}.	1	1	1	2	1	2
Q01339	APOH_MOUSE	Beta-2-glycoprotein 1 (APC inhibitor) (Activated protein C-binding protein) (Apolipoprotein H) (Apo-H) (Beta-2-glycoprotein I) (B2GPI) (Beta(2)GPI)	Apoh	0	0.640758	0.221511	0	animal organ regeneration [GO:0031100]; blood coagulation, intrinsic pathway [GO:0007597]; negative regulation of angiogenesis [GO:0016525]; negative regulation of blood coagulation [GO:0030195]; negative regulation of endothelial cell migration [GO:0010596]; negative regulation of endothelial cell proliferation [GO:0001937]; negative regulation of fibrinolysis [GO:0051918]; negative regulation o…	cell surface [GO:0009986]; chylomicron [GO:0042627]; extracellular space [GO:0005615]; high-density lipoprotein particle [GO:0034364]; very-low-density lipoprotein particle [GO:0034361]	cell surface [GO:0009986]; chylomicron [GO:0042627]; extracellular space [GO:0005615]; high-density lipoprotein particle [GO:0034364]; very-low-density lipoprotein particle [GO:0034361]; heparin binding [GO:0008201]; identical protein binding [GO:0042802]; lipid binding [GO:0008289]; lipoprotein lipase activator activity [GO:0060230]; phospholipid binding [GO:0005543]; animal organ regeneration […	heparin binding [GO:0008201]; identical protein binding [GO:0042802]; lipid binding [GO:0008289]; lipoprotein lipase activator activity [GO:0060230]; phospholipid binding [GO:0005543]	SUBCELLULAR LOCATION: Secreted.	10	11	10	7	7	7
Q5FWK3	RHG01_MOUSE	Rho GTPase-activating protein 1 (Rho-type GTPase-activating protein 1)	Arhgap1	1	0.957172	0.550927	0	endosomal transport [GO:0016197]; negative regulation of endocytic recycling [GO:2001136]; small GTPase mediated signal transduction [GO:0007264]; transferrin transport [GO:0033572]	cell leading edge [GO:0031252]; cytoplasm [GO:0005737]; endosome membrane [GO:0010008]; perinuclear region of cytoplasm [GO:0048471]; plasma membrane [GO:0005886]; ruffle [GO:0001726]	cell leading edge [GO:0031252]; cytoplasm [GO:0005737]; endosome membrane [GO:0010008]; perinuclear region of cytoplasm [GO:0048471]; plasma membrane [GO:0005886]; ruffle [GO:0001726]; GTPase activator activity [GO:0005096]; SH3 domain binding [GO:0017124]; small GTPase binding [GO:0031267]; endosomal transport [GO:0016197]; negative regulation of endocytic recycling [GO:2001136]; small GTPase me…	GTPase activator activity [GO:0005096]; SH3 domain binding [GO:0017124]; small GTPase binding [GO:0031267]	SUBCELLULAR LOCATION: Cytoplasm {ECO:0000250}.	3	4	3	4	5	6
Q9DCQ2	ASPDH_MOUSE	Aspartate dehydrogenase domain-containing protein	Aspdh	0	1.744	0.32239	0	NAD biosynthetic process [GO:0009435]		aspartate dehydrogenase activity [GO:0033735]; NADP binding [GO:0050661]; NAD biosynthetic process [GO:0009435]	aspartate dehydrogenase activity [GO:0033735]; NADP binding [GO:0050661]		7	9	9	9	5	8
Q9JLV1	BAG3_MOUSE	BAG family molecular chaperone regulator 3 (BAG-3) (Bcl-2-associated athanogene 3) (Bcl-2-binding protein Bis)	Bag3	0	0.297996	-0.689431	0	autophagosome assembly [GO:0000045]; cellular response to heat [GO:0034605]; cellular response to mechanical stimulus [GO:0071260]; cellular response to unfolded protein [GO:0034620]; chaperone-mediated autophagy [GO:0061684]; extrinsic apoptotic signaling pathway in absence of ligand [GO:0097192]; extrinsic apoptotic signaling pathway via death domain receptors [GO:0008625]; muscle cell cellular…	cytoplasm [GO:0005737]; cytosol [GO:0005829]; membrane [GO:0016020]; nucleoplasm [GO:0005654]; nucleus [GO:0005634]; protein folding chaperone complex [GO:0101031]; stress fiber [GO:0001725]; Z disc [GO:0030018]	cytoplasm [GO:0005737]; cytosol [GO:0005829]; membrane [GO:0016020]; nucleoplasm [GO:0005654]; nucleus [GO:0005634]; protein folding chaperone complex [GO:0101031]; stress fiber [GO:0001725]; Z disc [GO:0030018]; adenyl-nucleotide exchange factor activity [GO:0000774]; protein-containing complex binding [GO:0044877]; protein-folding chaperone binding [GO:0051087]; autophagosome assembly [GO:00000…	adenyl-nucleotide exchange factor activity [GO:0000774]; protein-containing complex binding [GO:0044877]; protein-folding chaperone binding [GO:0051087]	SUBCELLULAR LOCATION: Nucleus {ECO:0000250|UniProtKB:O95817}. Cytoplasm {ECO:0000250|UniProtKB:O95817}. Note=Colocalizes with HSF1 to the nucleus upon heat stress. {ECO:0000250|UniProtKB:O95817}.	2	2	2	1	1	2
P86547	OSTC2_MOUSE	Osteocalcin-2 (OG2) (Bone Gla protein 2) (BGP2) (Gamma-carboxyglutamic acid-containing protein 2)	Bglap2	0	1.37539	0.429551	0	biomineral tissue development [GO:0031214]; bone development [GO:0060348]; brain development [GO:0007420]; cellular lipid catabolic process [GO:0044242]; cellular response to insulin stimulus [GO:0032869]; cognition [GO:0050890]; dephosphorylation [GO:0016311]; glucose homeostasis [GO:0042593]; learning or memory [GO:0007611]; negative regulation of bone development [GO:1903011]; osteoblast diffe…	cell projection [GO:0042995]; cytoplasm [GO:0005737]; dendrite [GO:0030425]; extracellular region [GO:0005576]; extracellular space [GO:0005615]; perikaryon [GO:0043204]; vesicle [GO:0031982]	cell projection [GO:0042995]; cytoplasm [GO:0005737]; dendrite [GO:0030425]; extracellular region [GO:0005576]; extracellular space [GO:0005615]; perikaryon [GO:0043204]; vesicle [GO:0031982]; calcium ion binding [GO:0005509]; hormone activity [GO:0005179]; hydroxyapatite binding [GO:0046848]; structural constituent of bone [GO:0008147]; biomineral tissue development [GO:0031214]; bone developmen…	calcium ion binding [GO:0005509]; hormone activity [GO:0005179]; hydroxyapatite binding [GO:0046848]; structural constituent of bone [GO:0008147]	SUBCELLULAR LOCATION: Secreted {ECO:0000269|PubMed:17693256, ECO:0000269|PubMed:20655470, ECO:0000269|PubMed:20655471, ECO:0000269|PubMed:21333348, ECO:0000269|PubMed:24074871}.	16	14	12	14	13	13
P58545	BTBD3_MOUSE	BTB/POZ domain-containing protein 3	Btbd3	0	2.61141	1.73628	0	cerebral cortex development [GO:0021987]; dendrite morphogenesis [GO:0048813]; neurogenesis [GO:0022008]	cytosol [GO:0005829]; nucleus [GO:0005634]	cytosol [GO:0005829]; nucleus [GO:0005634]; identical protein binding [GO:0042802]; cerebral cortex development [GO:0021987]; dendrite morphogenesis [GO:0048813]; neurogenesis [GO:0022008]	identical protein binding [GO:0042802]	SUBCELLULAR LOCATION: Cytoplasm, cytosol {ECO:0000269|PubMed:24179155}. Nucleus {ECO:0000269|PubMed:24179155}. Note=Translocates from the cytosol to the nucleus in response to neuronal activity.	10	11	10	11	11	11
P01027	CO3_MOUSE	Complement C3 (HSE-MSF) [Cleaved into: Complement C3 beta chain; C3-beta-c (C3bc); Complement C3 alpha chain; C3a anaphylatoxin; Acylation stimulating protein (ASP) (C3adesArg); Complement C3b alpha' chain; Complement C3c alpha' chain fragment 1; Complement C3dg fragment; Complement C3g fragment; Complement C3d fragment; Complement C3f fragment; Complement C3c alpha' chain fragment 2]	C3	0	0.729329	0.261703	0	amyloid-beta clearance [GO:0097242]; complement activation [GO:0006956]; complement activation, alternative pathway [GO:0006957]; complement activation, classical pathway [GO:0006958]; complement receptor mediated signaling pathway [GO:0002430]; complement-dependent cytotoxicity [GO:0097278]; complement-mediated synapse pruning [GO:0150062]; fatty acid metabolic process [GO:0006631]; inflammatory…	cell surface [GO:0009986]; extracellular region [GO:0005576]; extracellular space [GO:0005615]; protein-containing complex [GO:0032991]	cell surface [GO:0009986]; extracellular region [GO:0005576]; extracellular space [GO:0005615]; protein-containing complex [GO:0032991]; C5L2 anaphylatoxin chemotactic receptor binding [GO:0031715]; endopeptidase inhibitor activity [GO:0004866]; lipid binding [GO:0008289]; amyloid-beta clearance [GO:0097242]; complement activation [GO:0006956]; complement activation, alternative pathway [GO:00069…	C5L2 anaphylatoxin chemotactic receptor binding [GO:0031715]; endopeptidase inhibitor activity [GO:0004866]; lipid binding [GO:0008289]	SUBCELLULAR LOCATION: Secreted.	66	68	66	59	57	52
P47753	CAZA1_MOUSE	F-actin-capping protein subunit alpha-1 (CapZ alpha-1)	Capza1	0	0.0290454	0.042642	0	actin cytoskeleton organization [GO:0030036]; barbed-end actin filament capping [GO:0051016]; cell junction assembly [GO:0034329]	brush border [GO:0005903]; cell-cell junction [GO:0005911]; cortical cytoskeleton [GO:0030863]; cytosol [GO:0005829]; F-actin capping protein complex [GO:0008290]; membrane [GO:0016020]; WASH complex [GO:0071203]	brush border [GO:0005903]; cell-cell junction [GO:0005911]; cortical cytoskeleton [GO:0030863]; cytosol [GO:0005829]; F-actin capping protein complex [GO:0008290]; membrane [GO:0016020]; WASH complex [GO:0071203]; actin binding [GO:0003779]; actin cytoskeleton organization [GO:0030036]; barbed-end actin filament capping [GO:0051016]; cell junction assembly [GO:0034329]	actin binding [GO:0003779]	SUBCELLULAR LOCATION: Cytoplasm, cytoskeleton {ECO:0000250|UniProtKB:A0PFK5}.	5	6	5	4	3	3
P47754	CAZA2_MOUSE	F-actin-capping protein subunit alpha-2 (CapZ alpha-2)	Capza2	0	1.51682	0.627453	0	actin cytoskeleton organization [GO:0030036]; barbed-end actin filament capping [GO:0051016]	brush border [GO:0005903]; cortical cytoskeleton [GO:0030863]; cytosol [GO:0005829]; F-actin capping protein complex [GO:0008290]; membrane [GO:0016020]	brush border [GO:0005903]; cortical cytoskeleton [GO:0030863]; cytosol [GO:0005829]; F-actin capping protein complex [GO:0008290]; membrane [GO:0016020]; actin filament binding [GO:0051015]; actin cytoskeleton organization [GO:0030036]; barbed-end actin filament capping [GO:0051016]	actin filament binding [GO:0051015]		10	9	8	10	10	11
Q9D024	CCD47_MOUSE	PAT complex subunit CCDC47 (Adipocyte-specific protein 4) (Calumin) (Coiled-coil domain-containing protein 47)	Ccdc47	1	1.4148	1.35493	0	calcium ion homeostasis [GO:0055074]; endoplasmic reticulum calcium ion homeostasis [GO:0032469]; endoplasmic reticulum organization [GO:0007029]; ER overload response [GO:0006983]; ERAD pathway [GO:0036503]; multi-pass transmembrane protein insertion into ER membrane [GO:0160063]; post-embryonic development [GO:0009791]; protein insertion into ER membrane [GO:0045048]; ubiquitin-dependent ERAD p…	endoplasmic reticulum [GO:0005783]; endoplasmic reticulum membrane [GO:0005789]; multi-pass translocon complex [GO:0160064]; protein folding chaperone complex [GO:0101031]; rough endoplasmic reticulum [GO:0005791]; rough endoplasmic reticulum membrane [GO:0030867]	endoplasmic reticulum [GO:0005783]; endoplasmic reticulum membrane [GO:0005789]; multi-pass translocon complex [GO:0160064]; protein folding chaperone complex [GO:0101031]; rough endoplasmic reticulum [GO:0005791]; rough endoplasmic reticulum membrane [GO:0030867]; calcium ion binding [GO:0005509]; protein folding chaperone [GO:0044183]; ribosome binding [GO:0043022]; calcium ion homeostasis [GO:…	calcium ion binding [GO:0005509]; protein folding chaperone [GO:0044183]; ribosome binding [GO:0043022]	SUBCELLULAR LOCATION: Endoplasmic reticulum membrane {ECO:0000250|UniProtKB:Q96A33}; Single-pass type I membrane protein {ECO:0000255}. Rough endoplasmic reticulum membrane {ECO:0000269|PubMed:25009997}; Single-pass type I membrane protein {ECO:0000255}.	3	3	3	6	5	2
Q4QRL3	CC88B_MOUSE	Coiled-coil domain-containing protein 88B (Gipie) (Hook-related protein 3) (HkRP3)	Ccdc88b	0	0.625757	0.50203	0	cytoplasmic microtubule organization [GO:0031122]; cytoskeleton-dependent intracellular transport [GO:0030705]; defense response to protozoan [GO:0042832]; positive regulation of cytokine production [GO:0001819]; positive regulation of T cell activation [GO:0050870]; positive regulation of T cell proliferation [GO:0042102]	centrosome [GO:0005813]; cytoplasm [GO:0005737]; cytosol [GO:0005829]; endoplasmic reticulum [GO:0005783]; Golgi apparatus [GO:0005794]; membrane [GO:0016020]; nucleoplasm [GO:0005654]	centrosome [GO:0005813]; cytoplasm [GO:0005737]; cytosol [GO:0005829]; endoplasmic reticulum [GO:0005783]; Golgi apparatus [GO:0005794]; membrane [GO:0016020]; nucleoplasm [GO:0005654]; dynein light intermediate chain binding [GO:0051959]; microtubule binding [GO:0008017]; cytoplasmic microtubule organization [GO:0031122]; cytoskeleton-dependent intracellular transport [GO:0030705]; defense respo…	dynein light intermediate chain binding [GO:0051959]; microtubule binding [GO:0008017]	SUBCELLULAR LOCATION: Membrane {ECO:0000269|PubMed:25403443}; Peripheral membrane protein {ECO:0000305}. Cytoplasm, cytoskeleton, microtubule organizing center {ECO:0000250|UniProtKB:A6NC98}. Endoplasmic reticulum {ECO:0000250|UniProtKB:A6NC98}. Golgi apparatus {ECO:0000250|UniProtKB:A6NC98}. Cytoplasm {ECO:0000250|UniProtKB:A6NC98}.	3	3	3	2	4	2
Q9CRB9	MIC19_MOUSE	MICOS complex subunit Mic19 (Coiled-coil-helix-coiled-coil-helix domain-containing protein 3)	Chchd3	0	0.266873	0.14108	0	cristae formation [GO:0042407]; inner mitochondrial membrane organization [GO:0007007]; mitochondrial fusion [GO:0008053]	MICOS complex [GO:0061617]; mitochondrial inner membrane [GO:0005743]; mitochondrion [GO:0005739]; nucleus [GO:0005634]	MICOS complex [GO:0061617]; mitochondrial inner membrane [GO:0005743]; mitochondrion [GO:0005739]; nucleus [GO:0005634]; molecular adaptor activity [GO:0060090]; phosphatase binding [GO:0019902]; cristae formation [GO:0042407]; inner mitochondrial membrane organization [GO:0007007]; mitochondrial fusion [GO:0008053]	molecular adaptor activity [GO:0060090]; phosphatase binding [GO:0019902]	SUBCELLULAR LOCATION: Mitochondrion inner membrane {ECO:0000269|PubMed:21081504}; Lipid-anchor {ECO:0000269|PubMed:21081504}; Intermembrane side {ECO:0000269|PubMed:21081504}. Cytoplasm {ECO:0000250|UniProtKB:Q9NX63}. Nucleus {ECO:0000250|UniProtKB:Q9NX63}. Mitochondrion {ECO:0000250|UniProtKB:Q9NX63}.	5	4	4	5	4	6
Q8VEA4	MIA40_MOUSE	Mitochondrial intermembrane space import and assembly protein 40 (Coiled-coil-helix-coiled-coil-helix domain-containing protein 4)	Chchd4	0	2.23057	0.555737	0	'de novo' post-translational protein folding [GO:0051084]; cellular response to leukemia inhibitory factor [GO:1990830]; cellular response to oxidative stress [GO:0034599]; establishment of protein localization to mitochondrion [GO:0072655]; mitochondrial DNA repair [GO:0043504]; mitochondrial respiratory chain complex assembly [GO:0033108]; peptidyl-cysteine oxidation [GO:0018171]; positive regu…	mitochondrial intermembrane space [GO:0005758]; mitochondrion [GO:0005739]	mitochondrial intermembrane space [GO:0005758]; mitochondrion [GO:0005739]; protein-disulfide reductase activity [GO:0015035]; 'de novo' post-translational protein folding [GO:0051084]; cellular response to leukemia inhibitory factor [GO:1990830]; cellular response to oxidative stress [GO:0034599]; establishment of protein localization to mitochondrion [GO:0072655]; mitochondrial DNA repair [GO:0…	protein-disulfide reductase activity [GO:0015035]	SUBCELLULAR LOCATION: Mitochondrion intermembrane space {ECO:0000250|UniProtKB:Q8N4Q1}.	4	3	3	2	2	2
P61022	CHP1_MOUSE	Calcineurin B homologous protein 1 (Calcineurin B-like protein) (Calcium-binding protein CHP) (Calcium-binding protein p22) (EF-hand calcium-binding domain-containing protein p22) (Sid 470) (p24)	Chp1	0	0.967931	0.444597	0	cellular response to acidic pH [GO:0071468]; cytoplasmic microtubule organization [GO:0031122]; membrane docking [GO:0022406]; membrane fusion [GO:0061025]; membrane organization [GO:0061024]; microtubule bundle formation [GO:0001578]; negative regulation of calcineurin-NFAT signaling cascade [GO:0070885]; negative regulation of NF-kappaB transcription factor activity [GO:0032088]; negative regul…	cytoplasm [GO:0005737]; endoplasmic reticulum [GO:0005783]; endoplasmic reticulum-Golgi intermediate compartment [GO:0005793]; Golgi membrane [GO:0000139]; membrane raft [GO:0045121]; microtubule cytoskeleton [GO:0015630]; nucleus [GO:0005634]; plasma membrane [GO:0005886]; transport vesicle [GO:0030133]; transporter complex [GO:1990351]	cytoplasm [GO:0005737]; endoplasmic reticulum [GO:0005783]; endoplasmic reticulum-Golgi intermediate compartment [GO:0005793]; Golgi membrane [GO:0000139]; membrane raft [GO:0045121]; microtubule cytoskeleton [GO:0015630]; nucleus [GO:0005634]; plasma membrane [GO:0005886]; transport vesicle [GO:0030133]; transporter complex [GO:1990351]; calcium ion binding [GO:0005509]; calcium-dependent protei…	calcium ion binding [GO:0005509]; calcium-dependent protein binding [GO:0048306]; kinase binding [GO:0019900]; microtubule binding [GO:0008017]; protein kinase inhibitor activity [GO:0004860]; sodium:proton antiporter activity [GO:0015385]	SUBCELLULAR LOCATION: Nucleus {ECO:0000250|UniProtKB:P61023}. Cytoplasm {ECO:0000250|UniProtKB:P61023}. Cytoplasm, cytoskeleton {ECO:0000250|UniProtKB:P61023}. Endomembrane system {ECO:0000250|UniProtKB:P61023}. Endoplasmic reticulum-Golgi intermediate compartment {ECO:0000250|UniProtKB:P61023}. Endoplasmic reticulum {ECO:0000250|UniProtKB:P61023}. Cell membrane {ECO:0000250|UniProtKB:P61023}. Me…	8	8	10	5	9	8
Q99KN2	CIAO1_MOUSE	Probable cytosolic iron-sulfur protein assembly protein CIAO1 (WD repeat-containing protein 39)	Ciao1	0	0.803609	0.850383	0	chromosome segregation [GO:0007059]; iron-sulfur cluster assembly [GO:0016226]; protein maturation by iron-sulfur cluster transfer [GO:0097428]; regulation of transcription by RNA polymerase II [GO:0006357]	CIA complex [GO:0097361]; cytoplasm [GO:0005737]; MMXD complex [GO:0071817]	CIA complex [GO:0097361]; cytoplasm [GO:0005737]; MMXD complex [GO:0071817]; DNA-binding transcription factor activity [GO:0003700]; chromosome segregation [GO:0007059]; iron-sulfur cluster assembly [GO:0016226]; protein maturation by iron-sulfur cluster transfer [GO:0097428]; regulation of transcription by RNA polymerase II [GO:0006357]	DNA-binding transcription factor activity [GO:0003700]	SUBCELLULAR LOCATION: Cytoplasm {ECO:0000250|UniProtKB:O76071}.	2	2	2	3	3	2
Q91WS0	CISD1_MOUSE	CDGSH iron-sulfur domain-containing protein 1 (Cysteine transaminase CISD1) (EC 2.6.1.3) (MitoNEET)	Cisd1	1	0.924216	0.473893	0	protein maturation by [2Fe-2S] cluster transfer [GO:0106034]; regulation of autophagy [GO:0010506]; regulation of cellular respiration [GO:0043457]	cytoplasmic side of mitochondrial outer membrane [GO:0032473]; mitochondrial outer membrane [GO:0005741]; mitochondrion [GO:0005739]	cytoplasmic side of mitochondrial outer membrane [GO:0032473]; mitochondrial outer membrane [GO:0005741]; mitochondrion [GO:0005739]; 2 iron, 2 sulfur cluster binding [GO:0051537]; identical protein binding [GO:0042802]; iron ion binding [GO:0005506]; L-cysteine transaminase activity [GO:0047801]; protein homodimerization activity [GO:0042803]; pyridoxal phosphate binding [GO:0030170]; protein ma…	2 iron, 2 sulfur cluster binding [GO:0051537]; identical protein binding [GO:0042802]; iron ion binding [GO:0005506]; L-cysteine transaminase activity [GO:0047801]; protein homodimerization activity [GO:0042803]; pyridoxal phosphate binding [GO:0030170]	SUBCELLULAR LOCATION: Mitochondrion outer membrane {ECO:0000269|PubMed:17376863}; Single-pass type III membrane protein {ECO:0000269|PubMed:17376863}.	10	10	8	7	8	8
Q9CZ69	CKLF6_MOUSE	CKLF-like MARVEL transmembrane domain-containing protein 6 (Chemokine-like factor superfamily member 6)	Cmtm6	4	2.83156	2.62446	0	endocytic recycling [GO:0032456]; protein transport [GO:0015031]; regulation of protein stability [GO:0031647]	early endosome membrane [GO:0031901]; plasma membrane [GO:0005886]; recycling endosome membrane [GO:0055038]	early endosome membrane [GO:0031901]; plasma membrane [GO:0005886]; recycling endosome membrane [GO:0055038]; endocytic recycling [GO:0032456]; protein transport [GO:0015031]; regulation of protein stability [GO:0031647]		SUBCELLULAR LOCATION: Cell membrane {ECO:0000250|UniProtKB:Q9NX76}; Multi-pass membrane protein {ECO:0000255}. Early endosome membrane {ECO:0000250|UniProtKB:Q9NX76}; Multi-pass membrane protein {ECO:0000255}. Recycling endosome membrane {ECO:0000250|UniProtKB:Q9NX76}. Note=Co-localizes with PD-L1/CD274 in the plasma membrane and in recycling endosomes. {ECO:0000250|UniProtKB:Q9NX76}.	0	1	0	1	2	2
Q5M8N0	CNRP1_MOUSE	CB1 cannabinoid receptor-interacting protein 1 (CRIP-1)	Cnrip1	0	0.214106	-0.186285	0		cytoplasm [GO:0005737]; myelin sheath [GO:0043209]; plasma membrane [GO:0005886]	cytoplasm [GO:0005737]; myelin sheath [GO:0043209]; plasma membrane [GO:0005886]; type 1 cannabinoid receptor binding [GO:0031718]	type 1 cannabinoid receptor binding [GO:0031718]		5	5	6	5	4	5
Q921H9	COA7_MOUSE	Cytochrome c oxidase assembly factor 7 (Beta-lactamase hcp-like protein) (Respiratory chain assembly factor 1) (Sel1 repeat-containing protein 1)	Coa7	0	0.0127435	-0.00870387	0		mitochondrial intermembrane space [GO:0005758]; mitochondrion [GO:0005739]; nucleoplasm [GO:0005654]	mitochondrial intermembrane space [GO:0005758]; mitochondrion [GO:0005739]; nucleoplasm [GO:0005654]		SUBCELLULAR LOCATION: Mitochondrion intermembrane space {ECO:0000250|UniProtKB:Q96BR5}. Note=The import in the mitochondrion intermembrane space is mediated by CHCHD4/MIA40. {ECO:0000250|UniProtKB:Q96BR5}.	3	1	2	1	2	3
Q921L5	COG2_MOUSE	Conserved oligomeric Golgi complex subunit 2 (COG complex subunit 2) (Component of oligomeric Golgi complex 2) (Low density lipoprotein receptor defect C-complementing protein)	Cog2	0	0.0446076	-0.0262725	0	glycosylation [GO:0070085]; Golgi organization [GO:0007030]; intra-Golgi vesicle-mediated transport [GO:0006891]; protein transport [GO:0015031]; retrograde transport, vesicle recycling within Golgi [GO:0000301]	Golgi membrane [GO:0000139]; Golgi stack [GO:0005795]; Golgi transport complex [GO:0017119]	Golgi membrane [GO:0000139]; Golgi stack [GO:0005795]; Golgi transport complex [GO:0017119]; protein-containing complex binding [GO:0044877]; glycosylation [GO:0070085]; Golgi organization [GO:0007030]; intra-Golgi vesicle-mediated transport [GO:0006891]; protein transport [GO:0015031]; retrograde transport, vesicle recycling within Golgi [GO:0000301]	protein-containing complex binding [GO:0044877]	SUBCELLULAR LOCATION: Golgi apparatus membrane {ECO:0000250}; Peripheral membrane protein {ECO:0000250}; Cytoplasmic side {ECO:0000250}.	6	6	6	5	6	5
P61202	CSN2_MOUSE	COP9 signalosome complex subunit 2 (SGN2) (Signalosome subunit 2) (Alien homolog) (JAB1-containing signalosome subunit 2) (Thyroid receptor-interacting protein 15) (TR-interacting protein 15) (TRIP-15)	Cops2	0	0.637195	0.880238	0	inner cell mass cell proliferation [GO:0001833]; negative regulation of DNA-templated transcription [GO:0045892]; negative regulation of transcription by RNA polymerase II [GO:0000122]; neuron differentiation [GO:0030182]; protein deneddylation [GO:0000338]; skeletal muscle cell differentiation [GO:0035914]; trophectodermal cell proliferation [GO:0001834]	COP9 signalosome [GO:0008180]; cytoplasm [GO:0005737]; nucleus [GO:0005634]	COP9 signalosome [GO:0008180]; cytoplasm [GO:0005737]; nucleus [GO:0005634]; transcription corepressor activity [GO:0003714]; inner cell mass cell proliferation [GO:0001833]; negative regulation of DNA-templated transcription [GO:0045892]; negative regulation of transcription by RNA polymerase II [GO:0000122]; neuron differentiation [GO:0030182]; protein deneddylation [GO:0000338]; skeletal muscl…	transcription corepressor activity [GO:0003714]	SUBCELLULAR LOCATION: Cytoplasm {ECO:0000269|PubMed:10087198}. Nucleus {ECO:0000269|PubMed:10087198}.	5	3	5	4	5	4
Q91VU6	DCA11_MOUSE	DDB1- and CUL4-associated factor 11 (WD repeat-containing protein 23)	Dcaf11	0	0.853148	0.435968	0	proteasome-mediated ubiquitin-dependent protein catabolic process [GO:0043161]; protein ubiquitination [GO:0016567]	Cul4-RING E3 ubiquitin ligase complex [GO:0080008]; nucleoplasm [GO:0005654]	Cul4-RING E3 ubiquitin ligase complex [GO:0080008]; nucleoplasm [GO:0005654]; proteasome-mediated ubiquitin-dependent protein catabolic process [GO:0043161]; protein ubiquitination [GO:0016567]			3	1	0	2	2	1
Q8N7N5	DCAF8_MOUSE	DDB1- and CUL4-associated factor 8 (WD repeat-containing protein 42A)	Dcaf8	0	0.0130414	0.0128568	0	protein ubiquitination [GO:0016567]	Cul4-RING E3 ubiquitin ligase complex [GO:0080008]; cytoplasm [GO:0005737]; cytosol [GO:0005829]; mitochondrion [GO:0005739]; nucleoplasm [GO:0005654]; nucleus [GO:0005634]	Cul4-RING E3 ubiquitin ligase complex [GO:0080008]; cytoplasm [GO:0005737]; cytosol [GO:0005829]; mitochondrion [GO:0005739]; nucleoplasm [GO:0005654]; nucleus [GO:0005634]; protein ubiquitination [GO:0016567]		SUBCELLULAR LOCATION: Nucleus {ECO:0000250|UniProtKB:Q5TAQ9}. Cytoplasm {ECO:0000250|UniProtKB:Q5TAQ9}. Note=It shuttles between the nucleus and the cytoplasm. Nuclear import is mediated by KPNA1 and KPNB1 under the regulation of nuclear GTPase RAN. Nuclear export to the cytoplasm is XPO1 dependent. {ECO:0000250|UniProtKB:Q5TAQ9}.	8	6	5	5	5	5
Q9DAR7	DCPS_MOUSE	m7GpppX diphosphatase (EC 3.6.1.59) (DCS-1) (Decapping scavenger enzyme) (Hint-related 7meGMP-directed hydrolase) (Histidine triad nucleotide-binding protein 5) (Histidine triad protein member 5) (HINT-5) (Scavenger mRNA-decapping enzyme DcpS)	Dcps	0	0.71688	0.47256	0	deadenylation-dependent decapping of nuclear-transcribed mRNA [GO:0000290]; methylguanosine-cap decapping [GO:0110156]; mRNA cis splicing, via spliceosome [GO:0045292]	cytoplasm [GO:0005737]; cytosol [GO:0005829]; mitochondrion [GO:0005739]; nucleoplasm [GO:0005654]; nucleus [GO:0005634]; P-body [GO:0000932]	cytoplasm [GO:0005737]; cytosol [GO:0005829]; mitochondrion [GO:0005739]; nucleoplasm [GO:0005654]; nucleus [GO:0005634]; P-body [GO:0000932]; 5'-(N(7)-methyl 5'-triphosphoguanosine)-[mRNA] diphosphatase activity [GO:0140932]; identical protein binding [GO:0042802]; RNA 7-methylguanosine cap binding [GO:0000340]; deadenylation-dependent decapping of nuclear-transcribed mRNA [GO:0000290]; methylgu…	5'-(N(7)-methyl 5'-triphosphoguanosine)-[mRNA] diphosphatase activity [GO:0140932]; identical protein binding [GO:0042802]; RNA 7-methylguanosine cap binding [GO:0000340]	SUBCELLULAR LOCATION: Cytoplasm {ECO:0000250}. Nucleus {ECO:0000250}. Note=Predominantly localized in the nucleus. Nucleocytoplasmic shuttling protein that can transiently enter the cytoplasm in mammalian cells in a XPO1/CRM1-dependent manner. {ECO:0000250}.	1	3	1	3	3	3
Q3U1J4	DDB1_MOUSE	DNA damage-binding protein 1 (DDB p127 subunit) (Damage-specific DNA-binding protein 1) (UV-damaged DNA-binding factor)	Ddb1	0	0.1644	-0.0860939	0	apoptotic process [GO:0006915]; biological process involved in interaction with symbiont [GO:0051702]; cellular response to UV [GO:0034644]; DNA damage response [GO:0006974]; DNA repair [GO:0006281]; ectopic germ cell programmed cell death [GO:0035234]; epigenetic programming in the zygotic pronuclei [GO:0044725]; negative regulation of apoptotic process [GO:0043066]; negative regulation of devel…	Cul4-RING E3 ubiquitin ligase complex [GO:0080008]; Cul4A-RING E3 ubiquitin ligase complex [GO:0031464]; Cul4B-RING E3 ubiquitin ligase complex [GO:0031465]; cytoplasm [GO:0005737]; nucleolus [GO:0005730]; nucleoplasm [GO:0005654]; nucleus [GO:0005634]; protein-containing complex [GO:0032991]; site of double-strand break [GO:0035861]	Cul4-RING E3 ubiquitin ligase complex [GO:0080008]; Cul4A-RING E3 ubiquitin ligase complex [GO:0031464]; Cul4B-RING E3 ubiquitin ligase complex [GO:0031465]; cytoplasm [GO:0005737]; nucleolus [GO:0005730]; nucleoplasm [GO:0005654]; nucleus [GO:0005634]; protein-containing complex [GO:0032991]; site of double-strand break [GO:0035861]; cullin family protein binding [GO:0097602]; damaged DNA bindin…	cullin family protein binding [GO:0097602]; damaged DNA binding [GO:0003684]; protein-containing complex binding [GO:0044877]; protein-macromolecule adaptor activity [GO:0030674]; ubiquitin ligase complex scaffold activity [GO:0160072]; WD40-repeat domain binding [GO:0071987]	SUBCELLULAR LOCATION: Cytoplasm {ECO:0000269|PubMed:24357321}. Nucleus {ECO:0000269|PubMed:24357321}. Note=Primarily cytoplasmic. Translocates to the nucleus following UV irradiation and subsequently accumulates at sites of DNA damage (By similarity). More concentrated in nuclei than in cytoplasm in germinal vesicle (GV) stage oocytes, zygotes and the 2-cell stage, but distributed in the cytoplas…	29	25	25	26	25	21
Q80WW9	DDRGK_MOUSE	DDRGK domain-containing protein 1 (UFM1-binding and PCI domain-containing protein 1)	Ddrgk1	0	0.877674	1.77072	0	cartilage development [GO:0051216]; negative regulation of apoptotic process [GO:0043066]; negative regulation of gene expression [GO:0010629]; negative regulation of IRE1-mediated unfolded protein response [GO:1903895]; negative regulation of proteasomal ubiquitin-dependent protein catabolic process [GO:0032435]; positive regulation of cell migration [GO:0030335]; positive regulation of cell pop…	endoplasmic reticulum [GO:0005783]; endoplasmic reticulum membrane [GO:0005789]; nucleolus [GO:0005730]	endoplasmic reticulum [GO:0005783]; endoplasmic reticulum membrane [GO:0005789]; nucleolus [GO:0005730]; RNA polymerase II-specific DNA-binding transcription factor binding [GO:0061629]; ubiquitin-like protein ligase binding [GO:0044389]; cartilage development [GO:0051216]; negative regulation of apoptotic process [GO:0043066]; negative regulation of gene expression [GO:0010629]; negative regulat…	RNA polymerase II-specific DNA-binding transcription factor binding [GO:0061629]; ubiquitin-like protein ligase binding [GO:0044389]	SUBCELLULAR LOCATION: Endoplasmic reticulum {ECO:0000269|PubMed:21494687}. Endoplasmic reticulum membrane {ECO:0000250|UniProtKB:Q96HY6}. Note=Localizes to the endoplasmic reticulum membrane in response to endoplasmic reticulum stress. {ECO:0000250|UniProtKB:Q96HY6}.	1	3	4	5	4	3
P61460	DEPD5_MOUSE	GATOR1 complex protein DEPDC5 (DEP domain-containing protein 5)	Depdc5	0	1.65561	0.518118	0	cellular response to amino acid starvation [GO:0034198]; intracellular signal transduction [GO:0035556]; negative regulation of TOR signaling [GO:0032007]; negative regulation of TORC1 signaling [GO:1904262]; positive regulation of autophagy [GO:0010508]	Cul3-RING ubiquitin ligase complex [GO:0031463]; cytosol [GO:0005829]; GATOR1 complex [GO:1990130]; lysosomal membrane [GO:0005765]; lysosome [GO:0005764]; perinuclear region of cytoplasm [GO:0048471]	Cul3-RING ubiquitin ligase complex [GO:0031463]; cytosol [GO:0005829]; GATOR1 complex [GO:1990130]; lysosomal membrane [GO:0005765]; lysosome [GO:0005764]; perinuclear region of cytoplasm [GO:0048471]; GTPase activator activity [GO:0005096]; protein-containing complex binding [GO:0044877]; small GTPase binding [GO:0031267]; cellular response to amino acid starvation [GO:0034198]; intracellular si…	GTPase activator activity [GO:0005096]; protein-containing complex binding [GO:0044877]; small GTPase binding [GO:0031267]	SUBCELLULAR LOCATION: Lysosome membrane {ECO:0000250|UniProtKB:O75140}. Cytoplasm, cytosol {ECO:0000269|PubMed:23542697}. Cytoplasm, perinuclear region {ECO:0000269|PubMed:23542697}. Note=Localization to lysosomes is mediated by the KICSTOR complex and is amino acid-independent. {ECO:0000250|UniProtKB:O75140}.	42	44	41	43	41	39
Q99KV1	DJB11_MOUSE	DnaJ homolog subfamily B member 11 (APOBEC1-binding protein 2) (ABBP-2) (ER-associated DNAJ) (ER-associated Hsp40 co-chaperone) (Endoplasmic reticulum DNA J domain-containing protein 3) (ER-resident protein ERdj3) (ERdj3) (ERj3p)	Dnajb11	0	1.26234	0.787875	0	mRNA modification [GO:0016556]; negative regulation of neurogenesis [GO:0050768]; protein folding [GO:0006457]; protein maturation [GO:0051604]	cytoplasm [GO:0005737]; endoplasmic reticulum [GO:0005783]; endoplasmic reticulum chaperone complex [GO:0034663]; endoplasmic reticulum lumen [GO:0005788]; extracellular space [GO:0005615]; nucleus [GO:0005634]; protein folding chaperone complex [GO:0101031]	cytoplasm [GO:0005737]; endoplasmic reticulum [GO:0005783]; endoplasmic reticulum chaperone complex [GO:0034663]; endoplasmic reticulum lumen [GO:0005788]; extracellular space [GO:0005615]; nucleus [GO:0005634]; protein folding chaperone complex [GO:0101031]; misfolded protein binding [GO:0051787]; signaling receptor binding [GO:0005102]; unfolded protein binding [GO:0051082]; mRNA modification […	misfolded protein binding [GO:0051787]; signaling receptor binding [GO:0005102]; unfolded protein binding [GO:0051082]	SUBCELLULAR LOCATION: Endoplasmic reticulum lumen {ECO:0000269|PubMed:15525676}.	6	5	4	7	8	5
Q9QYI6	DNJB9_MOUSE	DnaJ homolog subfamily B member 9 (Endoplasmic reticulum DNA J domain-containing protein 4) (ER-resident protein ERdj4) (ERdj4) (mDj7)	Dnajb9	0	0.637316	1.37425	0	B cell differentiation [GO:0030183]; negative regulation of IRE1-mediated unfolded protein response [GO:1903895]; positive regulation of immunoglobulin production [GO:0002639]; response to endoplasmic reticulum stress [GO:0034976]; response to unfolded protein [GO:0006986]; ubiquitin-dependent ERAD pathway [GO:0030433]	cytoplasm [GO:0005737]; endoplasmic reticulum [GO:0005783]; endoplasmic reticulum lumen [GO:0005788]; nucleolus [GO:0005730]	cytoplasm [GO:0005737]; endoplasmic reticulum [GO:0005783]; endoplasmic reticulum lumen [GO:0005788]; nucleolus [GO:0005730]; Hsp70 protein binding [GO:0030544]; misfolded protein binding [GO:0051787]; protein-folding chaperone binding [GO:0051087]; B cell differentiation [GO:0030183]; negative regulation of IRE1-mediated unfolded protein response [GO:1903895]; positive regulation of immunoglobul…	Hsp70 protein binding [GO:0030544]; misfolded protein binding [GO:0051787]; protein-folding chaperone binding [GO:0051087]	SUBCELLULAR LOCATION: Endoplasmic reticulum lumen {ECO:0000269|PubMed:22267725, ECO:0000305|PubMed:11836248}.	3	1	1	2	3	2
Q9D9V3	ECHD1_MOUSE	Ethylmalonyl-CoA decarboxylase (EC 4.1.1.94) (Enoyl-CoA hydratase domain-containing protein 1) (Methylmalonyl-CoA decarboxylase) (MMCD)	Echdc1	0	1.26155	0.332429	0	fatty acid beta-oxidation [GO:0006635]	cytosol [GO:0005829]	cytosol [GO:0005829]; carboxy-lyase activity [GO:0016831]; methyl/ethyl malonyl-CoA decarboxylase activity [GO:0004492]; fatty acid beta-oxidation [GO:0006635]	carboxy-lyase activity [GO:0016831]; methyl/ethyl malonyl-CoA decarboxylase activity [GO:0004492]	SUBCELLULAR LOCATION: Cytoplasm, cytosol {ECO:0000305|PubMed:22016388}.	9	9	8	8	6	7
Q9WV92	E41L3_MOUSE	Band 4.1-like protein 3 (4.1B) (Differentially expressed in adenocarcinoma of the lung protein 1) (DAL-1) (DAL1P) (mDAL-1) (Erythrocyte membrane protein band 4.1-like 3) [Cleaved into: Band 4.1-like protein 3, N-terminally processed]	Epb41l3	0	0.133234	-0.144391	0	actomyosin structure organization [GO:0031032]; apoptotic process [GO:0006915]; axon development [GO:0061564]; cortical actin cytoskeleton organization [GO:0030866]; cortical cytoskeleton organization [GO:0030865]; myelin maintenance [GO:0043217]; neuron projection morphogenesis [GO:0048812]; paranodal junction assembly [GO:0030913]; paranodal junction maintenance [GO:1990227]; protein localizati…	cell junction [GO:0030054]; cell-cell junction [GO:0005911]; cytoskeleton [GO:0005856]; cytosol [GO:0005829]; juxtaparanode region of axon [GO:0044224]; paranode region of axon [GO:0033270]; plasma membrane [GO:0005886]; postsynaptic density [GO:0014069]	cell junction [GO:0030054]; cell-cell junction [GO:0005911]; cytoskeleton [GO:0005856]; cytosol [GO:0005829]; juxtaparanode region of axon [GO:0044224]; paranode region of axon [GO:0033270]; plasma membrane [GO:0005886]; postsynaptic density [GO:0014069]; actin binding [GO:0003779]; cytoskeletal protein-membrane anchor activity [GO:0106006]; structural constituent of cytoskeleton [GO:0005200]; ac…	actin binding [GO:0003779]; cytoskeletal protein-membrane anchor activity [GO:0106006]; structural constituent of cytoskeleton [GO:0005200]	SUBCELLULAR LOCATION: Cytoplasm, cytoskeleton {ECO:0000250}. Cell membrane {ECO:0000269|PubMed:10652311}; Peripheral membrane protein {ECO:0000269|PubMed:10652311}; Cytoplasmic side {ECO:0000269|PubMed:10652311}. Cytoplasm {ECO:0000250}. Cell junction {ECO:0000269|PubMed:10652311}. Note=Detected in the cytoplasm of actively dividing cells.	5	6	5	5	4	5
Q8BFZ9	ERLN2_MOUSE	Erlin-2 (Endoplasmic reticulum lipid raft-associated protein 2) (Stomatin-prohibitin-flotillin-HflC/K domain-containing protein 2) (SPFH domain-containing protein 2)	Erlin2	0	1.62569	1.32753	0	cholesterol metabolic process [GO:0008203]; negative regulation of cholesterol biosynthetic process [GO:0045541]; negative regulation of fatty acid biosynthetic process [GO:0045717]; regulation of cholesterol biosynthetic process [GO:0045540]; SREBP signaling pathway [GO:0032933]; ubiquitin-dependent ERAD pathway [GO:0030433]	cytosol [GO:0005829]; endoplasmic reticulum [GO:0005783]; endoplasmic reticulum membrane [GO:0005789]; membrane raft [GO:0045121]; plasma membrane [GO:0005886]; protein-containing complex [GO:0032991]	cytosol [GO:0005829]; endoplasmic reticulum [GO:0005783]; endoplasmic reticulum membrane [GO:0005789]; membrane raft [GO:0045121]; plasma membrane [GO:0005886]; protein-containing complex [GO:0032991]; cholesterol binding [GO:0015485]; ubiquitin protein ligase binding [GO:0031625]; cholesterol metabolic process [GO:0008203]; negative regulation of cholesterol biosynthetic process [GO:0045541]; ne…	cholesterol binding [GO:0015485]; ubiquitin protein ligase binding [GO:0031625]	SUBCELLULAR LOCATION: Endoplasmic reticulum membrane {ECO:0000250}; Single-pass type II membrane protein {ECO:0000250}. Note=Associated with lipid raft-like domains of the endoplasmic reticulum membrane. {ECO:0000250}.	1	1	1	1	2	1
Q9D1Q6	ERP44_MOUSE	Endoplasmic reticulum resident protein 44 (ER protein 44) (ERp44) (Thioredoxin domain-containing protein 4)	Erp44	0	0.574072	0.531462	0	glycoprotein metabolic process [GO:0009100]; protein folding [GO:0006457]; response to endoplasmic reticulum stress [GO:0034976]; response to unfolded protein [GO:0006986]	cell surface [GO:0009986]; endoplasmic reticulum lumen [GO:0005788]; endoplasmic reticulum membrane [GO:0005789]; endoplasmic reticulum-Golgi intermediate compartment [GO:0005793]	cell surface [GO:0009986]; endoplasmic reticulum lumen [GO:0005788]; endoplasmic reticulum membrane [GO:0005789]; endoplasmic reticulum-Golgi intermediate compartment [GO:0005793]; protein disulfide isomerase activity [GO:0003756]; glycoprotein metabolic process [GO:0009100]; protein folding [GO:0006457]; response to endoplasmic reticulum stress [GO:0034976]; response to unfolded protein [GO:0006…	protein disulfide isomerase activity [GO:0003756]	SUBCELLULAR LOCATION: Endoplasmic reticulum lumen {ECO:0000255|PROSITE-ProRule:PRU10138, ECO:0000269|PubMed:15652484}.	15	13	15	12	12	14
A2AJL3	FGGY_MOUSE	FGGY carbohydrate kinase domain-containing protein (D-ribulokinase FGGY) (EC 2.7.1.47)	Fggy	0	0.596198	0.236665	0	carbohydrate phosphorylation [GO:0046835]; neuron cellular homeostasis [GO:0070050]; pentose metabolic process [GO:0019321]	cytoplasm [GO:0005737]	cytoplasm [GO:0005737]; D-ribulokinase activity [GO:0019150]; carbohydrate phosphorylation [GO:0046835]; neuron cellular homeostasis [GO:0070050]; pentose metabolic process [GO:0019321]	D-ribulokinase activity [GO:0019150]		15	15	16	15	16	13
Q6P9Q6	FKB15_MOUSE	FK506-binding protein 15 (FKBP-15) (133 kDa FK506-binding protein) (133 kDa FKBP) (FKBP-133) (WASP and FKBP-like) (WAFL)	Fkbp15	0	0.62405	0.391865	0	endocytosis [GO:0006897]	actin cytoskeleton [GO:0015629]; axon [GO:0030424]; early endosome [GO:0005769]; endosome [GO:0005768]; growth cone [GO:0030426]; membrane [GO:0016020]	actin cytoskeleton [GO:0015629]; axon [GO:0030424]; early endosome [GO:0005769]; endosome [GO:0005768]; growth cone [GO:0030426]; membrane [GO:0016020]; actin binding [GO:0003779]; endocytosis [GO:0006897]	actin binding [GO:0003779]	SUBCELLULAR LOCATION: Cytoplasm {ECO:0000269|PubMed:16756961}. Cell projection, axon {ECO:0000269|PubMed:16756961}. Early endosome {ECO:0000269|PubMed:16756961}. Note=Present in axons and neuronal growth cones. {ECO:0000269|PubMed:16756961}.	1	1	3	1	2	3
O35465	FKBP8_MOUSE	Peptidyl-prolyl cis-trans isomerase FKBP8 (PPIase FKBP8) (EC 5.2.1.8) (38 kDa FK506-binding protein) (38 kDa FKBP) (FKBP-38) (mFKBP38) (FK506-binding protein 8) (FKBP-8) (FKBPR38) (Rotamase)	Fkbp8	1	0.453743	1.2414	0	apoptotic process [GO:0006915]; BMP signaling pathway [GO:0030509]; camera-type eye development [GO:0043010]; cell fate specification [GO:0001708]; dorsal/ventral neural tube patterning [GO:0021904]; dorsal/ventral pattern formation [GO:0009953]; multicellular organism growth [GO:0035264]; negative regulation of apoptotic process [GO:0043066]; negative regulation of protein phosphorylation [GO:00…	cytosol [GO:0005829]; endomembrane system [GO:0012505]; endoplasmic reticulum [GO:0005783]; endoplasmic reticulum membrane [GO:0005789]; membrane [GO:0016020]; mitochondrial envelope [GO:0005740]; mitochondrial membrane [GO:0031966]; mitochondrion [GO:0005739]; protein-containing complex [GO:0032991]	cytosol [GO:0005829]; endomembrane system [GO:0012505]; endoplasmic reticulum [GO:0005783]; endoplasmic reticulum membrane [GO:0005789]; membrane [GO:0016020]; mitochondrial envelope [GO:0005740]; mitochondrial membrane [GO:0031966]; mitochondrion [GO:0005739]; protein-containing complex [GO:0032991]; calmodulin binding [GO:0005516]; disordered domain specific binding [GO:0097718]; identical prot…	calmodulin binding [GO:0005516]; disordered domain specific binding [GO:0097718]; identical protein binding [GO:0042802]; peptidyl-prolyl cis-trans isomerase activity [GO:0003755]; protein folding chaperone [GO:0044183]	SUBCELLULAR LOCATION: Mitochondrion membrane {ECO:0000269|PubMed:15105374}; Single-pass membrane protein {ECO:0000269|PubMed:15105374}; Cytoplasmic side {ECO:0000269|PubMed:15105374}.	1	0	1	2	4	2
P97379	G3BP2_MOUSE	Ras GTPase-activating protein-binding protein 2 (G3BP-2) (GAP SH3 domain-binding protein 2)	G3bp2	0	1.62087	0.316508	0	innate immune response [GO:0045087]; mRNA transport [GO:0051028]; positive regulation of stress granule assembly [GO:0062029]; protein homooligomerization [GO:0051260]; small GTPase mediated signal transduction [GO:0007264]; stress granule assembly [GO:0034063]	cytoplasmic stress granule [GO:0010494]; cytosol [GO:0005829]; ribonucleoprotein complex [GO:1990904]	cytoplasmic stress granule [GO:0010494]; cytosol [GO:0005829]; ribonucleoprotein complex [GO:1990904]; molecular condensate scaffold activity [GO:0140693]; mRNA binding [GO:0003729]; innate immune response [GO:0045087]; mRNA transport [GO:0051028]; positive regulation of stress granule assembly [GO:0062029]; protein homooligomerization [GO:0051260]; small GTPase mediated signal transduction [GO:0…	molecular condensate scaffold activity [GO:0140693]; mRNA binding [GO:0003729]	SUBCELLULAR LOCATION: Cytoplasm {ECO:0000250|UniProtKB:Q9UN86}. Cytoplasm, Stress granule {ECO:0000250|UniProtKB:Q9UN86}.	1	2	2	2	1	2
P21614	VTDB_MOUSE	Vitamin D-binding protein (DBP) (VDB) (Gc-globulin) (Group-specific component)	Gc	0	1.18607	0.356023	0	vitamin D metabolic process [GO:0042359]	axon [GO:0030424]; cytoplasm [GO:0005737]; extracellular space [GO:0005615]; perinuclear region of cytoplasm [GO:0048471]	axon [GO:0030424]; cytoplasm [GO:0005737]; extracellular space [GO:0005615]; perinuclear region of cytoplasm [GO:0048471]; actin binding [GO:0003779]; calcidiol binding [GO:1902118]; vitamin D binding [GO:0005499]; vitamin transmembrane transporter activity [GO:0090482]; vitamin D metabolic process [GO:0042359]	actin binding [GO:0003779]; calcidiol binding [GO:1902118]; vitamin D binding [GO:0005499]; vitamin transmembrane transporter activity [GO:0090482]	SUBCELLULAR LOCATION: Secreted {ECO:0000269|PubMed:10052453}.	36	35	35	34	34	32
Q8CHG3	GCC2_MOUSE	GRIP and coiled-coil domain-containing protein 2 (185 kDa Golgi coiled-coil protein) (GCC185)	Gcc2	0	1.4377	0.788431	0	Golgi ribbon formation [GO:0090161]; late endosome to Golgi transport [GO:0034499]; microtubule anchoring [GO:0034453]; microtubule organizing center organization [GO:0031023]; protein localization to Golgi apparatus [GO:0034067]; protein targeting to lysosome [GO:0006622]; protein transport [GO:0015031]; recycling endosome to Golgi transport [GO:0071955]; regulation of protein exit from endoplas…	cytosol [GO:0005829]; Golgi apparatus [GO:0005794]; membrane [GO:0016020]; nucleoplasm [GO:0005654]; trans-Golgi network [GO:0005802]	cytosol [GO:0005829]; Golgi apparatus [GO:0005794]; membrane [GO:0016020]; nucleoplasm [GO:0005654]; trans-Golgi network [GO:0005802]; identical protein binding [GO:0042802]; Golgi ribbon formation [GO:0090161]; late endosome to Golgi transport [GO:0034499]; microtubule anchoring [GO:0034453]; microtubule organizing center organization [GO:0031023]; protein localization to Golgi apparatus [GO:003…	identical protein binding [GO:0042802]	SUBCELLULAR LOCATION: Cytoplasm {ECO:0000250}. Golgi apparatus, trans-Golgi network membrane {ECO:0000250}; Peripheral membrane protein {ECO:0000250}.	7	6	4	8	7	8
Q8BZM1	GLMN_MOUSE	Glomulin (FK506-binding protein-associated protein) (FAP) (FKBP-associated protein)	Glmn	0	0.600799	0.189453	0	cell surface receptor signaling pathway [GO:0007166]; circulatory system development [GO:0072359]; epigenetic regulation of gene expression [GO:0040029]; muscle cell differentiation [GO:0042692]; negative regulation of cell population proliferation [GO:0008285]; negative regulation of T cell proliferation [GO:0042130]; neural tube closure [GO:0001843]; positive regulation of cytokine production […	Cul2-RING ubiquitin ligase complex [GO:0031462]; Cul3-RING ubiquitin ligase complex [GO:0031463]; Cul4A-RING E3 ubiquitin ligase complex [GO:0031464]; cullin-RING ubiquitin ligase complex [GO:0031461]; cytoplasm [GO:0005737]	Cul2-RING ubiquitin ligase complex [GO:0031462]; Cul3-RING ubiquitin ligase complex [GO:0031463]; Cul4A-RING E3 ubiquitin ligase complex [GO:0031464]; cullin-RING ubiquitin ligase complex [GO:0031461]; cytoplasm [GO:0005737]; hepatocyte growth factor receptor binding [GO:0005171]; signaling receptor binding [GO:0005102]; ubiquitin protein ligase binding [GO:0031625]; ubiquitin-protein transferase…	hepatocyte growth factor receptor binding [GO:0005171]; signaling receptor binding [GO:0005102]; ubiquitin protein ligase binding [GO:0031625]; ubiquitin-protein transferase inhibitor activity [GO:0055105]		2	3	3	3	3	3
Q9CPV4	GLOD4_MOUSE	Glyoxalase domain-containing protein 4	Glod4	0	1.4446	0.494027	0		mitochondrion [GO:0005739]	mitochondrion [GO:0005739]		SUBCELLULAR LOCATION: Mitochondrion {ECO:0000250}.	2	2	2	3	3	2
Q8K0R6	GLTD2_MOUSE	Glycolipid transfer protein domain-containing protein 2	Gltpd2	1	0.626695	0.345611	0	ceramide transport [GO:0035627]; intermembrane lipid transfer [GO:0120009]	cytosol [GO:0005829]	cytosol [GO:0005829]; ceramide 1-phosphate binding [GO:1902387]; ceramide 1-phosphate transfer activity [GO:1902388]; ceramide transport [GO:0035627]; intermembrane lipid transfer [GO:0120009]	ceramide 1-phosphate binding [GO:1902387]; ceramide 1-phosphate transfer activity [GO:1902388]		1	1	1	2	3	2
P62874	GBB1_MOUSE	Guanine nucleotide-binding protein G(I)/G(S)/G(T) subunit beta-1 (Transducin beta chain 1)	Gnb1	0	0.507086	-0.253217	0	cardiac muscle cell apoptotic process [GO:0010659]; cell population proliferation [GO:0008283]; cellular response to hypoxia [GO:0071456]; G protein-coupled receptor signaling pathway [GO:0007186]; phospholipase C-activating G protein-coupled receptor signaling pathway [GO:0007200]; phototransduction, visible light [GO:0007603]; positive regulation of cytosolic calcium ion concentration [GO:00072…	cell body [GO:0044297]; cytoplasm [GO:0005737]; dendrite [GO:0030425]; heterotrimeric G-protein complex [GO:0005834]; myelin sheath [GO:0043209]; photoreceptor inner segment [GO:0001917]; photoreceptor outer segment [GO:0001750]; photoreceptor outer segment membrane [GO:0042622]; plasma membrane [GO:0005886]	cell body [GO:0044297]; cytoplasm [GO:0005737]; dendrite [GO:0030425]; heterotrimeric G-protein complex [GO:0005834]; myelin sheath [GO:0043209]; photoreceptor inner segment [GO:0001917]; photoreceptor outer segment [GO:0001750]; photoreceptor outer segment membrane [GO:0042622]; plasma membrane [GO:0005886]; alkylglycerophosphoethanolamine phosphodiesterase activity [GO:0047391]; GTPase activity…	alkylglycerophosphoethanolamine phosphodiesterase activity [GO:0047391]; GTPase activity [GO:0003924]; GTPase binding [GO:0051020]; protein-containing complex binding [GO:0044877]; signaling receptor complex adaptor activity [GO:0030159]; spectrin binding [GO:0030507]		9	9	6	4	5	4
P62880	GBB2_MOUSE	Guanine nucleotide-binding protein G(I)/G(S)/G(T) subunit beta-2 (G protein subunit beta-2) (Transducin beta chain 2)	Gnb2	0	1.18446	0.73936	0	G protein-coupled receptor signaling pathway [GO:0007186]; regulation of potassium ion transmembrane transport [GO:1901379]	cell body [GO:0044297]; cytoplasm [GO:0005737]; heterotrimeric G-protein complex [GO:0005834]; myelin sheath [GO:0043209]; perinuclear region of cytoplasm [GO:0048471]; plasma membrane [GO:0005886]; protein-containing complex [GO:0032991]	cell body [GO:0044297]; cytoplasm [GO:0005737]; heterotrimeric G-protein complex [GO:0005834]; myelin sheath [GO:0043209]; perinuclear region of cytoplasm [GO:0048471]; plasma membrane [GO:0005886]; protein-containing complex [GO:0032991]; calcium channel regulator activity [GO:0005246]; GTPase activity [GO:0003924]; GTPase binding [GO:0051020]; protein-containing complex binding [GO:0044877]; si…	calcium channel regulator activity [GO:0005246]; GTPase activity [GO:0003924]; GTPase binding [GO:0051020]; protein-containing complex binding [GO:0044877]; signaling receptor complex adaptor activity [GO:0030159]	SUBCELLULAR LOCATION: Cytoplasm, perinuclear region {ECO:0000250|UniProtKB:P62879}. Cell membrane {ECO:0000250|UniProtKB:P62879}.	5	6	4	5	4	4
Q9DAS9	GBG12_MOUSE	Guanine nucleotide-binding protein G(I)/G(S)/G(O) subunit gamma-12	Gng12	0	0.353776	-0.419634	0	G protein-coupled receptor signaling pathway [GO:0007186]	heterotrimeric G-protein complex [GO:0005834]	heterotrimeric G-protein complex [GO:0005834]; G-protein beta-subunit binding [GO:0031681]; PDZ domain binding [GO:0030165]; phosphate ion binding [GO:0042301]; G protein-coupled receptor signaling pathway [GO:0007186]	G-protein beta-subunit binding [GO:0031681]; PDZ domain binding [GO:0030165]; phosphate ion binding [GO:0042301]	SUBCELLULAR LOCATION: Cell membrane {ECO:0000305}; Lipid-anchor {ECO:0000305}; Cytoplasmic side {ECO:0000305}.	2	1	4	4	2	2
Q80SZ7	GBG5_MOUSE	Guanine nucleotide-binding protein G(I)/G(S)/G(O) subunit gamma-5	Gng5	0	0.0406	-0.112637	0	G protein-coupled receptor signaling pathway [GO:0007186]; positive regulation of neural precursor cell proliferation [GO:2000179]; positive regulation of secondary heart field cardioblast proliferation [GO:0072513]	G-protein beta/gamma-subunit complex [GO:0031680]; heterotrimeric G-protein complex [GO:0005834]; mitochondrion [GO:0005739]	G-protein beta/gamma-subunit complex [GO:0031680]; heterotrimeric G-protein complex [GO:0005834]; mitochondrion [GO:0005739]; G-protein beta-subunit binding [GO:0031681]; PDZ domain binding [GO:0030165]; G protein-coupled receptor signaling pathway [GO:0007186]; positive regulation of neural precursor cell proliferation [GO:2000179]; positive regulation of secondary heart field cardioblast prolif…	G-protein beta-subunit binding [GO:0031681]; PDZ domain binding [GO:0030165]	SUBCELLULAR LOCATION: Cell membrane {ECO:0000305}; Lipid-anchor {ECO:0000305}; Cytoplasmic side {ECO:0000305}.	0	1	1	1	2	2
A2ATI9	A2ATI9_MOUSE	Golgi reassembly stacking protein 2	Gorasp2	0	0.115154	-0.0545197	0		Golgi apparatus [GO:0005794]	Golgi apparatus [GO:0005794]			3	2	1	1	1	1
Q3MIA8	Q3MIA8_MOUSE	G protein pathway suppressor 1	Gps1	0	1.11919	0.373111	0		cytoplasm [GO:0005737]; nucleus [GO:0005634]	cytoplasm [GO:0005737]; nucleus [GO:0005634]		SUBCELLULAR LOCATION: Cytoplasm {ECO:0000256|ARBA:ARBA00004496}. Nucleus {ECO:0000256|ARBA:ARBA00004123}.	1	2	2	4	4	3
Q8K2C9	HACD3_MOUSE	Very-long-chain (3R)-3-hydroxyacyl-CoA dehydratase 3 (EC 4.2.1.134) (3-hydroxyacyl-CoA dehydratase 3) (HACD3) (Butyrate-induced protein 1) (B-ind1) (Protein-tyrosine phosphatase-like A domain-containing protein 1)	Hacd3	6	1.48171	1.24401	0	fatty acid elongation [GO:0030497]; JNK cascade [GO:0007254]; negative regulation of intracellular signal transduction [GO:1902532]; positive regulation by virus of viral protein levels in host cell [GO:0046726]; positive regulation of viral genome replication [GO:0045070]; Rho protein signal transduction [GO:0007266]; sphingolipid biosynthetic process [GO:0030148]; very long-chain fatty acid bio…	endoplasmic reticulum [GO:0005783]; endoplasmic reticulum membrane [GO:0005789]; nuclear membrane [GO:0031965]	endoplasmic reticulum [GO:0005783]; endoplasmic reticulum membrane [GO:0005789]; nuclear membrane [GO:0031965]; 3-hydroxyacyl-CoA dehydratase activity [GO:0018812]; enzyme binding [GO:0019899]; very-long-chain (3R)-3-hydroxyacyl-CoA dehydratase activity [GO:0102158]; fatty acid elongation [GO:0030497]; JNK cascade [GO:0007254]; negative regulation of intracellular signal transduction [GO:1902532]…	3-hydroxyacyl-CoA dehydratase activity [GO:0018812]; enzyme binding [GO:0019899]; very-long-chain (3R)-3-hydroxyacyl-CoA dehydratase activity [GO:0102158]	SUBCELLULAR LOCATION: Endoplasmic reticulum membrane {ECO:0000250|UniProtKB:Q9P035}; Multi-pass membrane protein {ECO:0000250|UniProtKB:Q9P035}.	0	0	0	2	2	1
Q8BKT8	HAUS7_MOUSE	HAUS augmin-like complex subunit 7 (26S proteasome-associated UCH37-interacting protein 1) (UCHL5-interacting protein)	Haus7	0	1.44049	0.663009	0	cell division [GO:0051301]; centrosome cycle [GO:0007098]; spindle assembly [GO:0051225]	centrosome [GO:0005813]; cytoplasm [GO:0005737]; HAUS complex [GO:0070652]; mitotic spindle microtubule [GO:1990498]; nucleolus [GO:0005730]; plasma membrane [GO:0005886]	centrosome [GO:0005813]; cytoplasm [GO:0005737]; HAUS complex [GO:0070652]; mitotic spindle microtubule [GO:1990498]; nucleolus [GO:0005730]; plasma membrane [GO:0005886]; microtubule minus-end binding [GO:0051011]; thioesterase binding [GO:0031996]; cell division [GO:0051301]; centrosome cycle [GO:0007098]; spindle assembly [GO:0051225]	microtubule minus-end binding [GO:0051011]; thioesterase binding [GO:0031996]	SUBCELLULAR LOCATION: Cytoplasm, cytoskeleton, microtubule organizing center, centrosome {ECO:0000250|UniProtKB:Q99871}. Cytoplasm, cytoskeleton, spindle {ECO:0000250|UniProtKB:Q99871}. Note=Localizes to interphase centrosomes and to mitotic spindle microtubules. {ECO:0000250|UniProtKB:Q99871}.	3	3	2	2	2	1
Q9CYW4	HDHD3_MOUSE	Haloacid dehalogenase-like hydrolase domain-containing protein 3	Hdhd3	0	1.14335	1.25287	0		intracellular membrane-bounded organelle [GO:0043231]; mitochondrion [GO:0005739]; nucleolus [GO:0005730]; nucleus [GO:0005634]	intracellular membrane-bounded organelle [GO:0043231]; mitochondrion [GO:0005739]; nucleolus [GO:0005730]; nucleus [GO:0005634]			0	0	0	2	1	1
A0A087WP83	A0A087WP83_MOUSE	High density lipoprotein (HDL) binding protein	Hdlbp	0	2.07355	0.930645	0		cytoplasm [GO:0005737]	cytoplasm [GO:0005737]; RNA binding [GO:0003723]	RNA binding [GO:0003723]		5	6	7	9	10	9
Q5QNV8	HEAT9_MOUSE	Protein HEATR9 (HEAT repeat-containing protein 9)	Heatr9	0	0.894698	0.282989	0	hematopoietic progenitor cell differentiation [GO:0002244]		hematopoietic progenitor cell differentiation [GO:0002244]			3	3	3	3	3	3
A0A140T8J4	A0A140T8J4_MOUSE	Heme-binding protein 1	Hebp1	0	0.956417	0.284663	0		cytoplasm [GO:0005737]	cytoplasm [GO:0005737]		SUBCELLULAR LOCATION: Cytoplasm {ECO:0000256|ARBA:ARBA00004496}.	9	9	9	8	8	8
Q9CR41	HYPK_MOUSE	Huntingtin-interacting protein K (Huntingtin yeast partner K)	Hypk	0	0.319459	0.253161	0	negative regulation of apoptotic process [GO:0043066]; protein stabilization [GO:0050821]	cytoplasm [GO:0005737]; microtubule cytoskeleton [GO:0015630]; nucleoplasm [GO:0005654]; nucleus [GO:0005634]; protein-containing complex [GO:0032991]	cytoplasm [GO:0005737]; microtubule cytoskeleton [GO:0015630]; nucleoplasm [GO:0005654]; nucleus [GO:0005634]; protein-containing complex [GO:0032991]; protein folding chaperone [GO:0044183]; negative regulation of apoptotic process [GO:0043066]; protein stabilization [GO:0050821]	protein folding chaperone [GO:0044183]	SUBCELLULAR LOCATION: Nucleus {ECO:0000250|UniProtKB:Q9NX55}. Cytoplasm {ECO:0000250|UniProtKB:Q9NX55}. Note=Within the NatA/HYPK complex, may localize to ribosomes. {ECO:0000250|UniProtKB:Q9NX55}.	3	1	3	1	2	1
P16382	IL4RA_MOUSE	Interleukin-4 receptor subunit alpha (IL-4 receptor subunit alpha) (IL-4R subunit alpha) (IL-4R-alpha) (IL-4RA) (CD antigen CD124) [Cleaved into: Soluble interleukin-4 receptor subunit alpha (Soluble IL-4 receptor subunit alpha) (Soluble IL-4R-alpha) (sIL4Ralpha/prot) (IL-4-binding protein) (IL4-BP)]	Il4r	1	0.246122	0.111849	0	cytokine-mediated signaling pathway [GO:0019221]; defense response to protozoan [GO:0042832]; immunoglobulin mediated immune response [GO:0016064]; interleukin-4-mediated signaling pathway [GO:0035771]; negative regulation of T-helper 1 cell differentiation [GO:0045626]; positive regulation of chemokine production [GO:0032722]; positive regulation of cold-induced thermogenesis [GO:0120162]; posit…	centriolar satellite [GO:0034451]; external side of plasma membrane [GO:0009897]; extracellular space [GO:0005615]; nucleoplasm [GO:0005654]; plasma membrane [GO:0005886]; receptor complex [GO:0043235]	centriolar satellite [GO:0034451]; external side of plasma membrane [GO:0009897]; extracellular space [GO:0005615]; nucleoplasm [GO:0005654]; plasma membrane [GO:0005886]; receptor complex [GO:0043235]; cytokine receptor activity [GO:0004896]; interleukin-4 receptor activity [GO:0004913]; cytokine-mediated signaling pathway [GO:0019221]; defense response to protozoan [GO:0042832]; immunoglobulin …	cytokine receptor activity [GO:0004896]; interleukin-4 receptor activity [GO:0004913]	SUBCELLULAR LOCATION: Cell membrane; Single-pass type I membrane protein.; SUBCELLULAR LOCATION: [Isoform 2]: Secreted.	13	15	16	14	15	16
Q91V64	ISOC1_MOUSE	Isochorismatase domain-containing protein 1	Isoc1	0	1.93226	0.923668	0		cytoplasm [GO:0005737]; peroxisome [GO:0005777]	cytoplasm [GO:0005737]; peroxisome [GO:0005777]			7	7	8	7	6	5
P85094	ISC2A_MOUSE	Isochorismatase domain-containing protein 2A	Isoc2a	0	1.03962	0.337145	0	protein destabilization [GO:0031648]	cytoplasm [GO:0005737]; mitochondrion [GO:0005739]; nucleus [GO:0005634]	cytoplasm [GO:0005737]; mitochondrion [GO:0005739]; nucleus [GO:0005634]; protein destabilization [GO:0031648]		SUBCELLULAR LOCATION: Cytoplasm {ECO:0000250}. Nucleus {ECO:0000250}. Note=Localizes to the nucleus in the presence of CDKN2A. {ECO:0000250}.	4	4	4	4	4	4
Q99KW9	TIP_MOUSE	T-cell immunomodulatory protein (Protein TIP) (Integrin-alpha FG-GAP repeat-containing protein 1) (Linkin)	Itfg1	1	1.66809	0.459993	0		extracellular region [GO:0005576]; plasma membrane [GO:0005886]	extracellular region [GO:0005576]; plasma membrane [GO:0005886]		SUBCELLULAR LOCATION: Secreted {ECO:0000305}. Membrane {ECO:0000305}; Single-pass type I membrane protein {ECO:0000305}.	5	6	6	4	6	4
Q9JHS3	LTOR2_MOUSE	Ragulator complex protein LAMTOR2 (Endosomal adaptor protein p14) (Late endosomal/lysosomal Mp1-interacting protein) (Late endosomal/lysosomal adaptor and MAPK and MTOR activator 2) (Mitogen-activated protein-binding protein-interacting protein) (Roadblock domain-containing protein 3)	Lamtor2	0	0.081618	0.0870597	0	cellular response to amino acid stimulus [GO:0071230]; fibroblast migration [GO:0010761]; positive regulation of MAPK cascade [GO:0043410]; positive regulation of TOR signaling [GO:0032008]; positive regulation of TORC1 signaling [GO:1904263]; protein localization [GO:0008104]; protein localization to cell junction [GO:1902414]; regulation of cell growth [GO:0001558]; regulation of cell-substrate…	FNIP-folliculin RagC/D GAP [GO:1990877]; late endosome [GO:0005770]; late endosome membrane [GO:0031902]; lysosomal membrane [GO:0005765]; Ragulator complex [GO:0071986]	FNIP-folliculin RagC/D GAP [GO:1990877]; late endosome [GO:0005770]; late endosome membrane [GO:0031902]; lysosomal membrane [GO:0005765]; Ragulator complex [GO:0071986]; guanyl-nucleotide exchange factor activity [GO:0005085]; molecular adaptor activity [GO:0060090]; cellular response to amino acid stimulus [GO:0071230]; fibroblast migration [GO:0010761]; positive regulation of MAPK cascade [GO:…	guanyl-nucleotide exchange factor activity [GO:0005085]; molecular adaptor activity [GO:0060090]	SUBCELLULAR LOCATION: Late endosome membrane {ECO:0000269|PubMed:11266467, ECO:0000269|PubMed:15263099, ECO:0000269|PubMed:19177150}; Peripheral membrane protein {ECO:0000269|PubMed:19177150}; Cytoplasmic side {ECO:0000269|PubMed:19177150}. Lysosome membrane {ECO:0000269|PubMed:11266467}; Peripheral membrane protein {ECO:0000269|PubMed:19177150}; Cytoplasmic side {ECO:0000269|PubMed:19177150}. No…	4	3	1	3	2	2
O88653	LTOR3_MOUSE	Ragulator complex protein LAMTOR3 (Late endosomal/lysosomal adaptor and MAPK and MTOR activator 3) (MEK-binding partner 1) (Mp1) (Mitogen-activated protein kinase kinase 1-interacting protein 1) (Mitogen-activated protein kinase scaffold protein 1)	Lamtor3	0	1.16418	0.668599	0	cellular response to amino acid stimulus [GO:0071230]; positive regulation of MAPK cascade [GO:0043410]; positive regulation of TOR signaling [GO:0032008]; positive regulation of TORC1 signaling [GO:1904263]; protein localization [GO:0008104]; protein localization to cell junction [GO:1902414]; TORC1 signaling [GO:0038202]	FNIP-folliculin RagC/D GAP [GO:1990877]; late endosome [GO:0005770]; late endosome membrane [GO:0031902]; lysosomal membrane [GO:0005765]; Ragulator complex [GO:0071986]	FNIP-folliculin RagC/D GAP [GO:1990877]; late endosome [GO:0005770]; late endosome membrane [GO:0031902]; lysosomal membrane [GO:0005765]; Ragulator complex [GO:0071986]; guanyl-nucleotide exchange factor activity [GO:0005085]; kinase activator activity [GO:0019209]; molecular adaptor activity [GO:0060090]; cellular response to amino acid stimulus [GO:0071230]; positive regulation of MAPK cascade…	guanyl-nucleotide exchange factor activity [GO:0005085]; kinase activator activity [GO:0019209]; molecular adaptor activity [GO:0060090]	SUBCELLULAR LOCATION: Late endosome membrane {ECO:0000269|PubMed:15263099, ECO:0000269|PubMed:19177150}; Peripheral membrane protein {ECO:0000269|PubMed:15263099, ECO:0000269|PubMed:19177150}; Cytoplasmic side {ECO:0000269|PubMed:15263099, ECO:0000269|PubMed:19177150}. Note=Recruited to lysosome and endosome membranes by LAMTOR1. {ECO:0000269|PubMed:19177150}.	4	3	3	2	3	2
Q07797	LG3BP_MOUSE	Galectin-3-binding protein (Cyp-C-associated protein) (CyCAP) (Lectin galactoside-binding soluble 3-binding protein) (Protein MAMA)	Lgals3bp	0	0.601299	0.391777	0	cell adhesion [GO:0007155]	extracellular space [GO:0005615]; membrane [GO:0016020]	extracellular space [GO:0005615]; membrane [GO:0016020]; scavenger receptor activity [GO:0005044]; cell adhesion [GO:0007155]	scavenger receptor activity [GO:0005044]	SUBCELLULAR LOCATION: Secreted {ECO:0000250|UniProtKB:Q08380}. Secreted, extracellular space, extracellular matrix {ECO:0000269|PubMed:8119883}.	4	4	4	3	5	3
Q9D9P8	LCFC1_MOUSE	Sperm-egg fusion protein LLCFC1 (LLLL and CFNLAS motif-containing protein 1) (MSSP-binding protein CTM-1) (Sperm-oocyte fusion required protein 1)	Llcfc1	0	1.33314	0.675163	0	fusion of sperm to egg plasma membrane involved in single fertilization [GO:0007342]	extracellular region [GO:0005576]	extracellular region [GO:0005576]; fusion of sperm to egg plasma membrane involved in single fertilization [GO:0007342]		SUBCELLULAR LOCATION: Secreted {ECO:0000305}.	2	3	3	3	3	1
P55302	AMRP_MOUSE	Alpha-2-macroglobulin receptor-associated protein (Alpha-2-MRAP) (Heparin-binding protein 44) (HBP-44) (Low density lipoprotein receptor-related protein-associated protein 1) (RAP)	Lrpap1	0	0.853848	0.194698	0	amyloid-beta clearance by transcytosis [GO:0150093]; negative regulation of amyloid-beta clearance [GO:1900222]; negative regulation of receptor internalization [GO:0002091]; negative regulation of very-low-density lipoprotein particle clearance [GO:0010916]; regulation of receptor-mediated endocytosis [GO:0048259]; signal transduction [GO:0007165]	cell surface [GO:0009986]; cis-Golgi network [GO:0005801]; endomembrane system [GO:0012505]; endoplasmic reticulum [GO:0005783]; endoplasmic reticulum-Golgi intermediate compartment [GO:0005793]; endosome [GO:0005768]; endosome lumen [GO:0031904]; Golgi apparatus [GO:0005794]; Golgi lumen [GO:0005796]; plasma membrane [GO:0005886]; rough endoplasmic reticulum lumen [GO:0048237]; vesicle [GO:00319…	cell surface [GO:0009986]; cis-Golgi network [GO:0005801]; endomembrane system [GO:0012505]; endoplasmic reticulum [GO:0005783]; endoplasmic reticulum-Golgi intermediate compartment [GO:0005793]; endosome [GO:0005768]; endosome lumen [GO:0031904]; Golgi apparatus [GO:0005794]; Golgi lumen [GO:0005796]; plasma membrane [GO:0005886]; rough endoplasmic reticulum lumen [GO:0048237]; vesicle [GO:00319…	heparin binding [GO:0008201]; lipase binding [GO:0035473]; low-density lipoprotein particle receptor binding [GO:0050750]; receptor antagonist activity [GO:0048019]; receptor ligand activity [GO:0048018]; very-low-density lipoprotein particle receptor binding [GO:0070326]	SUBCELLULAR LOCATION: Rough endoplasmic reticulum lumen {ECO:0000250|UniProtKB:P30533}. Endoplasmic reticulum-Golgi intermediate compartment lumen {ECO:0000250|UniProtKB:P30533}. Golgi apparatus, cis-Golgi network {ECO:0000250|UniProtKB:P30533}. Golgi apparatus lumen {ECO:0000250|UniProtKB:P30533}. Endosome lumen {ECO:0000250|UniProtKB:P30533}. Cell surface {ECO:0000250|UniProtKB:P30533}. Note=Ma…	12	10	14	12	12	11
Q61166	MARE1_MOUSE	Microtubule-associated protein RP/EB family member 1 (APC-binding protein EB1) (End-binding protein 1) (EB1)	Mapre1	0	0.341062	0.503629	0	attachment of mitotic spindle microtubules to kinetochore [GO:0051315]; cell division [GO:0051301]; cell migration [GO:0016477]; establishment of mitotic spindle orientation [GO:0000132]; microtubule bundle formation [GO:0001578]; microtubule polymerization [GO:0046785]; negative regulation of microtubule polymerization [GO:0031115]; non-motile cilium assembly [GO:1905515]; positive regulation of…	cell projection [GO:0042995]; cell projection membrane [GO:0031253]; centrosome [GO:0005813]; ciliary basal body [GO:0036064]; cortical microtubule cytoskeleton [GO:0030981]; cytoplasmic microtubule [GO:0005881]; focal adhesion [GO:0005925]; Golgi apparatus [GO:0005794]; microtubule [GO:0005874]; microtubule cytoskeleton [GO:0015630]; microtubule organizing center [GO:0005815]; microtubule plus-e…	cell projection [GO:0042995]; cell projection membrane [GO:0031253]; centrosome [GO:0005813]; ciliary basal body [GO:0036064]; cortical microtubule cytoskeleton [GO:0030981]; cytoplasmic microtubule [GO:0005881]; focal adhesion [GO:0005925]; Golgi apparatus [GO:0005794]; microtubule [GO:0005874]; microtubule cytoskeleton [GO:0015630]; microtubule organizing center [GO:0005815]; microtubule plus-e…	identical protein binding [GO:0042802]; microtubule plus-end binding [GO:0051010]; molecular adaptor activity [GO:0060090]; protein kinase binding [GO:0019901]	SUBCELLULAR LOCATION: Cytoplasm, cytoskeleton {ECO:0000269|PubMed:15311282, ECO:0000269|PubMed:21357749, ECO:0000269|PubMed:24706950}. Cytoplasm, cytoskeleton, microtubule organizing center, centrosome {ECO:0000250|UniProtKB:Q15691}. Cytoplasm, cytoskeleton, spindle {ECO:0000250|UniProtKB:Q15691}. Cytoplasm, cytoskeleton, spindle pole {ECO:0000250|UniProtKB:Q15691}. Note=Associated with the micro…	2	1	2	0	0	0
Q8VCF0	MAVS_MOUSE	Mitochondrial antiviral-signaling protein (MAVS) (CARD adapter inducing interferon beta) (Cardif) (Interferon beta promoter stimulator protein 1) (IPS-1) (Virus-induced-signaling adapter) (VISA)	Mavs	1	0.715577	0.991742	0	activation of innate immune response [GO:0002218]; antiviral innate immune response [GO:0140374]; cellular response to exogenous dsRNA [GO:0071360]; cellular response to interferon-beta [GO:0035458]; cytoplasmic pattern recognition receptor signaling pathway [GO:0002753]; defense response to bacterium [GO:0042742]; defense response to virus [GO:0051607]; innate immune response [GO:0045087]; negat…	mitochondrial membrane [GO:0031966]; mitochondrial outer membrane [GO:0005741]; mitochondrion [GO:0005739]; peroxisomal membrane [GO:0005778]; peroxisome [GO:0005777]	mitochondrial membrane [GO:0031966]; mitochondrial outer membrane [GO:0005741]; mitochondrion [GO:0005739]; peroxisomal membrane [GO:0005778]; peroxisome [GO:0005777]; CARD domain binding [GO:0050700]; identical protein binding [GO:0042802]; molecular adaptor activity [GO:0060090]; molecular condensate scaffold activity [GO:0140693]; protein kinase binding [GO:0019901]; RIG-I binding [GO:0039552]…	CARD domain binding [GO:0050700]; identical protein binding [GO:0042802]; molecular adaptor activity [GO:0060090]; molecular condensate scaffold activity [GO:0140693]; protein kinase binding [GO:0019901]; RIG-I binding [GO:0039552]; signaling adaptor activity [GO:0035591]	SUBCELLULAR LOCATION: Mitochondrion outer membrane {ECO:0000250|UniProtKB:Q7Z434}; Single-pass membrane protein {ECO:0000250|UniProtKB:Q7Z434}. Mitochondrion {ECO:0000269|PubMed:23582325}. Peroxisome {ECO:0000250|UniProtKB:Q7Z434}.	1	0	1	1	3	3
Q9Z2D8	MBD3_MOUSE	Methyl-CpG-binding domain protein 3 (Methyl-CpG-binding protein MBD3)	Mbd3	0	1.17269	0.696504	0	chromatin remodeling [GO:0006338]; DNA methylation-dependent heterochromatin formation [GO:0006346]; embryonic organ development [GO:0048568]; heart development [GO:0007507]; in utero embryonic development [GO:0001701]; negative regulation of DNA-templated transcription [GO:0045892]; negative regulation of transcription by RNA polymerase II [GO:0000122]; positive regulation of DNA-templated trans…	chromatin [GO:0000785]; cytoplasm [GO:0005737]; heterochromatin [GO:0000792]; nucleoplasm [GO:0005654]; nucleus [GO:0005634]; NuRD complex [GO:0016581]; protein-containing complex [GO:0032991]	chromatin [GO:0000785]; cytoplasm [GO:0005737]; heterochromatin [GO:0000792]; nucleoplasm [GO:0005654]; nucleus [GO:0005634]; NuRD complex [GO:0016581]; protein-containing complex [GO:0032991]; chromatin binding [GO:0003682]; DNA binding [GO:0003677]; methyl-CpG binding [GO:0008327]; chromatin remodeling [GO:0006338]; DNA methylation-dependent heterochromatin formation [GO:0006346]; embryonic org…	chromatin binding [GO:0003682]; DNA binding [GO:0003677]; methyl-CpG binding [GO:0008327]	SUBCELLULAR LOCATION: Nucleus {ECO:0000269|PubMed:14610093, ECO:0000269|PubMed:9774669}. Chromosome {ECO:0000250|UniProtKB:O95983}. Note=Detected on chromatin, at promoter regions of active genes (By similarity). Nuclear, in discrete foci (PubMed:9774669). {ECO:0000250|UniProtKB:O95983, ECO:0000269|PubMed:9774669}.	26	23	23	27	24	24
P41317	MBL2_MOUSE	Mannose-binding protein C (MBP-C) (Mannan-binding protein) (RA-reactive factor P28A subunit) (RARF/P28A)	Mbl2	0	0.809948	0.142242	0	antiviral innate immune response [GO:0140374]; cell surface pattern recognition receptor signaling pathway [GO:0002752]; complement activation, classical pathway [GO:0006958]; complement activation, lectin pathway [GO:0001867]; defense response to Gram-positive bacterium [GO:0050830]; innate immune response [GO:0045087]; killing by host of symbiont cells [GO:0051873]; negative regulation of viral…	collagen trimer [GO:0005581]; extracellular space [GO:0005615]; multivesicular body [GO:0005771]; protein-containing complex [GO:0032991]; serine-type endopeptidase complex [GO:1905370]	collagen trimer [GO:0005581]; extracellular space [GO:0005615]; multivesicular body [GO:0005771]; protein-containing complex [GO:0032991]; serine-type endopeptidase complex [GO:1905370]; calcium ion binding [GO:0005509]; calcium-dependent protein binding [GO:0048306]; galactose binding [GO:0005534]; identical protein binding [GO:0042802]; mannose binding [GO:0005537]; phosphatidylinositol-4-phosp…	calcium ion binding [GO:0005509]; calcium-dependent protein binding [GO:0048306]; galactose binding [GO:0005534]; identical protein binding [GO:0042802]; mannose binding [GO:0005537]; phosphatidylinositol-4-phosphate binding [GO:0070273]; protease binding [GO:0002020]; protein self-association [GO:0043621]; signaling receptor binding [GO:0005102]	SUBCELLULAR LOCATION: Secreted {ECO:0000250}.	6	8	6	6	5	7
E9PV86	MCTP1_MOUSE	Multiple C2 and transmembrane domain-containing protein 1	Mctp1	3	0.193482	0.143916	0	negative regulation of cell migration [GO:0030336]; negative regulation of endocytosis [GO:0045806]; negative regulation of response to oxidative stress [GO:1902883]; regulation of neurotransmitter secretion [GO:0046928]	endoplasmic reticulum membrane [GO:0005789]; membrane [GO:0016020]; recycling endosome [GO:0055037]; synaptic vesicle membrane [GO:0030672]	endoplasmic reticulum membrane [GO:0005789]; membrane [GO:0016020]; recycling endosome [GO:0055037]; synaptic vesicle membrane [GO:0030672]; calcium ion binding [GO:0005509]; negative regulation of cell migration [GO:0030336]; negative regulation of endocytosis [GO:0045806]; negative regulation of response to oxidative stress [GO:1902883]; regulation of neurotransmitter secretion [GO:0046928]	calcium ion binding [GO:0005509]	SUBCELLULAR LOCATION: Cytoplasmic vesicle, secretory vesicle, synaptic vesicle membrane {ECO:0000250|UniProtKB:D4ABL6}; Multi-pass membrane protein {ECO:0000255}. Recycling endosome {ECO:0000250|UniProtKB:D4ABL6}. Endoplasmic reticulum membrane {ECO:0000250|UniProtKB:A1ZBD6}.	44	45	47	45	43	40
Q9CW42	MARC1_MOUSE	Mitochondrial amidoxime-reducing component 1 (mARC1) (EC 1.7.-.-) (Molybdenum cofactor sulfurase C-terminal domain-containing protein 1) (MOSC domain-containing protein 1) (Moco sulfurase C-terminal domain-containing protein 1)	Mtarc1	1	1.84251	1.16552	0	cellular detoxification of nitrogen compound [GO:0070458]; nitrate metabolic process [GO:0042126]; nitric oxide biosynthetic process [GO:0006809]	mitochondrial inner membrane [GO:0005743]; mitochondrial outer membrane [GO:0005741]; mitochondrion [GO:0005739]; nitric-oxide synthase complex [GO:1903958]	mitochondrial inner membrane [GO:0005743]; mitochondrial outer membrane [GO:0005741]; mitochondrion [GO:0005739]; nitric-oxide synthase complex [GO:1903958]; molybdenum ion binding [GO:0030151]; molybdopterin cofactor binding [GO:0043546]; nitrate reductase activity [GO:0008940]; nitrite reductase (NO-forming) activity [GO:0050421]; nitrite reductase activity [GO:0098809]; oxidoreductase activity…	molybdenum ion binding [GO:0030151]; molybdopterin cofactor binding [GO:0043546]; nitrate reductase activity [GO:0008940]; nitrite reductase (NO-forming) activity [GO:0050421]; nitrite reductase activity [GO:0098809]; oxidoreductase activity, acting on other nitrogenous compounds as donors [GO:0016661]; pyridoxal phosphate binding [GO:0030170]	SUBCELLULAR LOCATION: Mitochondrion outer membrane {ECO:0000250|UniProtKB:Q5VT66}; Single-pass type II membrane protein {ECO:0000250|UniProtKB:Q5VT66}. Membrane {ECO:0000250|UniProtKB:Q5VT66}; Lipid-anchor {ECO:0000250|UniProtKB:Q5VT66}. Note=Mitochondrial import is mediated by AA 1-40 and requires ATP. {ECO:0000250|UniProtKB:Q5VT66}.	6	7	6	8	7	5
Q922Q1	MARC2_MOUSE	Mitochondrial amidoxime reducing component 2 (mARC2) (EC 1.7.-.-) (Molybdenum cofactor sulfurase C-terminal domain-containing protein 2) (MOSC domain-containing protein 2) (Moco sulfurase C-terminal domain-containing protein 2)	Mtarc2	1	0.813716	0.396918	0	cellular detoxification of nitrogen compound [GO:0070458]; nitrate metabolic process [GO:0042126]; nitric oxide biosynthetic process [GO:0006809]	mitochondrial inner membrane [GO:0005743]; mitochondrial outer membrane [GO:0005741]; mitochondrion [GO:0005739]; peroxisome [GO:0005777]	mitochondrial inner membrane [GO:0005743]; mitochondrial outer membrane [GO:0005741]; mitochondrion [GO:0005739]; peroxisome [GO:0005777]; molybdenum ion binding [GO:0030151]; molybdopterin cofactor binding [GO:0043546]; nitrate reductase activity [GO:0008940]; nitrite reductase activity [GO:0098809]; oxidoreductase activity, acting on other nitrogenous compounds as donors [GO:0016661]; pyridoxal…	molybdenum ion binding [GO:0030151]; molybdopterin cofactor binding [GO:0043546]; nitrate reductase activity [GO:0008940]; nitrite reductase activity [GO:0098809]; oxidoreductase activity, acting on other nitrogenous compounds as donors [GO:0016661]; pyridoxal phosphate binding [GO:0030170]	SUBCELLULAR LOCATION: Mitochondrion outer membrane {ECO:0000250|UniProtKB:P0C2C3}; Peripheral membrane protein {ECO:0000250|UniProtKB:P0C2C3}. Peroxisome {ECO:0000269|PubMed:17768142}.	5	5	6	6	7	6
Q5HZI1	MTUS1_MOUSE	Microtubule-associated tumor suppressor 1 homolog (AT2 receptor-binding protein) (Angiotensin-II type 2 receptor-interacting protein) (Coiled-coiled tumor suppressor gene 1 protein) (Mitochondrial tumor suppressor 1 homolog)	Mtus1	0	0.0172139	-0.00926526	0	cell cycle [GO:0007049]; regulation of macrophage chemotaxis [GO:0010758]	cytoplasm [GO:0005737]; Golgi apparatus [GO:0005794]; microtubule cytoskeleton [GO:0015630]; mitochondrion [GO:0005739]; nucleolus [GO:0005730]; nucleus [GO:0005634]; plasma membrane [GO:0005886]	cytoplasm [GO:0005737]; Golgi apparatus [GO:0005794]; microtubule cytoskeleton [GO:0015630]; mitochondrion [GO:0005739]; nucleolus [GO:0005730]; nucleus [GO:0005634]; plasma membrane [GO:0005886]; microtubule binding [GO:0008017]; cell cycle [GO:0007049]; regulation of macrophage chemotaxis [GO:0010758]	microtubule binding [GO:0008017]	SUBCELLULAR LOCATION: Mitochondrion {ECO:0000250}. Golgi apparatus. Cell membrane. Nucleus. Note=In neurons, translocates into the nucleus after treatment with angiotensin-II.	21	23	23	23	18	21
Q9EQS3	MYCBP_MOUSE	c-Myc-binding protein (Associate of Myc 1) (AMY-1)	Mycbp	0	1.70158	0.623645	0	regulation of DNA-templated transcription [GO:0006355]	cytoplasm [GO:0005737]; mitochondrion [GO:0005739]; nucleoplasm [GO:0005654]; nucleus [GO:0005634]	cytoplasm [GO:0005737]; mitochondrion [GO:0005739]; nucleoplasm [GO:0005654]; nucleus [GO:0005634]; transcription coactivator activity [GO:0003713]; regulation of DNA-templated transcription [GO:0006355]	transcription coactivator activity [GO:0003713]	SUBCELLULAR LOCATION: Cytoplasm {ECO:0000250}. Nucleus {ECO:0000250}. Note=Translocates into the nucleus in the S phase of the cell cycle. {ECO:0000250}.	2	2	3	4	3	2
Q8BLF1	NCEH1_MOUSE	Neutral cholesterol ester hydrolase 1 (NCEH) (EC 3.1.1.-) (Acetylalkylglycerol acetylhydrolase) (2-acetyl MAGE hydrolase) (EC 3.1.1.71) (Arylacetamide deacetylase-like 1) (Chlorpyrifos oxon-binding protein) (CPO-BP)	Nceh1	0	0.28043	0.227299	0	ether lipid metabolic process [GO:0046485]; lipid catabolic process [GO:0016042]; xenobiotic metabolic process [GO:0006805]	endoplasmic reticulum [GO:0005783]; membrane [GO:0016020]; plasma membrane [GO:0005886]	endoplasmic reticulum [GO:0005783]; membrane [GO:0016020]; plasma membrane [GO:0005886]; acetylalkylglycerol acetylhydrolase activity [GO:0047378]; phosphate ion binding [GO:0042301]; serine hydrolase activity [GO:0017171]; ether lipid metabolic process [GO:0046485]; lipid catabolic process [GO:0016042]; xenobiotic metabolic process [GO:0006805]	acetylalkylglycerol acetylhydrolase activity [GO:0047378]; phosphate ion binding [GO:0042301]; serine hydrolase activity [GO:0017171]	SUBCELLULAR LOCATION: Cell membrane {ECO:0000250|UniProtKB:Q6PIU2}; Single-pass type II membrane protein {ECO:0000250|UniProtKB:Q6PIU2}. Microsome {ECO:0000269|PubMed:18782767}.	5	4	6	3	4	3
O09000	NCOA3_MOUSE	Nuclear receptor coactivator 3 (NCoA-3) (EC 2.3.1.48) (Amplified in breast cancer-1 protein homolog) (AIB-1) (CBP-interacting protein) (p/CIP) (pCIP) (Receptor-associated coactivator 3) (RAC-3) (Steroid receptor coactivator protein 3) (SRC-3) (Thyroid hormone receptor activator molecule 1) (ACTR) (TRAM-1)	Ncoa3	0	1.75206	1.04842	0	cell dedifferentiation [GO:0043697]; cellular response to estradiol stimulus [GO:0071392]; cellular response to hormone stimulus [GO:0032870]; labyrinthine layer morphogenesis [GO:0060713]; mammary gland branching involved in thelarche [GO:0060744]; multicellular organism growth [GO:0035264]; negative regulation of apoptotic process [GO:0043066]; negative regulation of stem cell differentiation […	chromatin [GO:0000785]; cytoplasm [GO:0005737]; cytosol [GO:0005829]; nucleoplasm [GO:0005654]; nucleus [GO:0005634]; perinuclear region of cytoplasm [GO:0048471]; protein-containing complex [GO:0032991]; RNA polymerase II transcription regulator complex [GO:0090575]	chromatin [GO:0000785]; cytoplasm [GO:0005737]; cytosol [GO:0005829]; nucleoplasm [GO:0005654]; nucleus [GO:0005634]; perinuclear region of cytoplasm [GO:0048471]; protein-containing complex [GO:0032991]; RNA polymerase II transcription regulator complex [GO:0090575]; chromatin binding [GO:0003682]; disordered domain specific binding [GO:0097718]; DNA-binding transcription activator activity, RNA…	chromatin binding [GO:0003682]; disordered domain specific binding [GO:0097718]; DNA-binding transcription activator activity, RNA polymerase II-specific [GO:0001228]; histone acetyltransferase activity [GO:0004402]; molecular adaptor activity [GO:0060090]; nuclear androgen receptor binding [GO:0050681]; nuclear estrogen receptor binding [GO:0030331]; nuclear receptor binding [GO:0016922]; nuclea…	SUBCELLULAR LOCATION: Cytoplasm {ECO:0000250}. Nucleus {ECO:0000255|PROSITE-ProRule:PRU00981}. Note=Mainly cytoplasmic and weakly nuclear. Upon TNF activation and subsequent phosphorylation, it translocates from the cytoplasm to the nucleus (By similarity). {ECO:0000250}.	5	6	8	7	6	6
Q8VIH1	NOBOX_MOUSE	Homeobox protein NOBOX (Homeodomain-containing protein OG-2) (Newborn ovary homeobox protein) (Oocyte-specific homeobox protein)	Nobox	0	1.57144	0.942766	0	oogenesis [GO:0048477]; ovarian follicle development [GO:0001541]; positive regulation of transcription by RNA polymerase II [GO:0045944]; regulation of transcription by RNA polymerase II [GO:0006357]; transcription by RNA polymerase II [GO:0006366]	cytoplasm [GO:0005737]; nucleus [GO:0005634]; transcription regulator complex [GO:0005667]	cytoplasm [GO:0005737]; nucleus [GO:0005634]; transcription regulator complex [GO:0005667]; DNA-binding transcription activator activity, RNA polymerase II-specific [GO:0001228]; DNA-binding transcription factor activity [GO:0003700]; DNA-binding transcription factor activity, RNA polymerase II-specific [GO:0000981]; RNA polymerase II cis-regulatory region sequence-specific DNA binding [GO:000097…	DNA-binding transcription activator activity, RNA polymerase II-specific [GO:0001228]; DNA-binding transcription factor activity [GO:0003700]; DNA-binding transcription factor activity, RNA polymerase II-specific [GO:0000981]; RNA polymerase II cis-regulatory region sequence-specific DNA binding [GO:0000978]; sequence-specific DNA binding [GO:0043565]	SUBCELLULAR LOCATION: Nucleus.	11	12	10	10	13	10
Q9CRD0	OCAD1_MOUSE	OCIA domain-containing protein 1	Ociad1	0	1.59633	0.553281	0	regulation of stem cell differentiation [GO:2000736]	endosome [GO:0005768]; mitochondrion [GO:0005739]	endosome [GO:0005768]; mitochondrion [GO:0005739]; regulation of stem cell differentiation [GO:2000736]		SUBCELLULAR LOCATION: Endosome {ECO:0000269|PubMed:12889067, ECO:0000269|PubMed:23972987}.	8	8	8	9	9	9
Q3B7Z2	OSBP1_MOUSE	Oxysterol-binding protein 1	Osbp	0	0.486256	0.386635	0	ceramide transport [GO:0035627]; intracellular cholesterol transport [GO:0032367]; phospholipid transport [GO:0015914]; positive regulation of insulin secretion involved in cellular response to glucose stimulus [GO:0035774]; positive regulation of secretory granule organization [GO:1904411]; positive regulation of tyrosine phosphorylation of STAT protein [GO:0042531]; sphingomyelin biosynthetic p…	cell junction [GO:0030054]; cytoplasm [GO:0005737]; cytosol [GO:0005829]; endoplasmic reticulum membrane [GO:0005789]; Golgi apparatus [GO:0005794]; Golgi membrane [GO:0000139]; intracellular membrane-bounded organelle [GO:0043231]; membrane [GO:0016020]; nucleolus [GO:0005730]; nucleoplasm [GO:0005654]; perinuclear endoplasmic reticulum [GO:0097038]; perinuclear region of cytoplasm [GO:0048471];…	cell junction [GO:0030054]; cytoplasm [GO:0005737]; cytosol [GO:0005829]; endoplasmic reticulum membrane [GO:0005789]; Golgi apparatus [GO:0005794]; Golgi membrane [GO:0000139]; intracellular membrane-bounded organelle [GO:0043231]; membrane [GO:0016020]; nucleolus [GO:0005730]; nucleoplasm [GO:0005654]; perinuclear endoplasmic reticulum [GO:0097038]; perinuclear region of cytoplasm [GO:0048471];…	phosphatidylinositol-4-phosphate binding [GO:0070273]; protein domain specific binding [GO:0019904]; sterol binding [GO:0032934]; sterol transfer activity [GO:0120015]; sterol transporter activity [GO:0015248]	SUBCELLULAR LOCATION: Cytoplasm, cytosol {ECO:0000250|UniProtKB:P22059}. Cytoplasm, perinuclear region {ECO:0000250|UniProtKB:P22059}. Golgi apparatus membrane {ECO:0000250|UniProtKB:P22059}; Peripheral membrane protein {ECO:0000250|UniProtKB:P22059}. Endoplasmic reticulum membrane {ECO:0000250|UniProtKB:P22059}; Peripheral membrane protein {ECO:0000250|UniProtKB:P22059}. Note=Predominantly cytos…	2	1	3	2	1	3
P09103	PDIA1_MOUSE	Protein disulfide-isomerase (PDI) (EC 5.3.4.1) (Cellular thyroid hormone-binding protein) (Endoplasmic reticulum resident protein 59) (ER protein 59) (ERp59) (Prolyl 4-hydroxylase subunit beta) (p55)	P4hb	0	0.460044	-0.161332	0	cellular response to hypoxia [GO:0071456]; cellular response to interleukin-7 [GO:0098761]; endoplasmic reticulum to Golgi vesicle-mediated transport [GO:0006888]; insulin processing [GO:0030070]; positive regulation of cell adhesion [GO:0045785]; positive regulation of substrate adhesion-dependent cell spreading [GO:1900026]; positive regulation of viral entry into host cell [GO:0046598]; protei…	cytoskeleton [GO:0005856]; cytosol [GO:0005829]; endoplasmic reticulum [GO:0005783]; endoplasmic reticulum chaperone complex [GO:0034663]; endoplasmic reticulum lumen [GO:0005788]; endoplasmic reticulum-Golgi intermediate compartment [GO:0005793]; external side of plasma membrane [GO:0009897]; lamellipodium [GO:0030027]; melanosome [GO:0042470]; procollagen-proline 4-dioxygenase complex [GO:00162…	cytoskeleton [GO:0005856]; cytosol [GO:0005829]; endoplasmic reticulum [GO:0005783]; endoplasmic reticulum chaperone complex [GO:0034663]; endoplasmic reticulum lumen [GO:0005788]; endoplasmic reticulum-Golgi intermediate compartment [GO:0005793]; external side of plasma membrane [GO:0009897]; lamellipodium [GO:0030027]; melanosome [GO:0042470]; procollagen-proline 4-dioxygenase complex [GO:00162…	actin binding [GO:0003779]; enzyme binding [GO:0019899]; integrin binding [GO:0005178]; procollagen-proline 4-dioxygenase activity [GO:0004656]; protein disulfide isomerase activity [GO:0003756]; protein heterodimerization activity [GO:0046982]; protein-containing complex binding [GO:0044877]; protein-disulfide reductase activity [GO:0015035]; thiol oxidase activity [GO:0016972]	SUBCELLULAR LOCATION: Endoplasmic reticulum {ECO:0000250|UniProtKB:P07237}. Endoplasmic reticulum lumen {ECO:0000250|UniProtKB:P07237}. Melanosome {ECO:0000250|UniProtKB:P07237}. Cell membrane {ECO:0000269|PubMed:21670307}; Peripheral membrane protein {ECO:0000305}. Note=Highly abundant. In some cell types, seems to be also secreted or associated with the plasma membrane, where it undergoes const…	43	42	43	40	42	41
P29341	PABP1_MOUSE	Polyadenylate-binding protein 1 (PABP-1) (Poly(A)-binding protein 1)	Pabpc1	0	0.385416	0.257215	0	CRD-mediated mRNA stabilization [GO:0070934]; mRNA processing [GO:0006397]; negative regulation of nuclear-transcribed mRNA catabolic process, deadenylation-dependent decay [GO:1900152]; negative regulation of nuclear-transcribed mRNA catabolic process, nonsense-mediated decay [GO:2000623]; nuclear-transcribed mRNA catabolic process, nonsense-mediated decay [GO:0000184]; positive regulation of cy…	catalytic step 2 spliceosome [GO:0071013]; cell leading edge [GO:0031252]; cytoplasm [GO:0005737]; cytoplasmic ribonucleoprotein granule [GO:0036464]; cytoplasmic stress granule [GO:0010494]; cytosol [GO:0005829]; dendrite [GO:0030425]; lamellipodium [GO:0030027]; mCRD-mediated mRNA stability complex [GO:0106002]; messenger ribonucleoprotein complex [GO:1990124]; nucleus [GO:0005634]; ribonucleop…	catalytic step 2 spliceosome [GO:0071013]; cell leading edge [GO:0031252]; cytoplasm [GO:0005737]; cytoplasmic ribonucleoprotein granule [GO:0036464]; cytoplasmic stress granule [GO:0010494]; cytosol [GO:0005829]; dendrite [GO:0030425]; lamellipodium [GO:0030027]; mCRD-mediated mRNA stability complex [GO:0106002]; messenger ribonucleoprotein complex [GO:1990124]; nucleus [GO:0005634]; ribonucleop…	mRNA 3'-UTR binding [GO:0003730]; mRNA binding [GO:0003729]; poly(A) binding [GO:0008143]; poly(U) RNA binding [GO:0008266]; RNA binding [GO:0003723]	SUBCELLULAR LOCATION: Cytoplasm {ECO:0000250|UniProtKB:P11940}. Cytoplasm, Stress granule {ECO:0000250|UniProtKB:P11940}. Nucleus {ECO:0000250|UniProtKB:P11940}. Cell projection, lamellipodium {ECO:0000250|UniProtKB:P11940}. Note=Localized in cytoplasmic mRNP granules containing untranslated mRNAs (By similarity). Shuttles between the cytoplasm and the nucleus (By similarity). During stress and i…	11	13	12	13	12	11
Q91YZ8	Q91YZ8_MOUSE	Polyadenylate-binding protein (PABP)	Pabpc4	0	0.547197	1.04012	0	myeloid cell development [GO:0061515]; regulation of mRNA stability [GO:0043488]	cytoplasm [GO:0005737]; cytoplasmic stress granule [GO:0010494]; cytosol [GO:0005829]; nucleus [GO:0005634]; ribonucleoprotein complex [GO:1990904]	cytoplasm [GO:0005737]; cytoplasmic stress granule [GO:0010494]; cytosol [GO:0005829]; nucleus [GO:0005634]; ribonucleoprotein complex [GO:1990904]; mRNA 3'-UTR binding [GO:0003730]; mRNA binding [GO:0003729]; poly(A) binding [GO:0008143]; poly(U) RNA binding [GO:0008266]; myeloid cell development [GO:0061515]; regulation of mRNA stability [GO:0043488]	mRNA 3'-UTR binding [GO:0003730]; mRNA binding [GO:0003729]; poly(A) binding [GO:0008143]; poly(U) RNA binding [GO:0008266]	SUBCELLULAR LOCATION: Cytoplasm {ECO:0000256|RuleBase:RU362004}.	0	1	0	2	2	2
Q9DCG6	PBLD1_MOUSE	Phenazine biosynthesis-like domain-containing protein 1 (EC 5.1.-.-)	Pbld1	0	1.33192	0.266464	0	biosynthetic process [GO:0009058]; maintenance of gastrointestinal epithelium [GO:0030277]; negative regulation of transforming growth factor beta receptor signaling pathway [GO:0030512]	cytoplasm [GO:0005737]	cytoplasm [GO:0005737]; identical protein binding [GO:0042802]; isomerase activity [GO:0016853]; biosynthetic process [GO:0009058]; maintenance of gastrointestinal epithelium [GO:0030277]; negative regulation of transforming growth factor beta receptor signaling pathway [GO:0030512]	identical protein binding [GO:0042802]; isomerase activity [GO:0016853]		11	9	9	8	7	8
Q9CXN7	PBLD2_MOUSE	Phenazine biosynthesis-like domain-containing protein 2 (EC 5.1.-.-)	Pbld2	0	0.038197	0.0175432	0	biosynthetic process [GO:0009058]; maintenance of gastrointestinal epithelium [GO:0030277]; negative regulation of transforming growth factor beta receptor signaling pathway [GO:0030512]	cytoplasm [GO:0005737]	cytoplasm [GO:0005737]; identical protein binding [GO:0042802]; isomerase activity [GO:0016853]; biosynthetic process [GO:0009058]; maintenance of gastrointestinal epithelium [GO:0030277]; negative regulation of transforming growth factor beta receptor signaling pathway [GO:0030512]	identical protein binding [GO:0042802]; isomerase activity [GO:0016853]		5	8	9	7	7	7
P60335	PCBP1_MOUSE	Poly(rC)-binding protein 1 (Alpha-CP1) (Heterogeneous nuclear ribonucleoprotein E1) (hnRNP E1)	Pcbp1	0	0.257921	0.229158	0	mRNA processing [GO:0006397]; positive regulation of transcription by RNA polymerase II [GO:0045944]; viral RNA genome replication [GO:0039694]	cytoplasm [GO:0005737]; cytoplasmic ribonucleoprotein granule [GO:0036464]; cytosol [GO:0005829]; nuclear speck [GO:0016607]; nucleoplasm [GO:0005654]; nucleus [GO:0005634]; postsynaptic density [GO:0014069]; ribonucleoprotein complex [GO:1990904]	cytoplasm [GO:0005737]; cytoplasmic ribonucleoprotein granule [GO:0036464]; cytosol [GO:0005829]; nuclear speck [GO:0016607]; nucleoplasm [GO:0005654]; nucleus [GO:0005634]; postsynaptic density [GO:0014069]; ribonucleoprotein complex [GO:1990904]; DNA-binding transcription factor activity, RNA polymerase II-specific [GO:0000981]; mRNA 3'-UTR binding [GO:0003730]; mRNA binding [GO:0003729]; RNA b…	DNA-binding transcription factor activity, RNA polymerase II-specific [GO:0000981]; mRNA 3'-UTR binding [GO:0003730]; mRNA binding [GO:0003729]; RNA binding [GO:0003723]; sequence-specific single stranded DNA binding [GO:0098847]; single-stranded DNA binding [GO:0003697]; translation activator activity [GO:0008494]	SUBCELLULAR LOCATION: Nucleus {ECO:0000250|UniProtKB:Q15365}. Cytoplasm {ECO:0000250|UniProtKB:Q15365}. Note=Loosely bound in the nucleus. May shuttle between the nucleus and the cytoplasm. {ECO:0000250|UniProtKB:Q15365}.	4	4	3	6	5	3
Q3TT81	Q3TT81_MOUSE	Poly(rC) binding protein 2	Pcbp2	0	0.0414603	0.0637213	0			RNA binding [GO:0003723]	RNA binding [GO:0003723]		2	2	2	0	2	0
Q8BGX1	PED1B_MOUSE	PC-esterase domain-containing protein 1B (Protein FAM113B)	Pced1b	0	1.47588	0.354461	0						15	15	16	16	16	15
Q922R8	PDIA6_MOUSE	Protein disulfide-isomerase A6 (EC 5.3.4.1) (Thioredoxin domain-containing protein 7)	Pdia6	0	1.95573	1.26926	0	platelet activation [GO:0030168]; platelet aggregation [GO:0070527]; response to endoplasmic reticulum stress [GO:0034976]	cytosol [GO:0005829]; endoplasmic reticulum [GO:0005783]; endoplasmic reticulum chaperone complex [GO:0034663]; endoplasmic reticulum lumen [GO:0005788]; endoplasmic reticulum-Golgi intermediate compartment [GO:0005793]; extracellular space [GO:0005615]; melanosome [GO:0042470]; plasma membrane [GO:0005886]; smooth endoplasmic reticulum [GO:0005790]	cytosol [GO:0005829]; endoplasmic reticulum [GO:0005783]; endoplasmic reticulum chaperone complex [GO:0034663]; endoplasmic reticulum lumen [GO:0005788]; endoplasmic reticulum-Golgi intermediate compartment [GO:0005793]; extracellular space [GO:0005615]; melanosome [GO:0042470]; plasma membrane [GO:0005886]; smooth endoplasmic reticulum [GO:0005790]; protein disulfide isomerase activity [GO:00037…	protein disulfide isomerase activity [GO:0003756]; protein-disulfide reductase activity [GO:0015035]	SUBCELLULAR LOCATION: Endoplasmic reticulum lumen {ECO:0000250|UniProtKB:Q15084}. Cell membrane {ECO:0000250|UniProtKB:Q15084}. Melanosome {ECO:0000250|UniProtKB:Q15084}.	16	16	16	16	17	14
Q9R0A0	PEX14_MOUSE	Peroxisomal membrane protein PEX14 (PTS1 receptor-docking protein) (Peroxin-14) (Peroxisomal membrane anchor protein PEX14)	Pex14	1	1.17288	0.642654	0	cellular response to reactive oxygen species [GO:0034614]; microtubule anchoring [GO:0034453]; negative regulation of DNA-templated transcription [GO:0045892]; peroxisome organization [GO:0007031]; peroxisome transport along microtubule [GO:0036250]; protein import into peroxisome matrix [GO:0016558]; protein import into peroxisome matrix, docking [GO:0016560]; protein import into peroxisome matr…	fibrillar center [GO:0001650]; peroxisomal importomer complex [GO:1990429]; peroxisomal membrane [GO:0005778]; peroxisome [GO:0005777]; protein-containing complex [GO:0032991]	fibrillar center [GO:0001650]; peroxisomal importomer complex [GO:1990429]; peroxisomal membrane [GO:0005778]; peroxisome [GO:0005777]; protein-containing complex [GO:0032991]; beta-tubulin binding [GO:0048487]; identical protein binding [GO:0042802]; microtubule binding [GO:0008017]; protein transmembrane transporter activity [GO:0008320]; protein-macromolecule adaptor activity [GO:0030674]; sig…	beta-tubulin binding [GO:0048487]; identical protein binding [GO:0042802]; microtubule binding [GO:0008017]; protein transmembrane transporter activity [GO:0008320]; protein-macromolecule adaptor activity [GO:0030674]; signaling receptor binding [GO:0005102]; transcription corepressor activity [GO:0003714]	SUBCELLULAR LOCATION: Peroxisome membrane {ECO:0000269|PubMed:12488033}; Single-pass membrane protein {ECO:0000250|UniProtKB:Q642G4}.	2	3	4	5	3	4
Q9WU28	PFD5_MOUSE	Prefoldin subunit 5 (EIG-1) (Myc modulator 1) (c-Myc-binding protein Mm-1)	Pfdn5	0	1.28603	0.683495	0	negative regulation of amyloid fibril formation [GO:1905907]; negative regulation of canonical Wnt signaling pathway [GO:0090090]; negative regulation of DNA-templated transcription [GO:0045892]; protein folding [GO:0006457]; retina development in camera-type eye [GO:0060041]; RNA polymerase I assembly [GO:1990113]; RNA polymerase II core complex assembly [GO:1990114]; RNA polymerase III assembly…	cytoplasm [GO:0005737]; cytosol [GO:0005829]; intermediate filament cytoskeleton [GO:0045111]; nucleus [GO:0005634]; prefoldin complex [GO:0016272]	cytoplasm [GO:0005737]; cytosol [GO:0005829]; intermediate filament cytoskeleton [GO:0045111]; nucleus [GO:0005634]; prefoldin complex [GO:0016272]; amyloid-beta binding [GO:0001540]; unfolded protein binding [GO:0051082]; negative regulation of amyloid fibril formation [GO:1905907]; negative regulation of canonical Wnt signaling pathway [GO:0090090]; negative regulation of DNA-templated transcri…	amyloid-beta binding [GO:0001540]; unfolded protein binding [GO:0051082]	SUBCELLULAR LOCATION: Nucleus {ECO:0000250}.	3	2	2	3	4	4
Q3TCN2	PLBL2_MOUSE	Putative phospholipase B-like 2 (EC 3.1.1.-) (66.3 kDa protein) (76 kDa protein) (p76) (LAMA-like protein 2) (Lamina ancestor homolog 2) (Phospholipase B domain-containing protein 2) [Cleaved into: Putative phospholipase B-like 2 28 kDa form; Putative phospholipase B-like 2 40 kDa form; Putative phospholipase B-like 2 15 kDa form]	Plbd2	0	1.11754	0.690371	0	phospholipid catabolic process [GO:0009395]	extracellular region [GO:0005576]; lysosomal lumen [GO:0043202]; lysosome [GO:0005764]	extracellular region [GO:0005576]; lysosomal lumen [GO:0043202]; lysosome [GO:0005764]; phospholipase activity [GO:0004620]; phospholipid catabolic process [GO:0009395]	phospholipase activity [GO:0004620]	SUBCELLULAR LOCATION: Lysosome lumen {ECO:0000269|PubMed:17007843, ECO:0000269|PubMed:17105447}.	4	6	4	3	4	4
Q9DBG5	PLIN3_MOUSE	Perilipin-3 (Cargo selection protein TIP47) (Mannose-6-phosphate receptor-binding protein 1)	Plin3	0	0.926066	1.04787	0	cellular response to glucose starvation [GO:0042149]; lipid droplet disassembly [GO:1905691]; lipid storage [GO:0019915]; positive regulation of sequestering of triglyceride [GO:0010890]	cytosol [GO:0005829]; endosome membrane [GO:0010008]; lipid droplet [GO:0005811]	cytosol [GO:0005829]; endosome membrane [GO:0010008]; lipid droplet [GO:0005811]; cellular response to glucose starvation [GO:0042149]; lipid droplet disassembly [GO:1905691]; lipid storage [GO:0019915]; positive regulation of sequestering of triglyceride [GO:0010890]		SUBCELLULAR LOCATION: Lipid droplet {ECO:0000250|UniProtKB:O60664}. Endosome membrane {ECO:0000250|UniProtKB:O60664}; Peripheral membrane protein {ECO:0000250|UniProtKB:O60664}; Cytoplasmic side {ECO:0000250|UniProtKB:O60664}. Cytoplasm {ECO:0000250|UniProtKB:O60664}. Note=Membrane associated on endosomes. Detected in the envelope and the core of lipid bodies and in lipid sails. {ECO:0000250|UniP…	0	2	2	3	2	2
D3Z3S1	D3Z3S1_MOUSE	Prolactin regulatory element-binding protein (Mammalian guanine nucleotide exchange factor mSec12)	Preb	1	0.702335	0.540943	0	endoplasmic reticulum to Golgi vesicle-mediated transport [GO:0006888]; protein transport [GO:0015031]; regulation of COPII vesicle coating [GO:0003400]	endoplasmic reticulum membrane [GO:0005789]; nucleus [GO:0005634]	endoplasmic reticulum membrane [GO:0005789]; nucleus [GO:0005634]; GTPase activator activity [GO:0005096]; guanyl-nucleotide exchange factor activity [GO:0005085]; endoplasmic reticulum to Golgi vesicle-mediated transport [GO:0006888]; protein transport [GO:0015031]; regulation of COPII vesicle coating [GO:0003400]	GTPase activator activity [GO:0005096]; guanyl-nucleotide exchange factor activity [GO:0005085]	SUBCELLULAR LOCATION: Endoplasmic reticulum membrane {ECO:0000256|RuleBase:RU369019}; Single-pass membrane protein {ECO:0000256|RuleBase:RU369019}. Nucleus {ECO:0000256|RuleBase:RU369019}. Note=Concentrates at endoplasmic reticulum exit sites (ERES), also known as transitional endoplasmic reticulum (tER). {ECO:0000256|RuleBase:RU369019}.	2	1	2	1	3	3
Q3UPH1	PRRC1_MOUSE	Protein PRRC1 (Proline-rich and coiled-coil-containing protein 1)	Prrc1	0	1.98393	-0.914712	0		cytoplasm [GO:0005737]; Golgi apparatus [GO:0005794]	cytoplasm [GO:0005737]; Golgi apparatus [GO:0005794]; protein kinase A regulatory subunit binding [GO:0034237]	protein kinase A regulatory subunit binding [GO:0034237]	SUBCELLULAR LOCATION: Golgi apparatus {ECO:0000250|UniProtKB:Q5XJA3}. Cytoplasm {ECO:0000250|UniProtKB:Q5XJA3}.	8	8	9	7	7	7
O35226	PSMD4_MOUSE	26S proteasome non-ATPase regulatory subunit 4 (26S proteasome regulatory subunit RPN10) (26S proteasome regulatory subunit S5A) (Multiubiquitin chain-binding protein)	Psmd4	0	2.94785	0.794598	0	proteasome-mediated ubiquitin-dependent protein catabolic process [GO:0043161]	cytosol [GO:0005829]; nucleoplasm [GO:0005654]; nucleus [GO:0005634]; proteasome accessory complex [GO:0022624]; proteasome complex [GO:0000502]; proteasome regulatory particle, base subcomplex [GO:0008540]	cytosol [GO:0005829]; nucleoplasm [GO:0005654]; nucleus [GO:0005634]; proteasome accessory complex [GO:0022624]; proteasome complex [GO:0000502]; proteasome regulatory particle, base subcomplex [GO:0008540]; identical protein binding [GO:0042802]; molecular adaptor activity [GO:0060090]; polyubiquitin modification-dependent protein binding [GO:0031593]; proteasome-mediated ubiquitin-dependent pro…	identical protein binding [GO:0042802]; molecular adaptor activity [GO:0060090]; polyubiquitin modification-dependent protein binding [GO:0031593]		4	3	3	2	4	3
Q9WV91	FPRP_MOUSE	Prostaglandin F2 receptor negative regulator (CD9 partner 1) (CD9P-1) (Glu-Trp-Ile EWI motif-containing protein F) (EWI-F) (Prostaglandin F2-alpha receptor regulatory protein) (Prostaglandin F2-alpha receptor-associated protein) (CD antigen CD315)	Ptgfrn	1	0.762199	1.09341	0	lipid droplet organization [GO:0034389]; myoblast fusion involved in skeletal muscle regeneration [GO:0014905]	endoplasmic reticulum membrane [GO:0005789]; Golgi apparatus [GO:0005794]	endoplasmic reticulum membrane [GO:0005789]; Golgi apparatus [GO:0005794]; lipid droplet organization [GO:0034389]; myoblast fusion involved in skeletal muscle regeneration [GO:0014905]		SUBCELLULAR LOCATION: Endoplasmic reticulum membrane {ECO:0000250}; Single-pass type I membrane protein {ECO:0000250}. Golgi apparatus, trans-Golgi network membrane {ECO:0000250}; Single-pass type I membrane protein {ECO:0000250}.	0	0	2	3	2	2
P42669	PURA_MOUSE	Transcriptional activator protein Pur-alpha (Purine-rich single-stranded DNA-binding protein alpha)	Pura	0	0.748911	1.69135	0	cell population proliferation [GO:0008283]; dendritic transport of messenger ribonucleoprotein complex [GO:0098963]; DNA unwinding involved in DNA replication [GO:0006268]; epithelial cell proliferation [GO:0050673]; lymphocyte proliferation [GO:0046651]; negative regulation of DNA-binding transcription factor activity [GO:0043433]; negative regulation of DNA-templated transcription [GO:0045892];…	cytoplasm [GO:0005737]; dendrite [GO:0030425]; dendrite cytoplasm [GO:0032839]; glutamatergic synapse [GO:0098978]; neuronal cell body [GO:0043025]; nucleus [GO:0005634]; postsynapse [GO:0098794]; postsynaptic density [GO:0014069]	cytoplasm [GO:0005737]; dendrite [GO:0030425]; dendrite cytoplasm [GO:0032839]; glutamatergic synapse [GO:0098978]; neuronal cell body [GO:0043025]; nucleus [GO:0005634]; postsynapse [GO:0098794]; postsynaptic density [GO:0014069]; DNA binding [GO:0003677]; DNA-binding transcription factor activity [GO:0003700]; DNA-binding transcription factor activity, RNA polymerase II-specific [GO:0000981]; D…	DNA binding [GO:0003677]; DNA-binding transcription factor activity [GO:0003700]; DNA-binding transcription factor activity, RNA polymerase II-specific [GO:0000981]; DNA-binding transcription factor binding [GO:0140297]; double-stranded DNA binding [GO:0003690]; double-stranded telomeric DNA binding [GO:0003691]; mRNA regulatory element binding translation repressor activity [GO:0000900]; purine-…	SUBCELLULAR LOCATION: Nucleus.	2	0	1	1	2	4
O35295	PURB_MOUSE	Transcriptional regulator protein Pur-beta (Purine-rich element-binding protein B) (Vascular actin single-stranded DNA-binding factor 2 p44 component)	Purb	0	0.657748	0.872052	0	DNA unwinding involved in DNA replication [GO:0006268]; negative regulation of DNA-templated transcription [GO:0045892]; negative regulation of transcription by RNA polymerase II [GO:0000122]; positive regulation of transcription by RNA polymerase II [GO:0045944]; regulation of transcription by RNA polymerase II [GO:0006357]	nucleoplasm [GO:0005654]; nucleus [GO:0005634]	nucleoplasm [GO:0005654]; nucleus [GO:0005634]; DNA-binding transcription factor activity [GO:0003700]; DNA-binding transcription factor activity, RNA polymerase II-specific [GO:0000981]; DNA-binding transcription factor binding [GO:0140297]; DNA-binding transcription repressor activity, RNA polymerase II-specific [GO:0001227]; double-stranded DNA binding [GO:0003690]; double-stranded telomeric D…	DNA-binding transcription factor activity [GO:0003700]; DNA-binding transcription factor activity, RNA polymerase II-specific [GO:0000981]; DNA-binding transcription factor binding [GO:0140297]; DNA-binding transcription repressor activity, RNA polymerase II-specific [GO:0001227]; double-stranded DNA binding [GO:0003690]; double-stranded telomeric DNA binding [GO:0003691]; mRNA binding [GO:000372…	SUBCELLULAR LOCATION: Nucleus {ECO:0000269|PubMed:33743134}.	2	1	0	1	1	1
Q3U4I7	PYRD2_MOUSE	Pyridine nucleotide-disulfide oxidoreductase domain-containing protein 2 (EC 1.-.-.-)	Pyroxd2	0	0.270227	0.114348	0	mitochondrion organization [GO:0007005]	mitochondrial matrix [GO:0005759]	mitochondrial matrix [GO:0005759]; oxidoreductase activity [GO:0016491]; mitochondrion organization [GO:0007005]	oxidoreductase activity [GO:0016491]	SUBCELLULAR LOCATION: Mitochondrion matrix {ECO:0000250|UniProtKB:Q8N2H3}. Note=The import into mitochondria is dependent on TOMM40 and TIMM23. {ECO:0000250|UniProtKB:Q8N2H3}.	7	4	5	7	6	4
A2AFJ1	A2AFJ1_MOUSE	Histone-binding protein RBBP7 (Nucleosome-remodeling factor subunit RBAP46) (Retinoblastoma-binding protein 7)	Rbbp7	0	0.912155	1.22975	0	DNA replication [GO:0006260]	nucleus [GO:0005634]	nucleus [GO:0005634]; DNA replication [GO:0006260]		SUBCELLULAR LOCATION: Nucleus {ECO:0000256|ARBA:ARBA00004123}.	0	0	3	1	1	1
Q9CWZ3	RBM8A_MOUSE	RNA-binding protein 8A (RNA-binding motif protein 8A) (Ribonucleoprotein RBM8A)	Rbm8a	0	0.263434	0.145711	0	mRNA export from nucleus [GO:0006406]; mRNA splicing, via spliceosome [GO:0000398]; nuclear-transcribed mRNA catabolic process, nonsense-mediated decay [GO:0000184]; regulation of alternative mRNA splicing, via spliceosome [GO:0000381]; regulation of mRNA processing [GO:0050684]; regulation of nuclear-transcribed mRNA catabolic process, nonsense-mediated decay [GO:2000622]; regulation of translat…	catalytic step 2 spliceosome [GO:0071013]; cytosol [GO:0005829]; dendrite [GO:0030425]; exon-exon junction complex [GO:0035145]; exon-exon junction subcomplex mago-y14 [GO:1990501]; neuronal cell body [GO:0043025]; nuclear speck [GO:0016607]; nucleus [GO:0005634]; U2-type catalytic step 1 spliceosome [GO:0071006]	catalytic step 2 spliceosome [GO:0071013]; cytosol [GO:0005829]; dendrite [GO:0030425]; exon-exon junction complex [GO:0035145]; exon-exon junction subcomplex mago-y14 [GO:1990501]; neuronal cell body [GO:0043025]; nuclear speck [GO:0016607]; nucleus [GO:0005634]; U2-type catalytic step 1 spliceosome [GO:0071006]; mRNA binding [GO:0003729]; mRNA export from nucleus [GO:0006406]; mRNA splicing, vi…	mRNA binding [GO:0003729]	SUBCELLULAR LOCATION: Nucleus {ECO:0000250|UniProtKB:Q9Y5S9}. Nucleus speckle {ECO:0000250|UniProtKB:Q9Y5S9}. Cytoplasm {ECO:0000250|UniProtKB:Q9Y5S9}. Note=Nucleocytoplasmic shuttling protein. Travels to the cytoplasm as part of the exon junction complex (EJC) bound to mRNA. Colocalizes with the core EJC, ALYREF/THOC4, NXF1 and UAP56 in the nucleus and nuclear speckles. {ECO:0000250|UniProtKB:Q9…	1	1	2	2	2	2
Q9JM62	REEP6_MOUSE	Receptor expression-enhancing protein 6 (Polyposis locus protein 1-like 1) (TB2 protein-like 1)	Reep6	2	1.31594	0.42222	0	detection of light stimulus involved in visual perception [GO:0050908]; regulation of intracellular transport [GO:0032386]	apical part of cell [GO:0045177]; clathrin-coated vesicle membrane [GO:0030665]; endoplasmic reticulum [GO:0005783]; endoplasmic reticulum membrane [GO:0005789]; photoreceptor inner segment [GO:0001917]; rod spherule [GO:0044317]	apical part of cell [GO:0045177]; clathrin-coated vesicle membrane [GO:0030665]; endoplasmic reticulum [GO:0005783]; endoplasmic reticulum membrane [GO:0005789]; photoreceptor inner segment [GO:0001917]; rod spherule [GO:0044317]; detection of light stimulus involved in visual perception [GO:0050908]; regulation of intracellular transport [GO:0032386]		SUBCELLULAR LOCATION: Endoplasmic reticulum membrane {ECO:0000269|PubMed:24098485, ECO:0000269|PubMed:28475715}; Multi-pass membrane protein {ECO:0000255}. Cytoplasmic vesicle, clathrin-coated vesicle membrane {ECO:0000269|PubMed:28369466}; Multi-pass membrane protein {ECO:0000255}.	4	4	4	4	4	4
A0A0A6YXF6	A0A0A6YXF6_MOUSE	Transforming protein RhoA	Rhoa	0	1.82292	1.02184	0	small GTPase mediated signal transduction [GO:0007264]	cleavage furrow [GO:0032154]	cleavage furrow [GO:0032154]; GTP binding [GO:0005525]; GTPase activity [GO:0003924]; small GTPase mediated signal transduction [GO:0007264]	GTP binding [GO:0005525]; GTPase activity [GO:0003924]	SUBCELLULAR LOCATION: Cell projection, lamellipodium {ECO:0000256|ARBA:ARBA00004510}. Cleavage furrow {ECO:0000256|ARBA:ARBA00004626}. Membrane {ECO:0000256|ARBA:ARBA00004423}; Lipid-anchor {ECO:0000256|ARBA:ARBA00004423}; Cytoplasmic side {ECO:0000256|ARBA:ARBA00004423}.	4	4	4	3	6	3
P14206	RSSA_MOUSE	Small ribosomal subunit protein uS2 (37 kDa laminin receptor precursor) (37LRP) (37 kDa oncofetal antigen) (37/67 kDa laminin receptor) (LRP/LR) (40S ribosomal protein SA) (67 kDa laminin receptor) (67LR) (Laminin receptor 1) (LamR) (Laminin-binding protein precursor p40) (LBP/p40) (OFA/iLRP)	Rpsa	0	0.930124	0.513389	0	cell-cell adhesion [GO:0098609]; cytoplasmic translation [GO:0002181]; ribosomal small subunit assembly [GO:0000028]	basement membrane [GO:0005604]; collagen-containing extracellular matrix [GO:0062023]; cytoplasm [GO:0005737]; cytosol [GO:0005829]; cytosolic ribosome [GO:0022626]; cytosolic small ribosomal subunit [GO:0022627]; glutamatergic synapse [GO:0098978]; membrane [GO:0016020]; neuronal cell body [GO:0043025]; nucleus [GO:0005634]; plasma membrane [GO:0005886]; postsynapse [GO:0098794]; ribosome [GO:00…	basement membrane [GO:0005604]; collagen-containing extracellular matrix [GO:0062023]; cytoplasm [GO:0005737]; cytosol [GO:0005829]; cytosolic ribosome [GO:0022626]; cytosolic small ribosomal subunit [GO:0022627]; glutamatergic synapse [GO:0098978]; membrane [GO:0016020]; neuronal cell body [GO:0043025]; nucleus [GO:0005634]; plasma membrane [GO:0005886]; postsynapse [GO:0098794]; ribosome [GO:00…	laminin binding [GO:0043236]; laminin receptor activity [GO:0005055]; ribosome binding [GO:0043022]; structural constituent of ribosome [GO:0003735]	SUBCELLULAR LOCATION: Cell membrane. Cytoplasm {ECO:0000269|PubMed:36517592}. Nucleus. Note=67LR is found at the surface of the plasma membrane, with its C-terminal laminin-binding domain accessible to extracellular ligands. 37LRP is found at the cell surface, in the cytoplasm and in the nucleus. Colocalizes with PPP1R16B in the cell membrane (By similarity). 37LRP shuttles to the nucleus upon mi…	3	4	2	4	4	3
Q80X95	RRAGA_MOUSE	Ras-related GTP-binding protein A (Rag A) (RagA) (EC 3.6.5.-)	Rraga	0	0.797913	0.436281	0	apoptotic process [GO:0006915]; cellular response to amino acid starvation [GO:0034198]; cellular response to amino acid stimulus [GO:0071230]; cellular response to nutrient levels [GO:0031669]; cellular response to starvation [GO:0009267]; glucose homeostasis [GO:0042593]; intracellular signal transduction [GO:0035556]; negative regulation of autophagy [GO:0010507]; positive regulation of TOR si…	cytoplasm [GO:0005737]; FNIP-folliculin RagC/D GAP [GO:1990877]; GATOR1 complex [GO:1990130]; Gtr1-Gtr2 GTPase complex [GO:1990131]; lysosomal membrane [GO:0005765]; lysosome [GO:0005764]; nucleoplasm [GO:0005654]; nucleus [GO:0005634]	cytoplasm [GO:0005737]; FNIP-folliculin RagC/D GAP [GO:1990877]; GATOR1 complex [GO:1990130]; Gtr1-Gtr2 GTPase complex [GO:1990131]; lysosomal membrane [GO:0005765]; lysosome [GO:0005764]; nucleoplasm [GO:0005654]; nucleus [GO:0005634]; GTP binding [GO:0005525]; GTPase activity [GO:0003924]; phosphoprotein binding [GO:0051219]; protein heterodimerization activity [GO:0046982]; protein homodimeriz…	GTP binding [GO:0005525]; GTPase activity [GO:0003924]; phosphoprotein binding [GO:0051219]; protein heterodimerization activity [GO:0046982]; protein homodimerization activity [GO:0042803]; protein-membrane adaptor activity [GO:0043495]; ubiquitin protein ligase binding [GO:0031625]	SUBCELLULAR LOCATION: Cytoplasm {ECO:0000250|UniProtKB:Q7L523}. Nucleus {ECO:0000250|UniProtKB:Q7L523}. Lysosome membrane {ECO:0000250|UniProtKB:Q7L523}. Note=Predominantly cytoplasmic. Recruited to the lysosome surface by the Ragulator complex. May shuttle between the cytoplasm and nucleus, depending on the bound nucleotide state. {ECO:0000250|UniProtKB:Q7L523}.	1	1	1	1	2	1
B1AWT2	B1AWT2_MOUSE	Ras-related GTP-binding protein	Rragd	0	1.84077	1.52872	0	cellular response to amino acid stimulus [GO:0071230]; positive regulation of TOR signaling [GO:0032008]	lysosome [GO:0005764]	lysosome [GO:0005764]; GTP binding [GO:0005525]; cellular response to amino acid stimulus [GO:0071230]; positive regulation of TOR signaling [GO:0032008]	GTP binding [GO:0005525]	SUBCELLULAR LOCATION: Cytoplasm {ECO:0000256|RuleBase:RU367014}. Lysosome {ECO:0000256|RuleBase:RU367014}.	0	0	0	2	2	2
A2AVJ7	A2AVJ7_MOUSE	Ribosome binding protein 1	Rrbp1	1	0.896011	0.398929	0	protein transport [GO:0015031]	endoplasmic reticulum membrane [GO:0005789]	endoplasmic reticulum membrane [GO:0005789]; protein transport [GO:0015031]			15	15	18	21	23	22
Q61112	CAB45_MOUSE	45 kDa calcium-binding protein (Cab45) (Stromal cell-derived factor 4) (SDF-4)	Sdf4	0	0.944345	0.537714	0	calcium-ion regulated exocytosis [GO:0017156]; cerebellum development [GO:0021549]; fat cell differentiation [GO:0045444]; maintenance of synapse structure [GO:0099558]; response to ethanol [GO:0045471]; UV protection [GO:0009650]; zymogen granule exocytosis [GO:0070625]	cytoplasm [GO:0005737]; endoplasmic reticulum [GO:0005783]; Golgi lumen [GO:0005796]; late endosome [GO:0005770]	cytoplasm [GO:0005737]; endoplasmic reticulum [GO:0005783]; Golgi lumen [GO:0005796]; late endosome [GO:0005770]; calcium ion binding [GO:0005509]; identical protein binding [GO:0042802]; calcium-ion regulated exocytosis [GO:0017156]; cerebellum development [GO:0021549]; fat cell differentiation [GO:0045444]; maintenance of synapse structure [GO:0099558]; response to ethanol [GO:0045471]; UV prot…	calcium ion binding [GO:0005509]; identical protein binding [GO:0042802]	SUBCELLULAR LOCATION: Golgi apparatus lumen {ECO:0000269|PubMed:16608874}.	1	1	1	1	2	2
O08547	SC22B_MOUSE	Vesicle-trafficking protein SEC22b (ER-Golgi SNARE of 24 kDa) (ERS-24) (ERS24) (SEC22 vesicle-trafficking protein homolog B) (SEC22 vesicle-trafficking protein-like 1) (mSec22b)	Sec22b	1	1.61109	1.45808	0	endoplasmic reticulum to Golgi vesicle-mediated transport [GO:0006888]; negative regulation of autophagosome assembly [GO:1902902]; positive regulation of protein catabolic process [GO:0045732]; protein transport [GO:0015031]; retrograde vesicle-mediated transport, Golgi to endoplasmic reticulum [GO:0006890]; vesicle fusion with Golgi apparatus [GO:0048280]; vesicle-mediated transport [GO:0016192]	COPI-coated vesicle [GO:0030137]; endoplasmic reticulum membrane [GO:0005789]; endoplasmic reticulum-Golgi intermediate compartment [GO:0005793]; endoplasmic reticulum-Golgi intermediate compartment membrane [GO:0033116]; ER to Golgi transport vesicle membrane [GO:0012507]; Golgi membrane [GO:0000139]; melanosome [GO:0042470]; SNARE complex [GO:0031201]; synaptic vesicle [GO:0008021]	COPI-coated vesicle [GO:0030137]; endoplasmic reticulum membrane [GO:0005789]; endoplasmic reticulum-Golgi intermediate compartment [GO:0005793]; endoplasmic reticulum-Golgi intermediate compartment membrane [GO:0033116]; ER to Golgi transport vesicle membrane [GO:0012507]; Golgi membrane [GO:0000139]; melanosome [GO:0042470]; SNARE complex [GO:0031201]; synaptic vesicle [GO:0008021]; SNAP recept…	SNAP receptor activity [GO:0005484]; syntaxin binding [GO:0019905]	SUBCELLULAR LOCATION: Endoplasmic reticulum membrane {ECO:0000250|UniProtKB:Q4KM74}; Single-pass type IV membrane protein {ECO:0000250|UniProtKB:Q4KM74}. Endoplasmic reticulum-Golgi intermediate compartment membrane {ECO:0000250|UniProtKB:Q4KM74}. Golgi apparatus, cis-Golgi network membrane {ECO:0000250|UniProtKB:Q4KM74}. Golgi apparatus, trans-Golgi network membrane {ECO:0000250|UniProtKB:Q4KM74…	1	2	1	1	1	2
P17563	SBP1_MOUSE	Methanethiol oxidase (MTO) (EC 1.8.3.4) (56 kDa selenium-binding protein) (SBP56) (SP56) (Selenium-binding protein 1)	Selenbp1	0	1.10947	0.322829	0	brown fat cell differentiation [GO:0050873]; protein transport [GO:0015031]	cytosol [GO:0005829]; fibrillar center [GO:0001650]; membrane [GO:0016020]; nucleolus [GO:0005730]	cytosol [GO:0005829]; fibrillar center [GO:0001650]; membrane [GO:0016020]; nucleolus [GO:0005730]; methanethiol oxidase activity [GO:0018549]; selenium binding [GO:0008430]; brown fat cell differentiation [GO:0050873]; protein transport [GO:0015031]	methanethiol oxidase activity [GO:0018549]; selenium binding [GO:0008430]	SUBCELLULAR LOCATION: Nucleus {ECO:0000250|UniProtKB:Q13228}. Cytoplasm, cytosol {ECO:0000250|UniProtKB:Q13228}. Membrane {ECO:0000250|UniProtKB:Q8VIF7}; Peripheral membrane protein {ECO:0000250|UniProtKB:Q8VIF7}. Note=May associate with Golgi membrane (By similarity). May associate with the membrane of autophagosomes (By similarity). {ECO:0000250|UniProtKB:Q8VIF7}.	18	18	19	17	15	14
Q8BJU0	SGTA_MOUSE	Small glutamine-rich tetratricopeptide repeat-containing protein alpha (Alpha-SGT)	Sgta	0	0.0855251	0.0552254	0	chaperone-mediated protein folding [GO:0061077]; negative regulation of ER-associated ubiquitin-dependent protein catabolic process [GO:1903070]; negative regulation of ubiquitin-dependent protein catabolic process [GO:2000059]; positive regulation of ER-associated ubiquitin-dependent protein catabolic process [GO:1903071]; post-translational protein targeting to endoplasmic reticulum membrane [G…	cytoplasm [GO:0005737]; cytosol [GO:0005829]; extrinsic component of synaptic vesicle membrane [GO:0098850]; membrane [GO:0016020]; nucleus [GO:0005634]; presynapse [GO:0098793]; TRC complex [GO:0072380]	cytoplasm [GO:0005737]; cytosol [GO:0005829]; extrinsic component of synaptic vesicle membrane [GO:0098850]; membrane [GO:0016020]; nucleus [GO:0005634]; presynapse [GO:0098793]; TRC complex [GO:0072380]; BAT3 complex binding [GO:1904288]; identical protein binding [GO:0042802]; molecular adaptor activity [GO:0060090]; protein heterodimerization activity [GO:0046982]; protein homodimerization act…	BAT3 complex binding [GO:1904288]; identical protein binding [GO:0042802]; molecular adaptor activity [GO:0060090]; protein heterodimerization activity [GO:0046982]; protein homodimerization activity [GO:0042803]; protein self-association [GO:0043621]	SUBCELLULAR LOCATION: Cytoplasm {ECO:0000250|UniProtKB:O43765}. Nucleus {ECO:0000250|UniProtKB:O43765}. Note=Co-localizes with HSP90AB1 in the cytoplasm. Increased nuclear accumulation seen during cell apoptosis. {ECO:0000250|UniProtKB:O43765}.	3	3	3	2	1	2
Q9CXK4	SWET1_MOUSE	Sugar transporter SWEET1 (MmSWEET1) (RAG1-activating protein 1) (Solute carrier family 50 member 1)	Slc50a1	7	1.84233	4.09705	0	carbohydrate transport [GO:0008643]	endomembrane system [GO:0012505]; Golgi apparatus [GO:0005794]; Golgi membrane [GO:0000139]; plasma membrane [GO:0005886]	endomembrane system [GO:0012505]; Golgi apparatus [GO:0005794]; Golgi membrane [GO:0000139]; plasma membrane [GO:0005886]; glucoside transmembrane transporter activity [GO:0042947]; sugar transmembrane transporter activity [GO:0051119]; carbohydrate transport [GO:0008643]	glucoside transmembrane transporter activity [GO:0042947]; sugar transmembrane transporter activity [GO:0051119]	SUBCELLULAR LOCATION: Golgi apparatus membrane {ECO:0000250}; Multi-pass membrane protein {ECO:0000250}. Cell membrane {ECO:0000250}; Multi-pass membrane protein {ECO:0000250}. Note=May also localize to the endoplasmic reticulum. {ECO:0000250}.	2	3	7	11	16	15
O88811	STAM2_MOUSE	Signal transducing adapter molecule 2 (STAM-2) (Hrs-binding protein)	Stam2	0	0.251585	0.203088	0	protein transport [GO:0015031]; signal transduction [GO:0007165]	cytoplasm [GO:0005737]; cytosol [GO:0005829]; early endosome membrane [GO:0031901]; endocytic vesicle [GO:0030139]; intracellular membrane-bounded organelle [GO:0043231]; nucleoplasm [GO:0005654]	cytoplasm [GO:0005737]; cytosol [GO:0005829]; early endosome membrane [GO:0031901]; endocytic vesicle [GO:0030139]; intracellular membrane-bounded organelle [GO:0043231]; nucleoplasm [GO:0005654]; phosphatidylinositol binding [GO:0035091]; ubiquitin binding [GO:0043130]; protein transport [GO:0015031]; signal transduction [GO:0007165]	phosphatidylinositol binding [GO:0035091]; ubiquitin binding [GO:0043130]	SUBCELLULAR LOCATION: Cytoplasm {ECO:0000269|PubMed:10651905, ECO:0000269|PubMed:12551915}. Early endosome membrane {ECO:0000250}; Peripheral membrane protein {ECO:0000250}; Cytoplasmic side {ECO:0000250}.	18	16	17	16	16	16
Q8C7E7	STBD1_MOUSE	Starch-binding domain-containing protein 1 (Genethonin-1) (Glycophagy cargo receptor stbd1)	Stbd1	0	1.5532	0.897285	0	glycogen catabolic process [GO:0005980]; glycophagy [GO:0061723]; intracellular transport [GO:0046907]; substrate localization to autophagosome [GO:0061753]	endoplasmic reticulum [GO:0005783]; endoplasmic reticulum membrane [GO:0005789]; membrane [GO:0016020]; perinuclear region of cytoplasm [GO:0048471]; phagophore assembly site membrane [GO:0034045]; plasma membrane [GO:0005886]; T-tubule [GO:0030315]	endoplasmic reticulum [GO:0005783]; endoplasmic reticulum membrane [GO:0005789]; membrane [GO:0016020]; perinuclear region of cytoplasm [GO:0048471]; phagophore assembly site membrane [GO:0034045]; plasma membrane [GO:0005886]; T-tubule [GO:0030315]; cargo receptor activity [GO:0038024]; enzyme binding [GO:0019899]; glycogen binding [GO:2001069]; polysaccharide binding [GO:0030247]; starch bindin…	cargo receptor activity [GO:0038024]; enzyme binding [GO:0019899]; glycogen binding [GO:2001069]; polysaccharide binding [GO:0030247]; starch binding [GO:2001070]	SUBCELLULAR LOCATION: Preautophagosomal structure membrane {ECO:0000250|UniProtKB:Q5FVN1, ECO:0000305|PubMed:20810658}; Single-pass type III membrane protein {ECO:0000250|UniProtKB:O95210}. Endoplasmic reticulum membrane {ECO:0000250|UniProtKB:O95210}; Single-pass type III membrane protein {ECO:0000250|UniProtKB:O95210}. Cell membrane, sarcolemma, T-tubule {ECO:0000250|UniProtKB:O95210}. Note=Als…	3	2	3	4	3	4
Q60864	STIP1_MOUSE	Stress-induced-phosphoprotein 1 (STI1) (mSTI1) (Hsc70/Hsp90-organizing protein) (Hop)	Stip1	0	1.96763	0.572952	0	cellular response to interleukin-7 [GO:0098761]	cytosol [GO:0005829]; dynein axonemal particle [GO:0120293]; myelin sheath [GO:0043209]; nucleus [GO:0005634]; protein folding chaperone complex [GO:0101031]; protein-containing complex [GO:0032991]	cytosol [GO:0005829]; dynein axonemal particle [GO:0120293]; myelin sheath [GO:0043209]; nucleus [GO:0005634]; protein folding chaperone complex [GO:0101031]; protein-containing complex [GO:0032991]; Hsp70 protein binding [GO:0030544]; Hsp90 protein binding [GO:0051879]; protein-folding chaperone binding [GO:0051087]; cellular response to interleukin-7 [GO:0098761]	Hsp70 protein binding [GO:0030544]; Hsp90 protein binding [GO:0051879]; protein-folding chaperone binding [GO:0051087]	SUBCELLULAR LOCATION: Cytoplasm {ECO:0000269|PubMed:8999875}. Nucleus {ECO:0000269|PubMed:8999875}. Dynein axonemal particle {ECO:0000250|UniProtKB:Q7ZWU1}.	20	20	17	13	15	14
Q9DBN1	STR6L_MOUSE	Stimulated by retinoic acid gene 6 protein-like (STRA6-like protein) (Retinol-binding protein 4 receptor 2) (RBP4 receptor 2)	Stra6l	11	1.40069	0.396059	0	establishment of localization in cell [GO:0051649]; retinol transport [GO:0034633]; vitamin A import into cell [GO:0071939]	plasma membrane [GO:0005886]	plasma membrane [GO:0005886]; retinol transmembrane transporter activity [GO:0034632]; signaling receptor activity [GO:0038023]; establishment of localization in cell [GO:0051649]; retinol transport [GO:0034633]; vitamin A import into cell [GO:0071939]	retinol transmembrane transporter activity [GO:0034632]; signaling receptor activity [GO:0038023]	SUBCELLULAR LOCATION: Cell membrane {ECO:0000269|PubMed:23105095}; Multi-pass membrane protein {ECO:0000255}.	1	1	2	1	1	1
Q9Z1Z2	STRAP_MOUSE	Serine-threonine kinase receptor-associated protein (UNR-interacting protein)	Strap	0	0.0366157	-0.0617498	0	alternative mRNA splicing, via spliceosome [GO:0000380]; anatomical structure development [GO:0048856]; maintenance of gastrointestinal epithelium [GO:0030277]; negative regulation of transcription by RNA polymerase II [GO:0000122]; negative regulation of transforming growth factor beta receptor signaling pathway [GO:0030512]; neuron differentiation [GO:0030182]; protein-RNA complex assembly [GO:…	cytoplasm [GO:0005737]; cytosol [GO:0005829]; nucleus [GO:0005634]; SMN complex [GO:0032797]; SMN-Sm protein complex [GO:0034719]	cytoplasm [GO:0005737]; cytosol [GO:0005829]; nucleus [GO:0005634]; SMN complex [GO:0032797]; SMN-Sm protein complex [GO:0034719]; mRNA binding [GO:0003729]; RNA binding [GO:0003723]; signaling receptor binding [GO:0005102]; U2 snRNP binding [GO:1990447]; alternative mRNA splicing, via spliceosome [GO:0000380]; anatomical structure development [GO:0048856]; maintenance of gastrointestinal epithel…	mRNA binding [GO:0003729]; RNA binding [GO:0003723]; signaling receptor binding [GO:0005102]; U2 snRNP binding [GO:1990447]	SUBCELLULAR LOCATION: Cytoplasm {ECO:0000250}. Nucleus {ECO:0000250}. Note=Localized predominantly in the cytoplasm but also found in the nucleus. {ECO:0000250}.	1	2	4	3	2	2
Q9DBX3	SUSD2_MOUSE	Sushi domain-containing protein 2	Susd2	1	0.910774	0.772387	0	negative regulation of cell cycle G1/S phase transition [GO:1902807]; negative regulation of cell division [GO:0051782]	extracellular space [GO:0005615]; plasma membrane [GO:0005886]	extracellular space [GO:0005615]; plasma membrane [GO:0005886]; negative regulation of cell cycle G1/S phase transition [GO:1902807]; negative regulation of cell division [GO:0051782]		SUBCELLULAR LOCATION: Cell membrane {ECO:0000250|UniProtKB:Q9UGT4}; Single-pass type I membrane protein {ECO:0000305}.	4	4	3	2	3	3
A0A0R4J259	A0A0R4J259_MOUSE	Synaptotagmin binding, cytoplasmic RNA interacting protein	Syncrip	0	2.38019	1.5882	0		cytoplasm [GO:0005737]	cytoplasm [GO:0005737]; RNA binding [GO:0003723]	RNA binding [GO:0003723]	SUBCELLULAR LOCATION: Cytoplasm {ECO:0000256|ARBA:ARBA00004496}.	5	7	6	9	9	7
Q6ZWR6	SYNE1_MOUSE	Nesprin-1 (Enaptin) (KASH domain-containing protein 1) (KASH1) (Myocyte nuclear envelope protein 1) (Myne-1) (Nuclear envelope spectrin repeat protein 1) (Synaptic nuclear envelope protein 1) (Syne-1)	Syne1	1	1.91369	1.15547	0	centrosome localization [GO:0051642]; Golgi organization [GO:0007030]; muscle cell differentiation [GO:0042692]; nuclear matrix anchoring at nuclear membrane [GO:0090292]; nuclear migration [GO:0007097]; regulation of cilium assembly [GO:1902017]; spermatogenesis [GO:0007283]	cytoplasm [GO:0005737]; cytoskeleton [GO:0005856]; Golgi apparatus [GO:0005794]; meiotic nuclear membrane microtubule tethering complex [GO:0034993]; membrane [GO:0016020]; nuclear envelope [GO:0005635]; nuclear membrane [GO:0031965]; nuclear outer membrane [GO:0005640]; nucleolus [GO:0005730]; nucleoplasm [GO:0005654]; P-body [GO:0000932]; postsynaptic membrane [GO:0045211]; sarcomere [GO:003001…	cytoplasm [GO:0005737]; cytoskeleton [GO:0005856]; Golgi apparatus [GO:0005794]; meiotic nuclear membrane microtubule tethering complex [GO:0034993]; membrane [GO:0016020]; nuclear envelope [GO:0005635]; nuclear membrane [GO:0031965]; nuclear outer membrane [GO:0005640]; nucleolus [GO:0005730]; nucleoplasm [GO:0005654]; P-body [GO:0000932]; postsynaptic membrane [GO:0045211]; sarcomere [GO:003001…	actin binding [GO:0003779]; actin filament binding [GO:0051015]; cytoskeleton-nuclear membrane anchor activity [GO:0140444]; enzyme binding [GO:0019899]; identical protein binding [GO:0042802]; lamin binding [GO:0005521]; protein homodimerization activity [GO:0042803]	SUBCELLULAR LOCATION: Nucleus outer membrane {ECO:0000305}; Single-pass type IV membrane protein {ECO:0000305}; Cytoplasmic side {ECO:0000305}. Nucleus. Nucleus envelope. Cytoplasm, cytoskeleton. Cytoplasm, myofibril, sarcomere {ECO:0000250}. Note=The largest part of the protein is cytoplasmic, while its C-terminal part is associated with the nuclear envelope, most probably the outer nuclear memb…	3	4	2	2	3	3
Q9D6K5	SYJ2B_MOUSE	Synaptojanin-2-binding protein (Activin receptor-interacting protein 2) (Activin receptor-interacting protein 4) (Mitochondrial outer membrane protein 25)	Synj2bp	1	0.0902221	0.0660597	0	cytoplasm organization [GO:0007028]; endocytosis [GO:0006897]; intracellular distribution of mitochondria [GO:0048312]; negative regulation of activin receptor signaling pathway [GO:0032926]; negative regulation of angiogenesis [GO:0016525]; negative regulation of endothelial cell migration [GO:0010596]; negative regulation of endothelial cell proliferation [GO:0001937]; negative regulation of ER…	cell surface [GO:0009986]; mitochondrial outer membrane [GO:0005741]; mitochondrion [GO:0005739]; perinuclear region of cytoplasm [GO:0048471]	cell surface [GO:0009986]; mitochondrial outer membrane [GO:0005741]; mitochondrion [GO:0005739]; perinuclear region of cytoplasm [GO:0048471]; type II activin receptor binding [GO:0070699]; cytoplasm organization [GO:0007028]; endocytosis [GO:0006897]; intracellular distribution of mitochondria [GO:0048312]; negative regulation of activin receptor signaling pathway [GO:0032926]; negative regulat…	type II activin receptor binding [GO:0070699]	SUBCELLULAR LOCATION: Mitochondrion outer membrane {ECO:0000250|UniProtKB:Q9WVJ4}; Single-pass type IV membrane protein {ECO:0000250|UniProtKB:Q9WVJ4}; Cytoplasmic side {ECO:0000250|UniProtKB:Q9WVJ4}. Cytoplasm, perinuclear region {ECO:0000269|PubMed:11882656}.	4	4	4	6	5	5
Q3TCU5	Q3TCU5_MOUSE	Tapasin (TAP-binding protein)	Tapbp	1	0.560129	-0.378283	0	antigen processing and presentation of endogenous peptide antigen via MHC class I [GO:0019885]; MHC class Ib protein complex assembly [GO:0002398]; peptide antigen assembly with MHC class I protein complex [GO:0002502]; regulation of gene expression [GO:0010468]; regulation of protein complex stability [GO:0061635]	Golgi membrane [GO:0000139]; Tapasin-ERp57 complex [GO:0061779]	Golgi membrane [GO:0000139]; Tapasin-ERp57 complex [GO:0061779]; molecular adaptor activity [GO:0060090]; protein folding chaperone [GO:0044183]; TAP complex binding [GO:0062061]; TAP1 binding [GO:0046978]; TAP2 binding [GO:0046979]; antigen processing and presentation of endogenous peptide antigen via MHC class I [GO:0019885]; MHC class Ib protein complex assembly [GO:0002398]; peptide antigen a…	molecular adaptor activity [GO:0060090]; protein folding chaperone [GO:0044183]; TAP complex binding [GO:0062061]; TAP1 binding [GO:0046978]; TAP2 binding [GO:0046979]	SUBCELLULAR LOCATION: Membrane {ECO:0000256|ARBA:ARBA00004479}; Single-pass type I membrane protein {ECO:0000256|ARBA:ARBA00004479}.	2	3	3	3	4	3
Q8VD31	TPSNR_MOUSE	Tapasin-related protein (TAPASIN-R) (TAP-binding protein-like) (TAP-binding protein-related protein) (TAPBP-R) (Tapasin-like)	Tapbpl	1	1.24522	0.596951	0	negative regulation of antigen processing and presentation of peptide antigen via MHC class I [GO:0002590]; peptide antigen assembly with MHC class I protein complex [GO:0002502]	endoplasmic reticulum [GO:0005783]; Golgi membrane [GO:0000139]; MHC class I peptide loading complex [GO:0042824]; plasma membrane [GO:0005886]	endoplasmic reticulum [GO:0005783]; Golgi membrane [GO:0000139]; MHC class I peptide loading complex [GO:0042824]; plasma membrane [GO:0005886]; MHC class I protein complex binding [GO:0023024]; TAP complex binding [GO:0062061]; negative regulation of antigen processing and presentation of peptide antigen via MHC class I [GO:0002590]; peptide antigen assembly with MHC class I protein complex [GO:…	MHC class I protein complex binding [GO:0023024]; TAP complex binding [GO:0062061]	SUBCELLULAR LOCATION: Cell membrane {ECO:0000250|UniProtKB:Q9BX59}; Single-pass type I membrane protein {ECO:0000250}. Endoplasmic reticulum membrane {ECO:0000250|UniProtKB:Q9BX59}; Single-pass type I membrane protein {ECO:0000250}. Microsome membrane {ECO:0000250|UniProtKB:Q9BX59}; Single-pass type I membrane protein {ECO:0000250|UniProtKB:Q9BX59}. Golgi apparatus membrane {ECO:0000250|UniProtKB…	1	1	1	2	3	1
Q91YM4	FAKD4_MOUSE	FAST kinase domain-containing protein 4 (Protein TBRG4) (Transforming growth factor beta regulator 4)	Tbrg4	0	2.38774	1.40303	0	mitochondrial mRNA processing [GO:0090615]; mitochondrial RNA processing [GO:0000963]; mRNA metabolic process [GO:0016071]; regulation of mitochondrial mRNA stability [GO:0044528]	mitochondrial matrix [GO:0005759]; mitochondrion [GO:0005739]; ribonucleoprotein granule [GO:0035770]	mitochondrial matrix [GO:0005759]; mitochondrion [GO:0005739]; ribonucleoprotein granule [GO:0035770]; RNA binding [GO:0003723]; mitochondrial mRNA processing [GO:0090615]; mitochondrial RNA processing [GO:0000963]; mRNA metabolic process [GO:0016071]; regulation of mitochondrial mRNA stability [GO:0044528]	RNA binding [GO:0003723]	SUBCELLULAR LOCATION: Mitochondrion matrix {ECO:0000250|UniProtKB:Q969Z0}.	6	7	7	8	9	9
Q91VL8	TE2IP_MOUSE	Telomeric repeat-binding factor 2-interacting protein 1 (TERF2-interacting telomeric protein 1) (TRF2-interacting telomeric protein 1) (Repressor/activator protein 1 homolog) (RAP1 homolog)	Terf2ip	0	1.1187	0.399174	0	intracellular signal transduction [GO:0035556]; negative regulation of DNA recombination at telomere [GO:0048239]; negative regulation of protein phosphorylation [GO:0001933]; negative regulation of telomere maintenance [GO:0032205]; positive regulation of canonical NF-kappaB signal transduction [GO:0043123]; positive regulation of NF-kappaB transcription factor activity [GO:0051092]; positive re…	chromosome, telomeric region [GO:0000781]; cytoplasm [GO:0005737]; male germ cell nucleus [GO:0001673]; nuclear body [GO:0016604]; nuclear telomere cap complex [GO:0000783]; nucleoplasm [GO:0005654]; nucleus [GO:0005634]; shelterin complex [GO:0070187]	chromosome, telomeric region [GO:0000781]; cytoplasm [GO:0005737]; male germ cell nucleus [GO:0001673]; nuclear body [GO:0016604]; nuclear telomere cap complex [GO:0000783]; nucleoplasm [GO:0005654]; nucleus [GO:0005634]; shelterin complex [GO:0070187]; G-rich strand telomeric DNA binding [GO:0098505]; phosphatase binding [GO:0019902]; telomeric DNA binding [GO:0042162]; intracellular signal tran…	G-rich strand telomeric DNA binding [GO:0098505]; phosphatase binding [GO:0019902]; telomeric DNA binding [GO:0042162]	SUBCELLULAR LOCATION: Nucleus {ECO:0000269|PubMed:20622870}. Cytoplasm {ECO:0000269|PubMed:20622870}. Chromosome {ECO:0000269|PubMed:20622869}. Chromosome, telomere {ECO:0000269|PubMed:20622869}. Note=Associates with chromosomes, both at telomeres and in extratelomeric sites (PubMed:20622869). Also exists as a cytoplasmic form, where it associates with the IKK complex (PubMed:20622870). {ECO:0000…	33	32	30	28	31	31
Q9D1D4	TMEDA_MOUSE	Transmembrane emp24 domain-containing protein 10 (Protein Tmed10) (21 kDa transmembrane-trafficking protein) (Transmembrane protein Tmp21) (p24 family protein delta-1) (p24delta1)	Tmed10	1	2.48463	0.988654	0	COPI-coated vesicle budding [GO:0035964]; cytosol to ERGIC protein transport [GO:0106273]; endoplasmic reticulum to Golgi vesicle-mediated transport [GO:0006888]; Golgi organization [GO:0007030]; intracellular protein transport [GO:0006886]; positive regulation of interleukin-1 production [GO:0032732]; positive regulation of protein secretion [GO:0050714]; protein localization to ERGIC [GO:010627…	cis-Golgi network [GO:0005801]; COPI-coated vesicle [GO:0030137]; COPII-coated ER to Golgi transport vesicle [GO:0030134]; endoplasmic reticulum [GO:0005783]; endoplasmic reticulum membrane [GO:0005789]; endoplasmic reticulum-Golgi intermediate compartment [GO:0005793]; endoplasmic reticulum-Golgi intermediate compartment membrane [GO:0033116]; gamma-secretase complex [GO:0070765]; Golgi apparatu…	cis-Golgi network [GO:0005801]; COPI-coated vesicle [GO:0030137]; COPII-coated ER to Golgi transport vesicle [GO:0030134]; endoplasmic reticulum [GO:0005783]; endoplasmic reticulum membrane [GO:0005789]; endoplasmic reticulum-Golgi intermediate compartment [GO:0005793]; endoplasmic reticulum-Golgi intermediate compartment membrane [GO:0033116]; gamma-secretase complex [GO:0070765]; Golgi apparatu…	protein transmembrane transporter activity [GO:0008320]; protein-containing complex binding [GO:0044877]; syntaxin binding [GO:0019905]	SUBCELLULAR LOCATION: Endoplasmic reticulum membrane {ECO:0000250|UniProtKB:P49755}; Single-pass type I membrane protein {ECO:0000255}. Endoplasmic reticulum-Golgi intermediate compartment membrane {ECO:0000250|UniProtKB:P49755}; Single-pass type I membrane protein {ECO:0000255}. Golgi apparatus membrane {ECO:0000269|PubMed:10660306}; Single-pass type I membrane protein {ECO:0000255}. Golgi appar…	6	4	3	6	6	6
Q9R0Q3	TMED2_MOUSE	Transmembrane emp24 domain-containing protein 2 (COPI-coated vesicle membrane protein p24) (Membrane protein p24A) (Sid 394) (p24 family protein beta-1) (p24beta1)	Tmed2	1	2.14315	1.62532	0	allantois development [GO:1905069]; branching involved in labyrinthine layer morphogenesis [GO:0060670]; chorion development [GO:0060717]; embryonic morphogenesis [GO:0048598]; embryonic placenta development [GO:0001892]; endoplasmic reticulum membrane organization [GO:0090158]; endoplasmic reticulum organization [GO:0007029]; endoplasmic reticulum to Golgi vesicle-mediated transport [GO:0006888]…	COPI-coated vesicle [GO:0030137]; COPI-coated vesicle membrane [GO:0030663]; COPII-coated ER to Golgi transport vesicle [GO:0030134]; endoplasmic reticulum [GO:0005783]; endoplasmic reticulum membrane [GO:0005789]; endoplasmic reticulum-Golgi intermediate compartment [GO:0005793]; endoplasmic reticulum-Golgi intermediate compartment membrane [GO:0033116]; Golgi apparatus [GO:0005794]; Golgi ciste…	COPI-coated vesicle [GO:0030137]; COPI-coated vesicle membrane [GO:0030663]; COPII-coated ER to Golgi transport vesicle [GO:0030134]; endoplasmic reticulum [GO:0005783]; endoplasmic reticulum membrane [GO:0005789]; endoplasmic reticulum-Golgi intermediate compartment [GO:0005793]; endoplasmic reticulum-Golgi intermediate compartment membrane [GO:0033116]; Golgi apparatus [GO:0005794]; Golgi ciste…	frizzled binding [GO:0005109]; smoothened binding [GO:0005119]	SUBCELLULAR LOCATION: Cytoplasmic vesicle membrane {ECO:0000250|UniProtKB:Q15363}; Single-pass type I membrane protein {ECO:0000255}. Cytoplasmic vesicle, COPI-coated vesicle membrane {ECO:0000250|UniProtKB:Q15363}; Single-pass type I membrane protein {ECO:0000255}. Golgi apparatus, cis-Golgi network membrane {ECO:0000250|UniProtKB:Q15363}; Single-pass type I membrane protein {ECO:0000255}. Golgi…	3	3	3	5	4	4
Q8R1V4	TMED4_MOUSE	Transmembrane emp24 domain-containing protein 4 (Endoplasmic reticulum stress-response protein 25) (ERS25) (p24 family protein alpha-3) (p24alpha3) (p26)	Tmed4	2	1.10989	0.406265	0	endoplasmic reticulum to Golgi vesicle-mediated transport [GO:0006888]; Golgi organization [GO:0007030]; intracellular protein transport [GO:0006886]	COPII-coated ER to Golgi transport vesicle [GO:0030134]; endoplasmic reticulum [GO:0005783]; endoplasmic reticulum membrane [GO:0005789]; endoplasmic reticulum-Golgi intermediate compartment [GO:0005793]; Golgi apparatus [GO:0005794]	COPII-coated ER to Golgi transport vesicle [GO:0030134]; endoplasmic reticulum [GO:0005783]; endoplasmic reticulum membrane [GO:0005789]; endoplasmic reticulum-Golgi intermediate compartment [GO:0005793]; Golgi apparatus [GO:0005794]; endoplasmic reticulum to Golgi vesicle-mediated transport [GO:0006888]; Golgi organization [GO:0007030]; intracellular protein transport [GO:0006886]		SUBCELLULAR LOCATION: Endoplasmic reticulum membrane {ECO:0000269|PubMed:18326488}; Single-pass type I membrane protein {ECO:0000269|PubMed:18326488}.	5	6	5	6	7	6
Q9CXE7	TMED5_MOUSE	Transmembrane emp24 domain-containing protein 5 (p24 family protein gamma-2) (p24gamma2)	Tmed5	1	1.68096	1.79239	0	endoplasmic reticulum to Golgi vesicle-mediated transport [GO:0006888]; Golgi ribbon formation [GO:0090161]; intracellular protein transport [GO:0006886]	cis-Golgi network [GO:0005801]; COPII-coated ER to Golgi transport vesicle [GO:0030134]; endoplasmic reticulum [GO:0005783]; endoplasmic reticulum exit site [GO:0070971]; endoplasmic reticulum membrane [GO:0005789]; endoplasmic reticulum-Golgi intermediate compartment [GO:0005793]; endoplasmic reticulum-Golgi intermediate compartment membrane [GO:0033116]; Golgi apparatus [GO:0005794]	cis-Golgi network [GO:0005801]; COPII-coated ER to Golgi transport vesicle [GO:0030134]; endoplasmic reticulum [GO:0005783]; endoplasmic reticulum exit site [GO:0070971]; endoplasmic reticulum membrane [GO:0005789]; endoplasmic reticulum-Golgi intermediate compartment [GO:0005793]; endoplasmic reticulum-Golgi intermediate compartment membrane [GO:0033116]; Golgi apparatus [GO:0005794]; endoplasmi…		SUBCELLULAR LOCATION: Endoplasmic reticulum membrane {ECO:0000250}; Single-pass type I membrane protein {ECO:0000250}. Golgi apparatus, cis-Golgi network membrane {ECO:0000250}; Single-pass type I membrane protein {ECO:0000250}. Endoplasmic reticulum-Golgi intermediate compartment membrane {ECO:0000250}; Single-pass type I membrane protein {ECO:0000250}. Note=Probably cycles between compartments …	2	3	3	4	4	3
D3YZZ5	D3YZZ5_MOUSE	Transmembrane p24 trafficking protein 7	Tmed7	1	0.19052	-0.062095	0	endoplasmic reticulum to Golgi vesicle-mediated transport [GO:0006888]; Golgi organization [GO:0007030]; intracellular protein transport [GO:0006886]	COPII-coated ER to Golgi transport vesicle [GO:0030134]; endoplasmic reticulum [GO:0005783]; endoplasmic reticulum membrane [GO:0005789]; endoplasmic reticulum-Golgi intermediate compartment [GO:0005793]; endoplasmic reticulum-Golgi intermediate compartment membrane [GO:0033116]; Golgi apparatus [GO:0005794]	COPII-coated ER to Golgi transport vesicle [GO:0030134]; endoplasmic reticulum [GO:0005783]; endoplasmic reticulum membrane [GO:0005789]; endoplasmic reticulum-Golgi intermediate compartment [GO:0005793]; endoplasmic reticulum-Golgi intermediate compartment membrane [GO:0033116]; Golgi apparatus [GO:0005794]; endoplasmic reticulum to Golgi vesicle-mediated transport [GO:0006888]; Golgi organizati…		SUBCELLULAR LOCATION: Endoplasmic reticulum membrane {ECO:0000256|ARBA:ARBA00004115}; Single-pass type I membrane protein {ECO:0000256|ARBA:ARBA00004115}. Endoplasmic reticulum-Golgi intermediate compartment membrane {ECO:0000256|ARBA:ARBA00004151}; Single-pass type I membrane protein {ECO:0000256|ARBA:ARBA00004151}. Golgi apparatus, cis-Golgi network membrane {ECO:0000256|ARBA:ARBA00004619}; Sin…	7	8	6	5	6	7
Q99KF1	TMED9_MOUSE	Transmembrane emp24 domain-containing protein 9 (Glycoprotein 25L2) (p24 family protein alpha-2) (p24alpha2)	Tmed9	1	0.4214	0.219886	0	COPI coating of Golgi vesicle [GO:0048205]; endoplasmic reticulum to Golgi vesicle-mediated transport [GO:0006888]; Golgi organization [GO:0007030]; intracellular protein transport [GO:0006886]; positive regulation of organelle organization [GO:0010638]	COPII-coated ER to Golgi transport vesicle [GO:0030134]; endoplasmic reticulum [GO:0005783]; endoplasmic reticulum membrane [GO:0005789]; endoplasmic reticulum-Golgi intermediate compartment [GO:0005793]; endoplasmic reticulum-Golgi intermediate compartment membrane [GO:0033116]; Golgi apparatus [GO:0005794]; Golgi membrane [GO:0000139]; synaptic vesicle [GO:0008021]	COPII-coated ER to Golgi transport vesicle [GO:0030134]; endoplasmic reticulum [GO:0005783]; endoplasmic reticulum membrane [GO:0005789]; endoplasmic reticulum-Golgi intermediate compartment [GO:0005793]; endoplasmic reticulum-Golgi intermediate compartment membrane [GO:0033116]; Golgi apparatus [GO:0005794]; Golgi membrane [GO:0000139]; synaptic vesicle [GO:0008021]; syntaxin binding [GO:0019905…	syntaxin binding [GO:0019905]	SUBCELLULAR LOCATION: Endoplasmic reticulum membrane {ECO:0000250}; Single-pass type I membrane protein {ECO:0000250}. Golgi apparatus, cis-Golgi network membrane {ECO:0000250}; Single-pass type I membrane protein {ECO:0000250}. Endoplasmic reticulum-Golgi intermediate compartment membrane {ECO:0000250}; Single-pass type I membrane protein {ECO:0000250}. Golgi apparatus, trans-Golgi network membr…	6	6	6	7	6	5
Q8VBT0	TMX1_MOUSE	Thioredoxin-related transmembrane protein 1 (Protein disulfide-isomerase TMX1) (EC 5.3.4.1) (Thioredoxin domain-containing protein 1)	Tmx1	2	1.34148	-0.549032	0	negative regulation of platelet aggregation [GO:0090331]; negative regulation of triglyceride biosynthetic process [GO:0010868]; positive regulation of ERAD pathway [GO:1904294]; regulation of calcium ion transport [GO:0051924]; response to endoplasmic reticulum stress [GO:0034976]	endomembrane system [GO:0012505]; endoplasmic reticulum membrane [GO:0005789]; extracellular region [GO:0005576]; mitochondria-associated endoplasmic reticulum membrane [GO:0044233]; mitochondrial membrane [GO:0031966]	endomembrane system [GO:0012505]; endoplasmic reticulum membrane [GO:0005789]; extracellular region [GO:0005576]; mitochondria-associated endoplasmic reticulum membrane [GO:0044233]; mitochondrial membrane [GO:0031966]; disulfide oxidoreductase activity [GO:0015036]; enzyme inhibitor activity [GO:0004857]; protein disulfide isomerase activity [GO:0003756]; protein-disulfide reductase activity [GO…	disulfide oxidoreductase activity [GO:0015036]; enzyme inhibitor activity [GO:0004857]; protein disulfide isomerase activity [GO:0003756]; protein-disulfide reductase activity [GO:0015035]	SUBCELLULAR LOCATION: Endoplasmic reticulum membrane {ECO:0000250|UniProtKB:Q9H3N1}; Single-pass type I membrane protein {ECO:0000255}. Mitochondrion membrane {ECO:0000250|UniProtKB:Q9H3N1}; Single-pass type I membrane protein {ECO:0000255}. Secreted {ECO:0000250|UniProtKB:Q9H3N1}. Note=Predominantly found in the endoplasmic reticulum. Secreted in the extracellular space following thrombin stimul…	3	3	3	3	4	3
Q8BXZ1	TMX3_MOUSE	Protein disulfide-isomerase TMX3 (EC 5.3.4.1) (Thioredoxin domain-containing protein 10) (Thioredoxin-related transmembrane protein 3)	Tmx3	1	0.41234	1.5655	0		cell surface [GO:0009986]; endoplasmic reticulum [GO:0005783]; endoplasmic reticulum membrane [GO:0005789]	cell surface [GO:0009986]; endoplasmic reticulum [GO:0005783]; endoplasmic reticulum membrane [GO:0005789]; protein disulfide isomerase activity [GO:0003756]; protein-disulfide reductase activity [GO:0015035]	protein disulfide isomerase activity [GO:0003756]; protein-disulfide reductase activity [GO:0015035]	SUBCELLULAR LOCATION: Endoplasmic reticulum membrane {ECO:0000250|UniProtKB:Q96JJ7}; Single-pass membrane protein {ECO:0000250|UniProtKB:Q96JJ7}.	6	1	2	3	3	3
P58871	TB182_MOUSE	182 kDa tankyrase-1-binding protein	Tnks1bp1	0	3.94399	4.74195	0	cellular response to ionizing radiation [GO:0071479]; double-strand break repair [GO:0006302]; positive regulation of peptidyl-serine phosphorylation [GO:0033138]; positive regulation of peptidyl-threonine phosphorylation [GO:0010800]; positive regulation of protein autophosphorylation [GO:0031954]	adherens junction [GO:0005912]; CCR4-NOT complex [GO:0030014]; cytoplasm [GO:0005737]; cytoskeleton [GO:0005856]; cytosol [GO:0005829]; heterochromatin [GO:0000792]; nucleus [GO:0005634]; plasma membrane [GO:0005886]	adherens junction [GO:0005912]; CCR4-NOT complex [GO:0030014]; cytoplasm [GO:0005737]; cytoskeleton [GO:0005856]; cytosol [GO:0005829]; heterochromatin [GO:0000792]; nucleus [GO:0005634]; plasma membrane [GO:0005886]; ankyrin repeat binding [GO:0071532]; enzyme binding [GO:0019899]; protein-containing complex binding [GO:0044877]; cellular response to ionizing radiation [GO:0071479]; double-stran…	ankyrin repeat binding [GO:0071532]; enzyme binding [GO:0019899]; protein-containing complex binding [GO:0044877]	SUBCELLULAR LOCATION: Nucleus {ECO:0000250}. Cytoplasm, cytoskeleton {ECO:0000250}. Chromosome {ECO:0000250}. Note=Colocalizes with chromosomes during mitosis, and in the cytoplasm with cortical actin. {ECO:0000250}.	0	0	0	1	1	2
Q3UDC3	Q3UDC3_MOUSE	Target of myb1 trafficking protein	Tom1	0	1.51084	1.08443	0	autophagosome-lysosome fusion [GO:0061909]; endosomal transport [GO:0016197]; positive regulation of autophagosome maturation [GO:1901098]; protein transport [GO:0015031]; regulation of endosome organization [GO:1904978]; substrate localization to autophagosome [GO:0061753]	cytosol [GO:0005829]; early endosome [GO:0005769]; endosome membrane [GO:0010008]	cytosol [GO:0005829]; early endosome [GO:0005769]; endosome membrane [GO:0010008]; clathrin heavy chain binding [GO:0032050]; myosin VI binding [GO:0070853]; phosphatidylinositol-5-phosphate binding [GO:0010314]; polyubiquitin modification-dependent protein binding [GO:0031593]; ubiquitin binding [GO:0043130]; autophagosome-lysosome fusion [GO:0061909]; endosomal transport [GO:0016197]; positive …	clathrin heavy chain binding [GO:0032050]; myosin VI binding [GO:0070853]; phosphatidylinositol-5-phosphate binding [GO:0010314]; polyubiquitin modification-dependent protein binding [GO:0031593]; ubiquitin binding [GO:0043130]		0	0	0	1	2	2
Q62348	TSN_MOUSE	Translin (EC 3.1.-.-) (Component 3 of promoter of RISC) (C3PO) (Testis/brain RNA-binding protein) (TB-RBP)	Tsn	0	0.160202	-0.0961933	0	regulatory ncRNA-mediated post-transcriptional gene silencing [GO:0035194]; siRNA processing [GO:0030422]	cytoplasm [GO:0005737]; endoplasmic reticulum [GO:0005783]; endoribonuclease complex [GO:1902555]; male germ cell nucleus [GO:0001673]; nucleoplasm [GO:0005654]; nucleus [GO:0005634]	cytoplasm [GO:0005737]; endoplasmic reticulum [GO:0005783]; endoribonuclease complex [GO:1902555]; male germ cell nucleus [GO:0001673]; nucleoplasm [GO:0005654]; nucleus [GO:0005634]; endonuclease activity [GO:0004519]; identical protein binding [GO:0042802]; mRNA binding [GO:0003729]; protein-containing complex binding [GO:0044877]; RNA binding [GO:0003723]; sequence-specific DNA binding [GO:004…	endonuclease activity [GO:0004519]; identical protein binding [GO:0042802]; mRNA binding [GO:0003729]; protein-containing complex binding [GO:0044877]; RNA binding [GO:0003723]; sequence-specific DNA binding [GO:0043565]; single-stranded DNA binding [GO:0003697]	SUBCELLULAR LOCATION: Cytoplasm {ECO:0000250}. Nucleus.	7	6	6	6	3	3
Q6P6J9	TXD15_MOUSE	Thioredoxin domain-containing protein 15	Txndc15	1	2.2623	0.67278	0	cilium assembly [GO:0060271]; positive regulation of smoothened signaling pathway [GO:0045880]	ciliary membrane [GO:0060170]; cilium [GO:0005929]	ciliary membrane [GO:0060170]; cilium [GO:0005929]; cilium assembly [GO:0060271]; positive regulation of smoothened signaling pathway [GO:0045880]		SUBCELLULAR LOCATION: Cell projection, cilium membrane {ECO:0000305|PubMed:29459677}; Single-pass type I membrane protein {ECO:0000255}.	5	8	5	6	5	5
Q91W90	TXND5_MOUSE	Thioredoxin domain-containing protein 5 (EC 1.8.4.-) (EC 5.3.4.1) (Endoplasmic reticulum resident protein 46) (ER protein 46) (ERp46) (Plasma cell-specific thioredoxin-related protein) (PC-TRP) (Thioredoxin-like protein p46)	Txndc5	0	1.45863	0.487787	0	protein folding [GO:0006457]	endoplasmic reticulum [GO:0005783]; endoplasmic reticulum lumen [GO:0005788]	endoplasmic reticulum [GO:0005783]; endoplasmic reticulum lumen [GO:0005788]; protein disulfide isomerase activity [GO:0003756]; protein-disulfide reductase activity [GO:0015035]; protein folding [GO:0006457]	protein disulfide isomerase activity [GO:0003756]; protein-disulfide reductase activity [GO:0015035]	SUBCELLULAR LOCATION: Endoplasmic reticulum lumen {ECO:0000255|PROSITE-ProRule:PRU10138, ECO:0000269|PubMed:12930873}.	14	13	14	13	13	13
Q9CQ69	QCR8_MOUSE	Cytochrome b-c1 complex subunit 8 (Complex III subunit 8) (Complex III subunit VIII) (Ubiquinol-cytochrome c reductase complex 9.5 kDa protein) (Ubiquinol-cytochrome c reductase complex ubiquinone-binding protein QP-C)	Uqcrq	1	0.260872	0.13502	0	cellular respiration [GO:0045333]; cerebellar Purkinje cell layer development [GO:0021680]; hippocampus development [GO:0021766]; hypothalamus development [GO:0021854]; midbrain development [GO:0030901]; mitochondrial electron transport, ubiquinol to cytochrome c [GO:0006122]; pons development [GO:0021548]; pyramidal neuron development [GO:0021860]; subthalamus development [GO:0021539]; thalamus …	mitochondrial inner membrane [GO:0005743]; mitochondrial respiratory chain complex III [GO:0005750]; mitochondrion [GO:0005739]	mitochondrial inner membrane [GO:0005743]; mitochondrial respiratory chain complex III [GO:0005750]; mitochondrion [GO:0005739]; cellular respiration [GO:0045333]; cerebellar Purkinje cell layer development [GO:0021680]; hippocampus development [GO:0021766]; hypothalamus development [GO:0021854]; midbrain development [GO:0030901]; mitochondrial electron transport, ubiquinol to cytochrome c [GO:00…		SUBCELLULAR LOCATION: Mitochondrion inner membrane {ECO:0000250|UniProtKB:P08525}; Single-pass membrane protein {ECO:0000250|UniProtKB:P08525}.	11	12	11	10	9	8
Q9Z1Z0	USO1_MOUSE	General vesicular transport factor p115 (Protein USO1 homolog) (Transcytosis-associated protein) (TAP) (Vesicle-docking protein)	Uso1	0	1.37141	0.649343	0	endoplasmic reticulum to Golgi vesicle-mediated transport [GO:0006888]; Golgi organization [GO:0007030]; Golgi vesicle docking [GO:0048211]; intracellular protein transport [GO:0006886]; membrane fusion [GO:0061025]; regulation of cellular response to insulin stimulus [GO:1900076]; secretory granule localization [GO:0032252]; small GTPase mediated signal transduction [GO:0007264]; transcytosis [G…	cytosol [GO:0005829]; endoplasmic reticulum [GO:0005783]; ER to Golgi transport vesicle membrane [GO:0012507]; fibrillar center [GO:0001650]; Golgi apparatus [GO:0005794]; Golgi membrane [GO:0000139]; Golgi stack [GO:0005795]; perinuclear region of cytoplasm [GO:0048471]	cytosol [GO:0005829]; endoplasmic reticulum [GO:0005783]; ER to Golgi transport vesicle membrane [GO:0012507]; fibrillar center [GO:0001650]; Golgi apparatus [GO:0005794]; Golgi membrane [GO:0000139]; Golgi stack [GO:0005795]; perinuclear region of cytoplasm [GO:0048471]; endoplasmic reticulum to Golgi vesicle-mediated transport [GO:0006888]; Golgi organization [GO:0007030]; Golgi vesicle docking…		SUBCELLULAR LOCATION: Cytoplasm, cytosol {ECO:0000250}. Golgi apparatus membrane {ECO:0000250}; Peripheral membrane protein {ECO:0000250}. Note=Recycles between the cytosol and the Golgi apparatus during interphase. {ECO:0000250}.	3	3	4	4	5	4
P61759	PFD3_MOUSE	Prefoldin subunit 3 (von Hippel-Lindau-binding protein 1) (VBP-1) (VHL-binding protein 1)	Vbp1	0	1.97374	1.04499	0	microtubule-based process [GO:0007017]; negative regulation of amyloid fibril formation [GO:1905907]; protein folding [GO:0006457]; tubulin complex assembly [GO:0007021]	cytoplasm [GO:0005737]; cytosol [GO:0005829]; intracellular membrane-bounded organelle [GO:0043231]; nucleus [GO:0005634]; polysome [GO:0005844]; prefoldin complex [GO:0016272]	cytoplasm [GO:0005737]; cytosol [GO:0005829]; intracellular membrane-bounded organelle [GO:0043231]; nucleus [GO:0005634]; polysome [GO:0005844]; prefoldin complex [GO:0016272]; amyloid-beta binding [GO:0001540]; tubulin binding [GO:0015631]; unfolded protein binding [GO:0051082]; microtubule-based process [GO:0007017]; negative regulation of amyloid fibril formation [GO:1905907]; protein folding…	amyloid-beta binding [GO:0001540]; tubulin binding [GO:0015631]; unfolded protein binding [GO:0051082]	SUBCELLULAR LOCATION: Cytoplasm. Nucleus. Note=In complex with VHL can translocate to the nucleus.	2	3	1	3	3	2
O88342	WDR1_MOUSE	WD repeat-containing protein 1 (Actin-interacting protein 1) (AIP1)	Wdr1	0	2.87152	0.623886	0	actin cytoskeleton organization [GO:0030036]; actin filament depolymerization [GO:0030042]; actin filament fragmentation [GO:0030043]; apical junction assembly [GO:0043297]; cortical cytoskeleton organization [GO:0030865]; establishment of planar polarity of follicular epithelium [GO:0042247]; locomotion [GO:0040011]; maintenance of epithelial cell apical/basal polarity [GO:0045199]; neutrophil m…	actin cytoskeleton [GO:0015629]; cell junction [GO:0030054]; cell projection [GO:0042995]; cell-cell junction [GO:0005911]; cortical actin cytoskeleton [GO:0030864]; myelin sheath [GO:0043209]; plasma membrane [GO:0005886]; podosome [GO:0002102]	actin cytoskeleton [GO:0015629]; cell junction [GO:0030054]; cell projection [GO:0042995]; cell-cell junction [GO:0005911]; cortical actin cytoskeleton [GO:0030864]; myelin sheath [GO:0043209]; plasma membrane [GO:0005886]; podosome [GO:0002102]; actin binding [GO:0003779]; actin filament binding [GO:0051015]; actin cytoskeleton organization [GO:0030036]; actin filament depolymerization [GO:00300…	actin binding [GO:0003779]; actin filament binding [GO:0051015]	SUBCELLULAR LOCATION: Cytoplasm, cytoskeleton {ECO:0000250|UniProtKB:Q5RKI0}. Cell projection, podosome {ECO:0000250|UniProtKB:O75083}.	6	4	5	6	3	2
Q8BHB4	WDR3_MOUSE	WD repeat-containing protein 3	Wdr3	0	1.54522	0.677744	0	maturation of SSU-rRNA [GO:0030490]; ribosomal small subunit biogenesis [GO:0042274]	nuclear membrane [GO:0031965]; nucleolus [GO:0005730]; nucleoplasm [GO:0005654]; Pwp2p-containing subcomplex of 90S preribosome [GO:0034388]; small-subunit processome [GO:0032040]	nuclear membrane [GO:0031965]; nucleolus [GO:0005730]; nucleoplasm [GO:0005654]; Pwp2p-containing subcomplex of 90S preribosome [GO:0034388]; small-subunit processome [GO:0032040]; snoRNA binding [GO:0030515]; maturation of SSU-rRNA [GO:0030490]; ribosomal small subunit biogenesis [GO:0042274]	snoRNA binding [GO:0030515]	SUBCELLULAR LOCATION: Nucleus, nucleolus {ECO:0000250|UniProtKB:Q9UNX4}.	2	2	2	1	1	2
P62960	YBOX1_MOUSE	Y-box-binding protein 1 (YB-1) (CCAAT-binding transcription factor I subunit A) (CBF-A) (DNA-binding protein B) (DBPB) (Enhancer factor I subunit A) (EFI-A) (Nuclease-sensitive element-binding protein 1) (Y-box transcription factor)	Ybx1	0	1.18866	0.510841	0	cellular response to interleukin-7 [GO:0098761]; CRD-mediated mRNA stabilization [GO:0070934]; embryonic morphogenesis [GO:0048598]; epidermis development [GO:0008544]; in utero embryonic development [GO:0001701]; miRNA transport [GO:1990428]; mRNA processing [GO:0006397]; mRNA stabilization [GO:0048255]; negative regulation of cellular senescence [GO:2000773]; negative regulation of nuclear-tran…	CRD-mediated mRNA stability complex [GO:0070937]; cytoplasm [GO:0005737]; cytoplasmic stress granule [GO:0010494]; cytosol [GO:0005829]; dendrite [GO:0030425]; endoplasmic reticulum [GO:0005783]; extracellular exosome [GO:0070062]; histone pre-mRNA 3'end processing complex [GO:0071204]; intracellular membrane-bounded organelle [GO:0043231]; messenger ribonucleoprotein complex [GO:1990124]; neuron…	CRD-mediated mRNA stability complex [GO:0070937]; cytoplasm [GO:0005737]; cytoplasmic stress granule [GO:0010494]; cytosol [GO:0005829]; dendrite [GO:0030425]; endoplasmic reticulum [GO:0005783]; extracellular exosome [GO:0070062]; histone pre-mRNA 3'end processing complex [GO:0071204]; intracellular membrane-bounded organelle [GO:0043231]; messenger ribonucleoprotein complex [GO:1990124]; neuron…	C5-methylcytidine-containing RNA reader activity [GO:0062153]; chromatin binding [GO:0003682]; GTPase binding [GO:0051020]; miRNA binding [GO:0035198]; mRNA binding [GO:0003729]; nucleic acid binding [GO:0003676]; p53 binding [GO:0002039]; RNA binding [GO:0003723]; sequence-specific DNA binding [GO:0043565]; sequence-specific double-stranded DNA binding [GO:1990837]; single-stranded DNA binding […	SUBCELLULAR LOCATION: Cytoplasm {ECO:0000269|PubMed:20713358}. Nucleus {ECO:0000269|PubMed:20713358}. Cytoplasmic granule {ECO:0000250|UniProtKB:P67809}. Secreted {ECO:0000250|UniProtKB:P67809}. Secreted, extracellular exosome {ECO:0000250|UniProtKB:P67809}. Cytoplasm, P-body {ECO:0000269|PubMed:20713358}. Note=Predominantly cytoplasmic in proliferating cells. Cytotoxic stress and DNA damage enha…	2	3	3	5	4	5
Q99PE8	ABCG5_MOUSE	ATP-binding cassette sub-family G member 5 (EC 7.6.2.-) (Sterolin-1)	Abcg5	6	1.48436	0.903067	1	bile acid signaling pathway [GO:0038183]; cholesterol efflux [GO:0033344]; cholesterol homeostasis [GO:0042632]; intestinal cholesterol absorption [GO:0030299]; negative regulation of intestinal cholesterol absorption [GO:0045796]; negative regulation of intestinal phytosterol absorption [GO:0010949]; response to ionizing radiation [GO:0010212]; response to muscle activity [GO:0014850]; response …	apical part of cell [GO:0045177]; apical plasma membrane [GO:0016324]; ATP-binding cassette (ABC) transporter complex [GO:0043190]; membrane [GO:0016020]; plasma membrane [GO:0005886]; receptor complex [GO:0043235]	apical part of cell [GO:0045177]; apical plasma membrane [GO:0016324]; ATP-binding cassette (ABC) transporter complex [GO:0043190]; membrane [GO:0016020]; plasma membrane [GO:0005886]; receptor complex [GO:0043235]; ABC-type transporter activity [GO:0140359]; ATP binding [GO:0005524]; ATP hydrolysis activity [GO:0016887]; ATPase-coupled transmembrane transporter activity [GO:0042626]; cholesterol…	ABC-type transporter activity [GO:0140359]; ATP binding [GO:0005524]; ATP hydrolysis activity [GO:0016887]; ATPase-coupled transmembrane transporter activity [GO:0042626]; cholesterol transfer activity [GO:0120020]; metal ion binding [GO:0046872]; protein heterodimerization activity [GO:0046982]	SUBCELLULAR LOCATION: Cell membrane {ECO:0000269|PubMed:12208867, ECO:0000269|PubMed:18402465, ECO:0000305|PubMed:16352607}; Multi-pass membrane protein {ECO:0000305}. Apical cell membrane {ECO:0000269|PubMed:12208867, ECO:0000269|PubMed:14504269, ECO:0000269|PubMed:15040800, ECO:0000269|PubMed:16867993, ECO:0000269|PubMed:18402465}; Multi-pass membrane protein {ECO:0000305}.	1	1	1	2	2	2
Q91V92	ACLY_MOUSE	ATP-citrate synthase (EC 2.3.3.8) (ATP-citrate (pro-S-)-lyase) (Citrate cleavage enzyme)	Acly	0	1.94706	2.77623	1	acetyl-CoA biosynthetic process [GO:0006085]; acetyl-CoA metabolic process [GO:0006084]; citrate metabolic process [GO:0006101]; fatty acid biosynthetic process [GO:0006633]; lipid biosynthetic process [GO:0008610]; oxaloacetate metabolic process [GO:0006107]; tricarboxylic acid cycle [GO:0006099]	cytosol [GO:0005829]; mitochondrion [GO:0005739]; nucleoplasm [GO:0005654]	cytosol [GO:0005829]; mitochondrion [GO:0005739]; nucleoplasm [GO:0005654]; ATP binding [GO:0005524]; ATP citrate synthase activity [GO:0003878]; metal ion binding [GO:0046872]; acetyl-CoA biosynthetic process [GO:0006085]; acetyl-CoA metabolic process [GO:0006084]; citrate metabolic process [GO:0006101]; fatty acid biosynthetic process [GO:0006633]; lipid biosynthetic process [GO:0008610]; oxalo…	ATP binding [GO:0005524]; ATP citrate synthase activity [GO:0003878]; metal ion binding [GO:0046872]	SUBCELLULAR LOCATION: Cytoplasm, cytosol {ECO:0000250|UniProtKB:P53396}.	14	15	16	29	26	25
P55264	ADK_MOUSE	Adenosine kinase (AK) (EC 2.7.1.20) (Adenosine 5'-phosphotransferase)	Adk	0	1.47527	1.77179	1	adenosine metabolic process [GO:0046085]; AMP salvage [GO:0044209]; dAMP salvage [GO:0106383]; dATP biosynthetic process [GO:0006175]; GMP salvage [GO:0032263]; phosphorylation [GO:0016310]; positive regulation of cardiac muscle hypertrophy [GO:0010613]; positive regulation of T cell proliferation [GO:0042102]; purine nucleobase metabolic process [GO:0006144]; purine ribonucleoside salvage [GO:00…	cytosol [GO:0005829]; nucleoplasm [GO:0005654]; nucleus [GO:0005634]; plasma membrane [GO:0005886]	cytosol [GO:0005829]; nucleoplasm [GO:0005654]; nucleus [GO:0005634]; plasma membrane [GO:0005886]; adenosine kinase activity [GO:0004001]; ATP binding [GO:0005524]; deoxyadenosine kinase activity [GO:0004136]; metal ion binding [GO:0046872]; adenosine metabolic process [GO:0046085]; AMP salvage [GO:0044209]; dAMP salvage [GO:0106383]; dATP biosynthetic process [GO:0006175]; GMP salvage [GO:00322…	adenosine kinase activity [GO:0004001]; ATP binding [GO:0005524]; deoxyadenosine kinase activity [GO:0004136]; metal ion binding [GO:0046872]	SUBCELLULAR LOCATION: [Isoform 1]: Nucleus {ECO:0000250|UniProtKB:P55263}.; SUBCELLULAR LOCATION: [Isoform 2]: Cytoplasm {ECO:0000250|UniProtKB:P55263}.	3	2	2	3	3	4
G5E829	AT2B1_MOUSE	Plasma membrane calcium-transporting ATPase 1 (EC 7.2.2.10) (Plasma membrane calcium ATPase isoform 1) (PMCA1) (Plasma membrane calcium pump isoform 1)	Atp2b1	8	1.23614	0.514145	1	calcium ion export [GO:1901660]; calcium ion export across plasma membrane [GO:1990034]; calcium ion transport [GO:0006816]; intracellular calcium ion homeostasis [GO:0006874]; negative regulation of cytokine production [GO:0001818]; negative regulation of cytosolic calcium ion concentration [GO:0051481]; positive regulation of bone mineralization [GO:0030501]; positive regulation of calcium ion …	apical part of cell [GO:0045177]; apical plasma membrane [GO:0016324]; basolateral plasma membrane [GO:0016323]; cytoplasmic side of plasma membrane [GO:0009898]; dendrite membrane [GO:0032590]; dendritic spine membrane [GO:0032591]; GABA-ergic synapse [GO:0098982]; glutamatergic synapse [GO:0098978]; immunological synapse [GO:0001772]; intracellular membrane-bounded organelle [GO:0043231]; neuro…	apical part of cell [GO:0045177]; apical plasma membrane [GO:0016324]; basolateral plasma membrane [GO:0016323]; cytoplasmic side of plasma membrane [GO:0009898]; dendrite membrane [GO:0032590]; dendritic spine membrane [GO:0032591]; GABA-ergic synapse [GO:0098982]; glutamatergic synapse [GO:0098978]; immunological synapse [GO:0001772]; intracellular membrane-bounded organelle [GO:0043231]; neuro…	ATP binding [GO:0005524]; ATP hydrolysis activity [GO:0016887]; calcium ion transmembrane transporter activity [GO:0015085]; calmodulin binding [GO:0005516]; metal ion binding [GO:0046872]; P-type calcium transporter activity [GO:0005388]; PDZ domain binding [GO:0030165]	SUBCELLULAR LOCATION: Cell membrane {ECO:0000250|UniProtKB:P20020}; Multi-pass membrane protein {ECO:0000255}. Basolateral cell membrane {ECO:0000269|PubMed:23460639}. Synapse {ECO:0000269|PubMed:12209837}. Presynaptic cell membrane {ECO:0000269|PubMed:30862855}; Multi-pass membrane protein {ECO:0000255}. Cytoplasmic vesicle, secretory vesicle, synaptic vesicle membrane {ECO:0000269|PubMed:308628…	6	5	2	4	4	5
Q03146	DDR1_MOUSE	Epithelial discoidin domain-containing receptor 1 (Epithelial discoidin domain receptor 1) (EC 2.7.10.1) (CD167 antigen-like family member A) (Cell adhesion kinase) (Discoidin receptor tyrosine kinase) (Protein-tyrosine kinase MPK-6) (Tyrosine kinase DDR) (Tyrosine-protein kinase CAK) (CD antigen CD167a)	Ddr1	1	2.20838	0.711758	1	axon development [GO:0061564]; branching involved in mammary gland duct morphogenesis [GO:0060444]; cell population proliferation [GO:0008283]; collagen-activated tyrosine kinase receptor signaling pathway [GO:0038063]; ear development [GO:0043583]; embryo implantation [GO:0007566]; lactation [GO:0007595]; mammary gland alveolus development [GO:0060749]; negative regulation of cell population pro…	basolateral plasma membrane [GO:0016323]; brush border [GO:0005903]; plasma membrane [GO:0005886]; receptor complex [GO:0043235]	basolateral plasma membrane [GO:0016323]; brush border [GO:0005903]; plasma membrane [GO:0005886]; receptor complex [GO:0043235]; ATP binding [GO:0005524]; collagen binding [GO:0005518]; metal ion binding [GO:0046872]; protein tyrosine kinase collagen receptor activity [GO:0038062]; axon development [GO:0061564]; branching involved in mammary gland duct morphogenesis [GO:0060444]; cell population…	ATP binding [GO:0005524]; collagen binding [GO:0005518]; metal ion binding [GO:0046872]; protein tyrosine kinase collagen receptor activity [GO:0038062]	SUBCELLULAR LOCATION: Cell membrane; Single-pass type I membrane protein.	5	7	8	7	6	6
Q8K0L2	ENTP8_MOUSE	Ectonucleoside triphosphate diphosphohydrolase 8 (E-NTPDase 8) (NTPDase 8) (NTPDase8) (EC 3.6.1.5)	Entpd8	1	0.400136	0.423926	1	nucleoside diphosphate biosynthetic process [GO:0009133]; nucleoside diphosphate catabolic process [GO:0009134]; nucleoside monophosphate biosynthetic process [GO:0009124]	membrane [GO:0016020]; plasma membrane [GO:0005886]	membrane [GO:0016020]; plasma membrane [GO:0005886]; apyrase activity [GO:0004050]; ATP binding [GO:0005524]; GDP phosphatase activity [GO:0004382]; metal ion binding [GO:0046872]; nucleoside diphosphate phosphatase activity [GO:0017110]; ribonucleoside triphosphate phosphatase activity [GO:0017111]; UDP phosphatase activity [GO:0045134]; nucleoside diphosphate biosynthetic process [GO:0009133]; …	apyrase activity [GO:0004050]; ATP binding [GO:0005524]; GDP phosphatase activity [GO:0004382]; metal ion binding [GO:0046872]; nucleoside diphosphate phosphatase activity [GO:0017110]; ribonucleoside triphosphate phosphatase activity [GO:0017111]; UDP phosphatase activity [GO:0045134]	SUBCELLULAR LOCATION: Cell membrane {ECO:0000250}; Multi-pass membrane protein {ECO:0000250}.	1	1	2	1	3	1
O54984	GET3_MOUSE	ATPase GET3 (EC 3.6.-.-) (Arsenical pump-driving ATPase) (Arsenite-stimulated ATPase) (Guided entry of tail-anchored proteins factor 3, ATPase)	Get3	0	3.54248	5.3511	1	post-translational protein targeting to endoplasmic reticulum membrane [GO:0006620]; tail-anchored membrane protein insertion into ER membrane [GO:0071816]	endoplasmic reticulum membrane [GO:0005789]; GET complex [GO:0043529]; nucleolus [GO:0005730]; nucleoplasm [GO:0005654]	endoplasmic reticulum membrane [GO:0005789]; GET complex [GO:0043529]; nucleolus [GO:0005730]; nucleoplasm [GO:0005654]; ATP binding [GO:0005524]; ATP hydrolysis activity [GO:0016887]; membrane insertase activity [GO:0032977]; metal ion binding [GO:0046872]; post-translational protein targeting to endoplasmic reticulum membrane [GO:0006620]; tail-anchored membrane protein insertion into ER membra…	ATP binding [GO:0005524]; ATP hydrolysis activity [GO:0016887]; membrane insertase activity [GO:0032977]; metal ion binding [GO:0046872]	SUBCELLULAR LOCATION: Cytoplasm {ECO:0000255|HAMAP-Rule:MF_03112}. Endoplasmic reticulum {ECO:0000255|HAMAP-Rule:MF_03112}. Nucleus, nucleolus {ECO:0000255|HAMAP-Rule:MF_03112}.	2	2	3	8	10	8
A0JNY3	A0JNY3_MOUSE	Gephyrin [Includes: Molybdopterin molybdenumtransferase (MPT Mo-transferase) (EC 2.10.1.1) (Domain E); Molybdopterin adenylyltransferase (MPT adenylyltransferase) (EC 2.7.7.75) (Domain G)]	Gphn	0	1.12074	0.571813	1	gamma-aminobutyric acid receptor clustering [GO:0097112]; Mo-molybdopterin cofactor biosynthetic process [GO:0006777]; response to metal ion [GO:0010038]	dendrite [GO:0030425]; postsynaptic membrane [GO:0045211]	dendrite [GO:0030425]; postsynaptic membrane [GO:0045211]; ATP binding [GO:0005524]; identical protein binding [GO:0042802]; metal ion binding [GO:0046872]; molybdopterin adenylyltransferase activity [GO:0061598]; molybdopterin cofactor binding [GO:0043546]; molybdopterin molybdotransferase activity [GO:0061599]; nitrate reductase activity [GO:0008940]; gamma-aminobutyric acid receptor clustering…	ATP binding [GO:0005524]; identical protein binding [GO:0042802]; metal ion binding [GO:0046872]; molybdopterin adenylyltransferase activity [GO:0061598]; molybdopterin cofactor binding [GO:0043546]; molybdopterin molybdotransferase activity [GO:0061599]; nitrate reductase activity [GO:0008940]		11	10	11	11	13	10
Q9JI95	Q9JI95_MOUSE	CPN10-like protein (Heat shock protein 1 (chaperonin 10), related sequence 1)	Hspe1-rs1	0	0.524573	0.255738	1	chaperone cofactor-dependent protein refolding [GO:0051085]; female pregnancy [GO:0007565]	mitochondrial matrix [GO:0005759]; mitochondrion [GO:0005739]	mitochondrial matrix [GO:0005759]; mitochondrion [GO:0005739]; ATP binding [GO:0005524]; growth factor activity [GO:0008083]; metal ion binding [GO:0046872]; protein folding chaperone [GO:0044183]; protein-folding chaperone binding [GO:0051087]; unfolded protein binding [GO:0051082]; chaperone cofactor-dependent protein refolding [GO:0051085]; female pregnancy [GO:0007565]	ATP binding [GO:0005524]; growth factor activity [GO:0008083]; metal ion binding [GO:0046872]; protein folding chaperone [GO:0044183]; protein-folding chaperone binding [GO:0051087]; unfolded protein binding [GO:0051082]		5	6	5	3	3	3
Q8CGB9	Q8CGB9_MOUSE	Insulin degrading enzyme	Ide	0	0.994662	0.85032	1	amyloid-beta clearance by cellular catabolic process [GO:0150094]; amyloid-beta metabolic process [GO:0050435]; antigen processing and presentation of endogenous peptide antigen via MHC class I [GO:0019885]; bradykinin catabolic process [GO:0010815]; hormone catabolic process [GO:0042447]; insulin catabolic process [GO:1901143]; proteolysis involved in protein catabolic process [GO:0051603]; regu…	basolateral plasma membrane [GO:0016323]; cytosol [GO:0005829]; external side of plasma membrane [GO:0009897]; extracellular space [GO:0005615]; mitochondrion [GO:0005739]; nucleus [GO:0005634]; peroxisome [GO:0005777]	basolateral plasma membrane [GO:0016323]; cytosol [GO:0005829]; external side of plasma membrane [GO:0009897]; extracellular space [GO:0005615]; mitochondrion [GO:0005739]; nucleus [GO:0005634]; peroxisome [GO:0005777]; ATP binding [GO:0005524]; insulin binding [GO:0043559]; metalloendopeptidase activity [GO:0004222]; protein homodimerization activity [GO:0042803]; ubiquitin-dependent protein bin…	ATP binding [GO:0005524]; insulin binding [GO:0043559]; metalloendopeptidase activity [GO:0004222]; protein homodimerization activity [GO:0042803]; ubiquitin-dependent protein binding [GO:0140036]; zinc ion binding [GO:0008270]		11	4	8	8	9	7
Q9WV85	NDK3_MOUSE	Nucleoside diphosphate kinase 3 (NDK 3) (NDP kinase 3) (EC 2.7.4.6) (DR-nm23) (Nucleoside diphosphate kinase C) (NDPKC) (nm23-M3)	Nme3	0	0.0145149	0.011989	1	CTP biosynthetic process [GO:0006241]; DNA repair [GO:0006281]; dTMP biosynthetic process [GO:0006231]; GTP biosynthetic process [GO:0006183]; mitochondrial fusion [GO:0008053]; nucleoside triphosphate biosynthetic process [GO:0009142]; phosphorylation [GO:0016310]; UTP biosynthetic process [GO:0006228]	ciliary basal body [GO:0036064]; mitochondrial outer membrane [GO:0005741]; mitochondrion [GO:0005739]	ciliary basal body [GO:0036064]; mitochondrial outer membrane [GO:0005741]; mitochondrion [GO:0005739]; ATP binding [GO:0005524]; metal ion binding [GO:0046872]; nucleoside diphosphate kinase activity [GO:0004550]; CTP biosynthetic process [GO:0006241]; DNA repair [GO:0006281]; dTMP biosynthetic process [GO:0006231]; GTP biosynthetic process [GO:0006183]; mitochondrial fusion [GO:0008053]; nucleo…	ATP binding [GO:0005524]; metal ion binding [GO:0046872]; nucleoside diphosphate kinase activity [GO:0004550]	SUBCELLULAR LOCATION: Mitochondrion outer membrane {ECO:0000250|UniProtKB:Q13232}; Peripheral membrane protein {ECO:0000250|UniProtKB:Q13232}. Cytoplasm {ECO:0000250|UniProtKB:Q13232}. Cytoplasm, cytoskeleton, cilium basal body {ECO:0000269|PubMed:30111592}.	5	4	7	4	4	3
Q8VC30	TKFC_MOUSE	Triokinase/FMN cyclase (Bifunctional ATP-dependent dihydroxyacetone kinase/FAD-AMP lyase (cyclizing)) [Includes: ATP-dependent dihydroxyacetone kinase (DHA kinase) (EC 2.7.1.28) (EC 2.7.1.29) (Glycerone kinase) (Triokinase) (Triose kinase); FAD-AMP lyase (cyclizing) (EC 4.6.1.15) (FAD-AMP lyase (cyclic FMN forming)) (FMN cyclase)]	Tkfc	0	3.35031	1.94342	1	carbohydrate metabolic process [GO:0005975]; carbohydrate phosphorylation [GO:0046835]; fructose catabolic process to hydroxyacetone phosphate and glyceraldehyde-3-phosphate [GO:0061624]; glycerol catabolic process [GO:0019563]; glycolytic process through fructose-1-phosphate [GO:0061625]; negative regulation of MDA-5 signaling pathway [GO:0039534]; regulation of innate immune response [GO:004508…	cytosol [GO:0005829]	cytosol [GO:0005829]; ATP binding [GO:0005524]; FAD-AMP lyase (cyclizing) activity [GO:0034012]; glycerone kinase activity [GO:0004371]; metal ion binding [GO:0046872]; triokinase activity [GO:0050354]; carbohydrate metabolic process [GO:0005975]; carbohydrate phosphorylation [GO:0046835]; fructose catabolic process to hydroxyacetone phosphate and glyceraldehyde-3-phosphate [GO:0061624]; glycerol…	ATP binding [GO:0005524]; FAD-AMP lyase (cyclizing) activity [GO:0034012]; glycerone kinase activity [GO:0004371]; metal ion binding [GO:0046872]; triokinase activity [GO:0050354]		9	6	8	16	15	14
Q99JW2	ACY1_MOUSE	Aminoacylase-1 (ACY-1) (EC 3.5.1.14) (N-acyl-L-amino-acid amidohydrolase)	Acy1	0	0.468395	-0.39236	0	amino acid metabolic process [GO:0006520]	cytoplasm [GO:0005737]; extracellular exosome [GO:0070062]	cytoplasm [GO:0005737]; extracellular exosome [GO:0070062]; aminoacylase activity [GO:0004046]; identical protein binding [GO:0042802]; metal ion binding [GO:0046872]; amino acid metabolic process [GO:0006520]	aminoacylase activity [GO:0004046]; identical protein binding [GO:0042802]; metal ion binding [GO:0046872]	SUBCELLULAR LOCATION: Cytoplasm {ECO:0000250}.	5	4	5	5	2	2
P97857	ATS1_MOUSE	A disintegrin and metalloproteinase with thrombospondin motifs 1 (ADAM-TS 1) (ADAM-TS1) (ADAMTS-1) (EC 3.4.24.-)	Adamts1	0	0.783769	0.352929	0	extracellular matrix organization [GO:0030198]; heart trabecula formation [GO:0060347]; kidney development [GO:0001822]; negative regulation of angiogenesis [GO:0016525]; ovulation from ovarian follicle [GO:0001542]; positive regulation of G1/S transition of mitotic cell cycle [GO:1900087]; positive regulation of neuron projection development [GO:0010976]; positive regulation of vascular associat…	basement membrane [GO:0005604]; collagen-containing extracellular matrix [GO:0062023]; cytoplasmic vesicle [GO:0031410]; extracellular matrix [GO:0031012]; extracellular region [GO:0005576]	basement membrane [GO:0005604]; collagen-containing extracellular matrix [GO:0062023]; cytoplasmic vesicle [GO:0031410]; extracellular matrix [GO:0031012]; extracellular region [GO:0005576]; heparin binding [GO:0008201]; metalloendopeptidase activity [GO:0004222]; zinc ion binding [GO:0008270]; extracellular matrix organization [GO:0030198]; heart trabecula formation [GO:0060347]; kidney developm…	heparin binding [GO:0008201]; metalloendopeptidase activity [GO:0004222]; zinc ion binding [GO:0008270]	SUBCELLULAR LOCATION: Secreted, extracellular space, extracellular matrix.	3	3	2	1	1	2
P10518	HEM2_MOUSE	Delta-aminolevulinic acid dehydratase (ALADH) (EC 4.2.1.24) (Porphobilinogen synthase)	Alad	0	0.640666	0.256309	0	cellular response to interleukin-4 [GO:0071353]; cellular response to lead ion [GO:0071284]; heme A biosynthetic process [GO:0006784]; heme B biosynthetic process [GO:0006785]; heme biosynthetic process [GO:0006783]; heme O biosynthetic process [GO:0048034]; negative regulation of proteasomal protein catabolic process [GO:1901799]; protein homooligomerization [GO:0051260]; protoporphyrinogen IX b…	cytosol [GO:0005829]; extracellular space [GO:0005615]	cytosol [GO:0005829]; extracellular space [GO:0005615]; identical protein binding [GO:0042802]; porphobilinogen synthase activity [GO:0004655]; proteasome core complex binding [GO:1904854]; zinc ion binding [GO:0008270]; cellular response to interleukin-4 [GO:0071353]; cellular response to lead ion [GO:0071284]; heme A biosynthetic process [GO:0006784]; heme B biosynthetic process [GO:0006785]; h…	identical protein binding [GO:0042802]; porphobilinogen synthase activity [GO:0004655]; proteasome core complex binding [GO:1904854]; zinc ion binding [GO:0008270]		21	21	19	18	18	17
P97449	AMPN_MOUSE	Aminopeptidase N (AP-N) (mAPN) (EC 3.4.11.2) (Alanyl aminopeptidase) (Aminopeptidase M) (AP-M) (Membrane protein p161) (Microsomal aminopeptidase) (CD antigen CD13)	Anpep	0	0.043169	0.0331084	0	angiogenesis [GO:0001525]; cell differentiation [GO:0030154]; peptide catabolic process [GO:0043171]; protein processing [GO:0016485]; proteolysis [GO:0006508]	brush border membrane [GO:0031526]; cytoplasm [GO:0005737]; endoplasmic reticulum-Golgi intermediate compartment [GO:0005793]; external side of plasma membrane [GO:0009897]; extracellular exosome [GO:0070062]; extracellular space [GO:0005615]; plasma membrane [GO:0005886]	brush border membrane [GO:0031526]; cytoplasm [GO:0005737]; endoplasmic reticulum-Golgi intermediate compartment [GO:0005793]; external side of plasma membrane [GO:0009897]; extracellular exosome [GO:0070062]; extracellular space [GO:0005615]; plasma membrane [GO:0005886]; aminopeptidase activity [GO:0004177]; metalloaminopeptidase activity [GO:0070006]; peptide binding [GO:0042277]; zinc ion bin…	aminopeptidase activity [GO:0004177]; metalloaminopeptidase activity [GO:0070006]; peptide binding [GO:0042277]; zinc ion binding [GO:0008270]	SUBCELLULAR LOCATION: Cell membrane {ECO:0000269|PubMed:8805662}; Single-pass type II membrane protein {ECO:0000250|UniProtKB:P15144}. Note=Also found as a soluble form. {ECO:0000250|UniProtKB:P15144}.	37	37	32	29	30	26
P08226	APOE_MOUSE	Apolipoprotein E (Apo-E)	Apoe	0	1.01846	0.367243	0	AMPA glutamate receptor clustering [GO:0097113]; amyloid precursor protein metabolic process [GO:0042982]; artery morphogenesis [GO:0048844]; cGMP-mediated signaling [GO:0019934]; cholesterol catabolic process [GO:0006707]; cholesterol efflux [GO:0033344]; cholesterol homeostasis [GO:0042632]; cholesterol metabolic process [GO:0008203]; chylomicron remnant clearance [GO:0034382]; circulatory syst…	cell surface [GO:0009986]; chylomicron [GO:0042627]; chylomicron remnant [GO:0034360]; cytosol [GO:0005829]; dendrite [GO:0030425]; discoidal high-density lipoprotein particle [GO:0034365]; endoplasmic reticulum [GO:0005783]; endosome [GO:0005768]; extracellular exosome [GO:0070062]; extracellular matrix [GO:0031012]; extracellular region [GO:0005576]; extracellular space [GO:0005615]; extrinsic …	cell surface [GO:0009986]; chylomicron [GO:0042627]; chylomicron remnant [GO:0034360]; cytosol [GO:0005829]; dendrite [GO:0030425]; discoidal high-density lipoprotein particle [GO:0034365]; endoplasmic reticulum [GO:0005783]; endosome [GO:0005768]; extracellular exosome [GO:0070062]; extracellular matrix [GO:0031012]; extracellular region [GO:0005576]; extracellular space [GO:0005615]; extrinsic …	amyloid-beta binding [GO:0001540]; antioxidant activity [GO:0016209]; cholesterol transfer activity [GO:0120020]; enzyme binding [GO:0019899]; heparan sulfate proteoglycan binding [GO:0043395]; heparin binding [GO:0008201]; hydroxyapatite binding [GO:0046848]; identical protein binding [GO:0042802]; lipid binding [GO:0008289]; lipid transporter activity [GO:0005319]; lipoprotein particle binding …	SUBCELLULAR LOCATION: Secreted {ECO:0000250|UniProtKB:P02649}. Secreted, extracellular space {ECO:0000250|UniProtKB:P02649}. Secreted, extracellular space, extracellular matrix {ECO:0000250|UniProtKB:P02649}. Extracellular vesicle {ECO:0000250|UniProtKB:P02649}. Endosome, multivesicular body {ECO:0000250|UniProtKB:P02649}. Note=In the plasma, APOE is associated with chylomicrons, chylomicrons rem…	14	14	13	13	12	13
P61211	ARL1_MOUSE	ADP-ribosylation factor-like protein 1	Arl1	0	1.69452	2.03908	0	Golgi organization [GO:0007030]; Golgi vesicle transport [GO:0048193]; intracellular protein transport [GO:0006886]; protein localization to Golgi apparatus [GO:0034067]; retrograde transport, endosome to Golgi [GO:0042147]; toxin metabolic process [GO:0009404]; vesicle-mediated transport [GO:0016192]	cytoplasm [GO:0005737]; cytosol [GO:0005829]; Golgi apparatus [GO:0005794]; Golgi membrane [GO:0000139]; trans-Golgi network [GO:0005802]	cytoplasm [GO:0005737]; cytosol [GO:0005829]; Golgi apparatus [GO:0005794]; Golgi membrane [GO:0000139]; trans-Golgi network [GO:0005802]; enzyme activator activity [GO:0008047]; GTP binding [GO:0005525]; GTPase activity [GO:0003924]; metal ion binding [GO:0046872]; phospholipase D activator activity [GO:1990583]; protein domain specific binding [GO:0019904]; Golgi organization [GO:0007030]; Golg…	enzyme activator activity [GO:0008047]; GTP binding [GO:0005525]; GTPase activity [GO:0003924]; metal ion binding [GO:0046872]; phospholipase D activator activity [GO:1990583]; protein domain specific binding [GO:0019904]	SUBCELLULAR LOCATION: Golgi apparatus membrane {ECO:0000250}; Peripheral membrane protein {ECO:0000250}; Cytoplasmic side {ECO:0000250}. Membrane {ECO:0000250|UniProtKB:P40616}; Lipid-anchor {ECO:0000250|UniProtKB:P40616}.	0	1	2	2	2	1
P34927	ASGR1_MOUSE	Asialoglycoprotein receptor 1 (ASGP-R 1) (ASGPR 1) (Hepatic lectin 1) (HL-1) (mHL-1)	Asgr1	1	0.661446	0.316827	0	cellular response to extracellular stimulus [GO:0031668]	external side of plasma membrane [GO:0009897]	external side of plasma membrane [GO:0009897]; asialoglycoprotein receptor activity [GO:0004873]; fucose binding [GO:0042806]; identical protein binding [GO:0042802]; mannose binding [GO:0005537]; metal ion binding [GO:0046872]; cellular response to extracellular stimulus [GO:0031668]	asialoglycoprotein receptor activity [GO:0004873]; fucose binding [GO:0042806]; identical protein binding [GO:0042802]; mannose binding [GO:0005537]; metal ion binding [GO:0046872]	SUBCELLULAR LOCATION: Membrane; Single-pass type II membrane protein.	16	15	17	16	16	15
P18572	BASI_MOUSE	Basigin (Basic immunoglobulin superfamily) (HT7 antigen) (Membrane glycoprotein gp42) (CD antigen CD147)	Bsg	1	0.893732	0.236	0	angiogenesis [GO:0001525]; cell differentiation [GO:0030154]; decidualization [GO:0046697]; embryo implantation [GO:0007566]; endothelial tube morphogenesis [GO:0061154]; neural retina development [GO:0003407]; neutrophil chemotaxis [GO:0030593]; odontogenesis of dentin-containing tooth [GO:0042475]; photoreceptor cell maintenance [GO:0045494]; positive regulation of endothelial cell migration [G…	acrosomal membrane [GO:0002080]; basolateral plasma membrane [GO:0016323]; endoplasmic reticulum membrane [GO:0005789]; endosome [GO:0005768]; intracellular membrane-bounded organelle [GO:0043231]; photoreceptor inner segment [GO:0001917]; photoreceptor outer segment [GO:0001750]; plasma membrane [GO:0005886]; sarcolemma [GO:0042383]	acrosomal membrane [GO:0002080]; basolateral plasma membrane [GO:0016323]; endoplasmic reticulum membrane [GO:0005789]; endosome [GO:0005768]; intracellular membrane-bounded organelle [GO:0043231]; photoreceptor inner segment [GO:0001917]; photoreceptor outer segment [GO:0001750]; plasma membrane [GO:0005886]; sarcolemma [GO:0042383]; mannose binding [GO:0005537]; signaling receptor activity [GO:…	mannose binding [GO:0005537]; signaling receptor activity [GO:0038023]; virus receptor activity [GO:0001618]	SUBCELLULAR LOCATION: [Isoform 1]: Cell membrane {ECO:0000269|PubMed:11273674, ECO:0000269|PubMed:25957687}; Single-pass type I membrane protein {ECO:0000250|UniProtKB:P26453}. Photoreceptor inner segment {ECO:0000269|PubMed:11853760, ECO:0000269|PubMed:25957687}. Cell projection, cilium, photoreceptor outer segment {ECO:0000269|PubMed:25957687}.; SUBCELLULAR LOCATION: [Isoform 2]: Cell membrane …	8	10	9	9	10	10
Q8R2Q8	BST2_MOUSE	Bone marrow stromal antigen 2 (BST-2) (HM1.24 antigen) (CD antigen CD317)	Bst2	1	0.48727	-0.398121	0	defense response to virus [GO:0051607]; innate immune response [GO:0045087]; negative regulation of cell growth [GO:0030308]; negative regulation of cell migration [GO:0030336]; negative regulation of intracellular transport of viral material [GO:1901253]; negative regulation of plasmacytoid dendritic cell cytokine production [GO:0002737]; negative regulation of viral genome replication [GO:00450…	apical plasma membrane [GO:0016324]; cell surface [GO:0009986]; Golgi apparatus [GO:0005794]; intracellular membrane-bounded organelle [GO:0043231]; membrane raft [GO:0045121]; multivesicular body [GO:0005771]; plasma membrane [GO:0005886]; side of membrane [GO:0098552]	apical plasma membrane [GO:0016324]; cell surface [GO:0009986]; Golgi apparatus [GO:0005794]; intracellular membrane-bounded organelle [GO:0043231]; membrane raft [GO:0045121]; multivesicular body [GO:0005771]; plasma membrane [GO:0005886]; side of membrane [GO:0098552]; identical protein binding [GO:0042802]; metalloendopeptidase inhibitor activity [GO:0008191]; protein homodimerization activity…	identical protein binding [GO:0042802]; metalloendopeptidase inhibitor activity [GO:0008191]; protein homodimerization activity [GO:0042803]	SUBCELLULAR LOCATION: Golgi apparatus, trans-Golgi network. Cell membrane; Single-pass type II membrane protein. Cell membrane {ECO:0000250}; Lipid-anchor, GPI-anchor {ECO:0000250}. Late endosome {ECO:0000250}. Membrane raft {ECO:0000250}. Cytoplasm {ECO:0000250}. Apical cell membrane {ECO:0000250}. Note=Shuttles between the cell membrane, where it is present predominantly in membrane/lipid rafts…	4	4	5	5	5	5
P24270	CATA_MOUSE	Catalase (EC 1.11.1.6)	Cat	0	1.65704	0.695969	0	aerobic respiration [GO:0009060]; cellular detoxification of hydrogen peroxide [GO:0061692]; cellular response to growth factor stimulus [GO:0071363]; cholesterol metabolic process [GO:0008203]; hemoglobin metabolic process [GO:0020027]; hydrogen peroxide catabolic process [GO:0042744]; kidney development [GO:0001822]; negative regulation of apoptotic process [GO:0043066]; positive regulation of …	catalase complex [GO:0062151]; cytoplasm [GO:0005737]; cytosol [GO:0005829]; extracellular space [GO:0005615]; intracellular membrane-bounded organelle [GO:0043231]; mitochondrion [GO:0005739]; peroxisomal matrix [GO:0005782]; peroxisomal membrane [GO:0005778]; peroxisome [GO:0005777]; protein-containing complex [GO:0032991]	catalase complex [GO:0062151]; cytoplasm [GO:0005737]; cytosol [GO:0005829]; extracellular space [GO:0005615]; intracellular membrane-bounded organelle [GO:0043231]; mitochondrion [GO:0005739]; peroxisomal matrix [GO:0005782]; peroxisomal membrane [GO:0005778]; peroxisome [GO:0005777]; protein-containing complex [GO:0032991]; aminoacylase activity [GO:0004046]; antioxidant activity [GO:0016209]; …	aminoacylase activity [GO:0004046]; antioxidant activity [GO:0016209]; catalase activity [GO:0004096]; enzyme binding [GO:0019899]; heme binding [GO:0020037]; identical protein binding [GO:0042802]; metal ion binding [GO:0046872]; NADP binding [GO:0050661]; oxidoreductase activity, acting on peroxide as acceptor [GO:0016684]; protein homodimerization activity [GO:0042803]	SUBCELLULAR LOCATION: Peroxisome {ECO:0000250|UniProtKB:P04040}.	26	23	26	23	25	20
Q91WT9	CBS_MOUSE	Cystathionine beta-synthase (EC 4.2.1.22) (Beta-thionase) (Serine sulfhydrase)	Cbs	0	0.764017	0.328673	0	blood vessel diameter maintenance [GO:0097746]; blood vessel remodeling [GO:0001974]; cartilage development involved in endochondral bone morphogenesis [GO:0060351]; cellular response to hypoxia [GO:0071456]; cerebellum morphogenesis [GO:0021587]; cysteine biosynthetic process [GO:0019344]; cysteine biosynthetic process from serine [GO:0006535]; cysteine biosynthetic process via cystathionine [GO…	cytoplasm [GO:0005737]; nucleus [GO:0005634]	cytoplasm [GO:0005737]; nucleus [GO:0005634]; carbon monoxide binding [GO:0070025]; cystathionine beta-synthase activity [GO:0004122]; enzyme binding [GO:0019899]; heme binding [GO:0020037]; identical protein binding [GO:0042802]; metal ion binding [GO:0046872]; modified amino acid binding [GO:0072341]; nitric oxide binding [GO:0070026]; nitrite reductase (NO-forming) activity [GO:0050421]; oxyge…	carbon monoxide binding [GO:0070025]; cystathionine beta-synthase activity [GO:0004122]; enzyme binding [GO:0019899]; heme binding [GO:0020037]; identical protein binding [GO:0042802]; metal ion binding [GO:0046872]; modified amino acid binding [GO:0072341]; nitric oxide binding [GO:0070026]; nitrite reductase (NO-forming) activity [GO:0050421]; oxygen binding [GO:0019825]; protein homodimerizati…	SUBCELLULAR LOCATION: Cytoplasm {ECO:0000250|UniProtKB:P35520}. Nucleus {ECO:0000250|UniProtKB:P35520}.	22	21	19	20	19	17
Q61129	CFAI_MOUSE	Complement factor I (EC 3.4.21.45) (C3B/C4B inactivator) [Cleaved into: Complement factor I heavy chain; Complement factor I light chain]	Cfi	0	1.03636	0.496493	0	complement activation [GO:0006956]; complement activation, classical pathway [GO:0006958]; innate immune response [GO:0045087]; proteolysis [GO:0006508]	extracellular space [GO:0005615]; membrane [GO:0016020]	extracellular space [GO:0005615]; membrane [GO:0016020]; metal ion binding [GO:0046872]; serine-type endopeptidase activity [GO:0004252]; complement activation [GO:0006956]; complement activation, classical pathway [GO:0006958]; innate immune response [GO:0045087]; proteolysis [GO:0006508]	metal ion binding [GO:0046872]; serine-type endopeptidase activity [GO:0004252]	SUBCELLULAR LOCATION: Secreted, extracellular space {ECO:0000250|UniProtKB:P05156}.	5	4	3	5	4	4
Q9QX15	CA3A1_MOUSE	Calcium-activated chloride channel regulator 3A-1 (EC 3.4.-.-)	Clca3a1	0	0.180297	0.204583	0	chloride transport [GO:0006821]; proteolysis [GO:0006508]	plasma membrane [GO:0005886]	plasma membrane [GO:0005886]; intracellular calcium activated chloride channel activity [GO:0005229]; metal ion binding [GO:0046872]; metallopeptidase activity [GO:0008237]; chloride transport [GO:0006821]; proteolysis [GO:0006508]	intracellular calcium activated chloride channel activity [GO:0005229]; metal ion binding [GO:0046872]; metallopeptidase activity [GO:0008237]	SUBCELLULAR LOCATION: Cell membrane {ECO:0000305}; Peripheral membrane protein {ECO:0000305}.	3	1	3	1	3	3
Q9D1A2	CNDP2_MOUSE	Cytosolic non-specific dipeptidase (EC 3.4.13.18) (CNDP dipeptidase 2) (Glutamate carboxypeptidase-like protein 1) (Threonyl dipeptidase)	Cndp2	0	1.54274	0.459854	0	proteolysis [GO:0006508]	cytosol [GO:0005829]; nucleoplasm [GO:0005654]	cytosol [GO:0005829]; nucleoplasm [GO:0005654]; alanylglutamate dipeptidase activity [GO:0103046]; carboxypeptidase activity [GO:0004180]; dipeptidase activity [GO:0016805]; metal ion binding [GO:0046872]; metallodipeptidase activity [GO:0070573]; peptidase activity [GO:0008233]; proteolysis [GO:0006508]	alanylglutamate dipeptidase activity [GO:0103046]; carboxypeptidase activity [GO:0004180]; dipeptidase activity [GO:0016805]; metal ion binding [GO:0046872]; metallodipeptidase activity [GO:0070573]; peptidase activity [GO:0008233]	SUBCELLULAR LOCATION: Cytoplasm {ECO:0000250|UniProtKB:Q96KP4}.	12	12	11	11	11	11
O88545	CSN6_MOUSE	COP9 signalosome complex subunit 6 (SGN6) (Signalosome subunit 6) (JAB1-containing signalosome subunit 6)	Cops6	1	1.39284	0.777841	0	protein deneddylation [GO:0000338]	COP9 signalosome [GO:0008180]; cytoplasm [GO:0005737]; nucleoplasm [GO:0005654]; nucleus [GO:0005634]	COP9 signalosome [GO:0008180]; cytoplasm [GO:0005737]; nucleoplasm [GO:0005654]; nucleus [GO:0005634]; metallopeptidase activity [GO:0008237]; protein deneddylation [GO:0000338]	metallopeptidase activity [GO:0008237]	SUBCELLULAR LOCATION: Cytoplasm {ECO:0000250|UniProtKB:Q7L5N1}. Nucleus {ECO:0000250|UniProtKB:Q7L5N1}.	3	3	2	2	3	3
Q9D881	Q9D881_MOUSE	Cytochrome c oxidase subunit 5B, mitochondrial (Cytochrome c oxidase polypeptide Vb)	Cox5b-ps	0	0.00487838	0.00442187	0	mitochondrial electron transport, cytochrome c to oxygen [GO:0006123]	mitochondrial respiratory chain complex IV [GO:0005751]	mitochondrial respiratory chain complex IV [GO:0005751]; metal ion binding [GO:0046872]; mitochondrial electron transport, cytochrome c to oxygen [GO:0006123]	metal ion binding [GO:0046872]		8	8	8	8	9	10
O89001	CBPD_MOUSE	Carboxypeptidase D (EC 3.4.17.22) (Metallocarboxypeptidase D) (gp180)	Cpd	1	1.37183	0.526922	0	peptide metabolic process [GO:0006518]; protein processing [GO:0016485]	extracellular space [GO:0005615]; nucleus [GO:0005634]; perinuclear region of cytoplasm [GO:0048471]; plasma membrane [GO:0005886]; trans-Golgi network [GO:0005802]	extracellular space [GO:0005615]; nucleus [GO:0005634]; perinuclear region of cytoplasm [GO:0048471]; plasma membrane [GO:0005886]; trans-Golgi network [GO:0005802]; metallocarboxypeptidase activity [GO:0004181]; protein phosphatase 2A binding [GO:0051721]; protein-containing complex binding [GO:0044877]; zinc ion binding [GO:0008270]; peptide metabolic process [GO:0006518]; protein processing [G…	metallocarboxypeptidase activity [GO:0004181]; protein phosphatase 2A binding [GO:0051721]; protein-containing complex binding [GO:0044877]; zinc ion binding [GO:0008270]	SUBCELLULAR LOCATION: Cell membrane {ECO:0000250|UniProtKB:Q90240}; Single-pass type I membrane protein {ECO:0000255}.	10	8	7	8	6	6
Q9WVJ3	CBPQ_MOUSE	Carboxypeptidase Q (EC 3.4.17.-) (Hematopoietic lineage switch 2) (Plasma glutamate carboxypeptidase)	Cpq	0	1.14034	-0.592816	0	peptide catabolic process [GO:0043171]; proteolysis [GO:0006508]; thyroid hormone generation [GO:0006590]; tissue regeneration [GO:0042246]	cytoplasm [GO:0005737]; endoplasmic reticulum [GO:0005783]; extracellular space [GO:0005615]; Golgi apparatus [GO:0005794]; intracellular membrane-bounded organelle [GO:0043231]; lysosome [GO:0005764]	cytoplasm [GO:0005737]; endoplasmic reticulum [GO:0005783]; extracellular space [GO:0005615]; Golgi apparatus [GO:0005794]; intracellular membrane-bounded organelle [GO:0043231]; lysosome [GO:0005764]; carboxypeptidase activity [GO:0004180]; metal ion binding [GO:0046872]; metallodipeptidase activity [GO:0070573]; protein homodimerization activity [GO:0042803]; peptide catabolic process [GO:00431…	carboxypeptidase activity [GO:0004180]; metal ion binding [GO:0046872]; metallodipeptidase activity [GO:0070573]; protein homodimerization activity [GO:0042803]	SUBCELLULAR LOCATION: Endoplasmic reticulum {ECO:0000250}. Golgi apparatus {ECO:0000250}. Lysosome {ECO:0000250}. Secreted {ECO:0000250}. Note=Secretion is stimulated by TSH/thyroid-stimulating hormone, INS/insulin and SST/somatostatin. {ECO:0000250}.	4	3	4	2	3	3
P67871	CSK2B_MOUSE	Casein kinase II subunit beta (CK II beta) (Phosvitin)	Csnk2b	0	1.86458	0.634935	0	adiponectin-activated signaling pathway [GO:0033211]; endothelial tube morphogenesis [GO:0061154]; negative regulation of blood vessel endothelial cell migration [GO:0043537]; negative regulation of viral life cycle [GO:1903901]; positive regulation of activin receptor signaling pathway [GO:0032927]; positive regulation of SMAD protein signal transduction [GO:0060391]; symbiont-mediated disruptio…	cell projection [GO:0042995]; chromatin [GO:0000785]; cytoplasm [GO:0005737]; cytosol [GO:0005829]; nuclear matrix [GO:0016363]; nucleus [GO:0005634]; PML body [GO:0016605]; protein kinase CK2 complex [GO:0005956]	cell projection [GO:0042995]; chromatin [GO:0000785]; cytoplasm [GO:0005737]; cytosol [GO:0005829]; nuclear matrix [GO:0016363]; nucleus [GO:0005634]; PML body [GO:0016605]; protein kinase CK2 complex [GO:0005956]; chromatin binding [GO:0003682]; identical protein binding [GO:0042802]; metal ion binding [GO:0046872]; protein domain specific binding [GO:0019904]; protein kinase regulator activity …	chromatin binding [GO:0003682]; identical protein binding [GO:0042802]; metal ion binding [GO:0046872]; protein domain specific binding [GO:0019904]; protein kinase regulator activity [GO:0019887]; protein serine/threonine kinase activity [GO:0004674]; protein-macromolecule adaptor activity [GO:0030674]; ribonucleoprotein complex binding [GO:0043021]; RNA polymerase II-specific DNA-binding transc…	SUBCELLULAR LOCATION: Nucleus {ECO:0000250|UniProtKB:P67870}.	13	13	11	10	10	10
P56395	CYB5_MOUSE	Cytochrome b5	Cyb5a	1	1.62199	0.488143	0	fatty acid metabolic process [GO:0006631]	cytosol [GO:0005829]; endoplasmic reticulum [GO:0005783]; endoplasmic reticulum membrane [GO:0005789]; intracellular membrane-bounded organelle [GO:0043231]; membrane [GO:0016020]; mitochondrial outer membrane [GO:0005741]; mitochondrion [GO:0005739]	cytosol [GO:0005829]; endoplasmic reticulum [GO:0005783]; endoplasmic reticulum membrane [GO:0005789]; intracellular membrane-bounded organelle [GO:0043231]; membrane [GO:0016020]; mitochondrial outer membrane [GO:0005741]; mitochondrion [GO:0005739]; enzyme binding [GO:0019899]; heme binding [GO:0020037]; metal ion binding [GO:0046872]; stearoyl-CoA 9-desaturase activity [GO:0004768]; fatty acid…	enzyme binding [GO:0019899]; heme binding [GO:0020037]; metal ion binding [GO:0046872]; stearoyl-CoA 9-desaturase activity [GO:0004768]	SUBCELLULAR LOCATION: Endoplasmic reticulum membrane {ECO:0000250}; Single-pass membrane protein {ECO:0000250}; Cytoplasmic side {ECO:0000250}. Microsome membrane {ECO:0000250}; Single-pass membrane protein {ECO:0000250}; Cytoplasmic side {ECO:0000250}.	5	5	5	5	5	4
Q9CQX2	CYB5B_MOUSE	Cytochrome b5 type B (Cytochrome b5 outer mitochondrial membrane isoform)	Cyb5b	1	0.733159	0.234032	0	nitric oxide biosynthetic process [GO:0006809]	intracellular membrane-bounded organelle [GO:0043231]; mitochondrial inner membrane [GO:0005743]; mitochondrial outer membrane [GO:0005741]; mitochondrion [GO:0005739]; nitric-oxide synthase complex [GO:1903958]	intracellular membrane-bounded organelle [GO:0043231]; mitochondrial inner membrane [GO:0005743]; mitochondrial outer membrane [GO:0005741]; mitochondrion [GO:0005739]; nitric-oxide synthase complex [GO:1903958]; enzyme activator activity [GO:0008047]; heme binding [GO:0020037]; metal ion binding [GO:0046872]; nitrite reductase (NO-forming) activity [GO:0050421]; nitric oxide biosynthetic process…	enzyme activator activity [GO:0008047]; heme binding [GO:0020037]; metal ion binding [GO:0046872]; nitrite reductase (NO-forming) activity [GO:0050421]	SUBCELLULAR LOCATION: Mitochondrion outer membrane {ECO:0000250|UniProtKB:P04166}.	7	7	7	6	8	7
Q3TVK3	Q3TVK3_MOUSE	Aspartyl aminopeptidase (EC 3.4.11.21)	Dnpep	0	1.82635	0.565473	0	proteolysis [GO:0006508]	cytosol [GO:0005829]	cytosol [GO:0005829]; aminopeptidase activity [GO:0004177]; identical protein binding [GO:0042802]; metallopeptidase activity [GO:0008237]; zinc ion binding [GO:0008270]; proteolysis [GO:0006508]	aminopeptidase activity [GO:0004177]; identical protein binding [GO:0042802]; metallopeptidase activity [GO:0008237]; zinc ion binding [GO:0008270]		13	14	15	13	10	12
Q9CR25	DPH2_MOUSE	2-(3-amino-3-carboxypropyl)histidine synthase subunit 2 (Diphthamide biosynthesis protein 2) (Diphtheria toxin resistance protein 2) (MmDph2) (S-adenosyl-L-methionine:L-histidine 3-amino-3-carboxypropyltransferase DPH2)	Dph2	0	1.31004	0.453764	0	protein histidyl modification to diphthamide [GO:0017183]	protein-containing complex [GO:0032991]	protein-containing complex [GO:0032991]; 2-(3-amino-3-carboxypropyl)histidine synthase activity [GO:0090560]; 4 iron, 4 sulfur cluster binding [GO:0051539]; metal ion binding [GO:0046872]; protein histidyl modification to diphthamide [GO:0017183]	2-(3-amino-3-carboxypropyl)histidine synthase activity [GO:0090560]; 4 iron, 4 sulfur cluster binding [GO:0051539]; metal ion binding [GO:0046872]		8	10	10	10	9	9
O08792	COE2_MOUSE	Transcription factor COE2 (Early B-cell factor 2) (EBF-2) (Metencephalon-mesencephalon-olfactory transcription factor 1) (MET-mesencephalon-olfactory TF1) (MET-mesencephalon-olfactory transcription factor 1) (Olf-1/EBF-like 3) (O/E-3) (OE-3)	Ebf2	0	1.33237	0.484439	0	adipose tissue development [GO:0060612]; brown fat cell differentiation [GO:0050873]; cell fate determination [GO:0001709]; positive regulation of cold-induced thermogenesis [GO:0120162]; positive regulation of DNA-templated transcription [GO:0045893]; positive regulation of transcription by RNA polymerase II [GO:0045944]; regulation of transcription by RNA polymerase II [GO:0006357]	nucleus [GO:0005634]	nucleus [GO:0005634]; chromatin binding [GO:0003682]; DNA binding [GO:0003677]; DNA-binding transcription activator activity, RNA polymerase II-specific [GO:0001228]; DNA-binding transcription factor activity, RNA polymerase II-specific [GO:0000981]; metal ion binding [GO:0046872]; RNA polymerase II cis-regulatory region sequence-specific DNA binding [GO:0000978]; adipose tissue development [GO:0…	chromatin binding [GO:0003682]; DNA binding [GO:0003677]; DNA-binding transcription activator activity, RNA polymerase II-specific [GO:0001228]; DNA-binding transcription factor activity, RNA polymerase II-specific [GO:0000981]; metal ion binding [GO:0046872]; RNA polymerase II cis-regulatory region sequence-specific DNA binding [GO:0000978]	SUBCELLULAR LOCATION: Nucleus {ECO:0000305}.	9	9	9	8	9	8
Q4PZA2	ECE1_MOUSE	Endothelin-converting enzyme 1 (ECE-1) (EC 3.4.24.71)	Ece1	1	0.848855	0.32126	0	axon guidance [GO:0007411]; axonogenesis involved in innervation [GO:0060385]; blood vessel diameter maintenance [GO:0097746]; bradykinin catabolic process [GO:0010815]; calcitonin catabolic process [GO:0010816]; ear development [GO:0043583]; embryonic digit morphogenesis [GO:0042733]; embryonic heart tube development [GO:0035050]; endothelin maturation [GO:0034959]; gene expression [GO:0010467];…	cell surface [GO:0009986]; early endosome [GO:0005769]; endosome [GO:0005768]; external side of plasma membrane [GO:0009897]; Golgi apparatus [GO:0005794]; membrane [GO:0016020]; perinuclear region of cytoplasm [GO:0048471]; plasma membrane [GO:0005886]; secretory granule [GO:0030141]; vesicle [GO:0031982]; Weibel-Palade body [GO:0033093]	cell surface [GO:0009986]; early endosome [GO:0005769]; endosome [GO:0005768]; external side of plasma membrane [GO:0009897]; Golgi apparatus [GO:0005794]; membrane [GO:0016020]; perinuclear region of cytoplasm [GO:0048471]; plasma membrane [GO:0005886]; secretory granule [GO:0030141]; vesicle [GO:0031982]; Weibel-Palade body [GO:0033093]; endopeptidase activity [GO:0004175]; identical protein bi…	endopeptidase activity [GO:0004175]; identical protein binding [GO:0042802]; metalloendopeptidase activity [GO:0004222]; protein homodimerization activity [GO:0042803]; zinc ion binding [GO:0008270]	SUBCELLULAR LOCATION: Cell membrane {ECO:0000250}; Single-pass type II membrane protein {ECO:0000250}.	24	20	23	20	18	17
Q8BL66	EEA1_MOUSE	Early endosome antigen 1	Eea1	0	0.778447	-1.7817	0	chemical synaptic transmission, postsynaptic [GO:0099565]; endocytosis [GO:0006897]; modulation by host of viral process [GO:0044788]; vesicle fusion [GO:0006906]	axonal spine [GO:0044308]; cytoplasmic vesicle [GO:0031410]; cytosol [GO:0005829]; early endosome [GO:0005769]; early endosome membrane [GO:0031901]; endosome [GO:0005768]; glutamatergic synapse [GO:0098978]; postsynapse [GO:0098794]; recycling endosome [GO:0055037]; Schaffer collateral - CA1 synapse [GO:0098685]; serine-pyruvate aminotransferase complex [GO:0005969]	axonal spine [GO:0044308]; cytoplasmic vesicle [GO:0031410]; cytosol [GO:0005829]; early endosome [GO:0005769]; early endosome membrane [GO:0031901]; endosome [GO:0005768]; glutamatergic synapse [GO:0098978]; postsynapse [GO:0098794]; recycling endosome [GO:0055037]; Schaffer collateral - CA1 synapse [GO:0098685]; serine-pyruvate aminotransferase complex [GO:0005969]; 1-phosphatidylinositol bindi…	1-phosphatidylinositol binding [GO:0005545]; GTP-dependent protein binding [GO:0030742]; metal ion binding [GO:0046872]; protein homodimerization activity [GO:0042803]	SUBCELLULAR LOCATION: Cytoplasm {ECO:0000250}. Early endosome membrane {ECO:0000250}; Peripheral membrane protein {ECO:0000250}.	1	2	2	1	0	0
Q91WK2	EIF3H_MOUSE	Eukaryotic translation initiation factor 3 subunit H (eIF3h) (Eukaryotic translation initiation factor 3 subunit 3) (eIF-3-gamma) (eIF3 p40 subunit)	Eif3h	0	0.00344568	0.00267283	0	formation of cytoplasmic translation initiation complex [GO:0001732]; negative regulation of proteasomal ubiquitin-dependent protein catabolic process [GO:0032435]; translational initiation [GO:0006413]	eukaryotic 43S preinitiation complex [GO:0016282]; eukaryotic 48S preinitiation complex [GO:0033290]; eukaryotic translation initiation factor 3 complex [GO:0005852]; eukaryotic translation initiation factor 3 complex, eIF3m [GO:0071541]; polysomal ribosome [GO:0042788]	eukaryotic 43S preinitiation complex [GO:0016282]; eukaryotic 48S preinitiation complex [GO:0033290]; eukaryotic translation initiation factor 3 complex [GO:0005852]; eukaryotic translation initiation factor 3 complex, eIF3m [GO:0071541]; polysomal ribosome [GO:0042788]; metal-dependent deubiquitinase activity [GO:0140492]; metallopeptidase activity [GO:0008237]; translation initiation factor act…	metal-dependent deubiquitinase activity [GO:0140492]; metallopeptidase activity [GO:0008237]; translation initiation factor activity [GO:0003743]	SUBCELLULAR LOCATION: Cytoplasm {ECO:0000255|HAMAP-Rule:MF_03007}.	2	2	3	2	2	1
P16406	AMPE_MOUSE	Glutamyl aminopeptidase (EAP) (EC 3.4.11.7) (Aminopeptidase A) (AP-A) (BP-1/6C3 antigen) (CD antigen CD249)	Enpep	1	0.0400408	-0.0234839	0	angiogenesis [GO:0001525]; cell migration [GO:0016477]; cell population proliferation [GO:0008283]; glomerulus development [GO:0032835]; peptide catabolic process [GO:0043171]; protein processing [GO:0016485]; proteolysis [GO:0006508]; regulation of blood pressure [GO:0008217]; regulation of systemic arterial blood pressure by renin-angiotensin [GO:0003081]; vascular endothelial cell proliferatio…	apical part of cell [GO:0045177]; apical plasma membrane [GO:0016324]; brush border [GO:0005903]; brush border membrane [GO:0031526]; cytoplasm [GO:0005737]; cytoplasmic vesicle [GO:0031410]; external side of plasma membrane [GO:0009897]; plasma membrane [GO:0005886]	apical part of cell [GO:0045177]; apical plasma membrane [GO:0016324]; brush border [GO:0005903]; brush border membrane [GO:0031526]; cytoplasm [GO:0005737]; cytoplasmic vesicle [GO:0031410]; external side of plasma membrane [GO:0009897]; plasma membrane [GO:0005886]; aminopeptidase activity [GO:0004177]; metalloaminopeptidase activity [GO:0070006]; peptidase activity [GO:0008233]; peptide bindin…	aminopeptidase activity [GO:0004177]; metalloaminopeptidase activity [GO:0070006]; peptidase activity [GO:0008233]; peptide binding [GO:0042277]; zinc ion binding [GO:0008270]	SUBCELLULAR LOCATION: Cell membrane {ECO:0000250|UniProtKB:Q07075}; Single-pass type II membrane protein.	21	21	21	17	18	14
G3X9S2	G3X9S2_MOUSE	Ectonucleotide pyrophosphatase/phosphodiesterase 1	Enpp1	1	1.03616	0.349178	0	immune response [GO:0006955]	extracellular region [GO:0005576]; membrane [GO:0016020]	extracellular region [GO:0005576]; membrane [GO:0016020]; hydrolase activity, acting on ester bonds [GO:0016788]; metal ion binding [GO:0046872]; nucleic acid binding [GO:0003676]; polysaccharide binding [GO:0030247]; scavenger receptor activity [GO:0005044]; immune response [GO:0006955]	hydrolase activity, acting on ester bonds [GO:0016788]; metal ion binding [GO:0046872]; nucleic acid binding [GO:0003676]; polysaccharide binding [GO:0030247]; scavenger receptor activity [GO:0005044]	SUBCELLULAR LOCATION: Secreted {ECO:0000256|ARBA:ARBA00004613}.	18	18	16	14	16	16
Q8BTJ4	ENPP4_MOUSE	Bis(5'-adenosyl)-triphosphatase enpp4 (EC 3.6.1.29) (AP3A hydrolase) (AP3Aase) (Ectonucleotide pyrophosphatase/phosphodiesterase family member 4) (E-NPP 4) (NPP-4)	Enpp4	1	0.328041	0.206785	0	blood coagulation [GO:0007596]; positive regulation of blood coagulation [GO:0030194]; purine ribonucleoside catabolic process [GO:0046130]	plasma membrane [GO:0005886]	plasma membrane [GO:0005886]; bis(5'-adenosyl)-triphosphatase activity [GO:0047710]; metal ion binding [GO:0046872]; blood coagulation [GO:0007596]; positive regulation of blood coagulation [GO:0030194]; purine ribonucleoside catabolic process [GO:0046130]	bis(5'-adenosyl)-triphosphatase activity [GO:0047710]; metal ion binding [GO:0046872]	SUBCELLULAR LOCATION: Cell membrane {ECO:0000250}; Single-pass type I membrane protein.	6	8	8	8	5	2
Q9EQH2	ERAP1_MOUSE	Endoplasmic reticulum aminopeptidase 1 (EC 3.4.11.-) (ARTS-1) (Adipocyte-derived leucine aminopeptidase) (A-LAP) (Aminopeptidase PILS) (Puromycin-insensitive leucyl-specific aminopeptidase) (PILS-AP) (VEGF-induced aminopeptidase)	Erap1	0	0.942566	0.332287	0	adaptive immune response [GO:0002250]; membrane protein ectodomain proteolysis [GO:0006509]; peptide catabolic process [GO:0043171]; positive regulation of angiogenesis [GO:0045766]; protein catabolic process [GO:0030163]; proteolysis [GO:0006508]	cytoplasm [GO:0005737]; endoplasmic reticulum lumen [GO:0005788]; endoplasmic reticulum membrane [GO:0005789]; extracellular region [GO:0005576]	cytoplasm [GO:0005737]; endoplasmic reticulum lumen [GO:0005788]; endoplasmic reticulum membrane [GO:0005789]; extracellular region [GO:0005576]; aminopeptidase activity [GO:0004177]; endopeptidase activity [GO:0004175]; interleukin-6 receptor binding [GO:0005138]; metalloaminopeptidase activity [GO:0070006]; metalloexopeptidase activity [GO:0008235]; peptidase activity [GO:0008233]; peptide bind…	aminopeptidase activity [GO:0004177]; endopeptidase activity [GO:0004175]; interleukin-6 receptor binding [GO:0005138]; metalloaminopeptidase activity [GO:0070006]; metalloexopeptidase activity [GO:0008235]; peptidase activity [GO:0008233]; peptide binding [GO:0042277]; tumor necrosis factor receptor binding [GO:0005164]; zinc ion binding [GO:0008270]	SUBCELLULAR LOCATION: Endoplasmic reticulum membrane {ECO:0000250}; Single-pass type II membrane protein {ECO:0000250}.	28	26	29	26	25	23
Q3UVK0	ERMP1_MOUSE	Endoplasmic reticulum metallopeptidase 1 (EC 3.4.-.-) (Felix-ina)	Ermp1	10	0.660474	0.302601	0	cellular response to oxidative stress [GO:0034599]; endoplasmic reticulum unfolded protein response [GO:0030968]; ovarian follicle development [GO:0001541]; proteolysis [GO:0006508]	endoplasmic reticulum membrane [GO:0005789]	endoplasmic reticulum membrane [GO:0005789]; metal ion binding [GO:0046872]; metalloexopeptidase activity [GO:0008235]; cellular response to oxidative stress [GO:0034599]; endoplasmic reticulum unfolded protein response [GO:0030968]; ovarian follicle development [GO:0001541]; proteolysis [GO:0006508]	metal ion binding [GO:0046872]; metalloexopeptidase activity [GO:0008235]	SUBCELLULAR LOCATION: Endoplasmic reticulum membrane {ECO:0000250|UniProtKB:Q6UPR8}; Multi-pass membrane protein {ECO:0000255}.	5	4	6	4	2	4
P16294	FA9_MOUSE	Coagulation factor IX (EC 3.4.21.22) (Christmas factor) [Cleaved into: Coagulation factor IXa light chain; Coagulation factor IXa heavy chain]	F9	0	1.59858	2.30845	0	blood coagulation [GO:0007596]; proteolysis [GO:0006508]; zymogen activation [GO:0031638]	extracellular space [GO:0005615]	extracellular space [GO:0005615]; calcium ion binding [GO:0005509]; endopeptidase activity [GO:0004175]; metal ion binding [GO:0046872]; peptidase activity [GO:0008233]; serine-type endopeptidase activity [GO:0004252]; blood coagulation [GO:0007596]; proteolysis [GO:0006508]; zymogen activation [GO:0031638]	calcium ion binding [GO:0005509]; endopeptidase activity [GO:0004175]; metal ion binding [GO:0046872]; peptidase activity [GO:0008233]; serine-type endopeptidase activity [GO:0004252]	SUBCELLULAR LOCATION: Secreted {ECO:0000250|UniProtKB:P00740}.	0	0	0	1	1	2
P35505	FAAA_MOUSE	Fumarylacetoacetase (FAA) (EC 3.7.1.2) (Beta-diketonase) (Fumarylacetoacetate hydrolase)	Fah	0	0.183497	0.175413	0	arginine catabolic process [GO:0006527]; homogentisate catabolic process [GO:1902000]; L-phenylalanine catabolic process [GO:0006559]; lipid metabolic process [GO:0006629]; tyrosine catabolic process [GO:0006572]		fumarylacetoacetase activity [GO:0004334]; metal ion binding [GO:0046872]; arginine catabolic process [GO:0006527]; homogentisate catabolic process [GO:1902000]; L-phenylalanine catabolic process [GO:0006559]; lipid metabolic process [GO:0006629]; tyrosine catabolic process [GO:0006572]	fumarylacetoacetase activity [GO:0004334]; metal ion binding [GO:0046872]		22	21	21	20	18	17
Q9QXC1	FETUB_MOUSE	Fetuin-B (Fetuin-like protein IRL685)	Fetub	0	0.537693	0.67831	0	binding of sperm to zona pellucida [GO:0007339]; negative regulation of endopeptidase activity [GO:0010951]; single fertilization [GO:0007338]	extracellular region [GO:0005576]; extracellular space [GO:0005615]	extracellular region [GO:0005576]; extracellular space [GO:0005615]; cysteine-type endopeptidase inhibitor activity [GO:0004869]; metalloendopeptidase inhibitor activity [GO:0008191]; binding of sperm to zona pellucida [GO:0007339]; negative regulation of endopeptidase activity [GO:0010951]; single fertilization [GO:0007338]	cysteine-type endopeptidase inhibitor activity [GO:0004869]; metalloendopeptidase inhibitor activity [GO:0008191]	SUBCELLULAR LOCATION: Secreted {ECO:0000305|PubMed:23562279}.	1	1	1	2	1	2
E9PV24	FIBA_MOUSE	Fibrinogen alpha chain [Cleaved into: Fibrinopeptide A; Fibrinogen alpha chain]	Fga	0	0.79476	-0.947341	0	adaptive immune response [GO:0002250]; blood coagulation [GO:0007596]; blood coagulation, common pathway [GO:0072377]; blood coagulation, fibrin clot formation [GO:0072378]; cell-matrix adhesion [GO:0007160]; fibrinolysis [GO:0042730]; induction of bacterial agglutination [GO:0043152]; innate immune response [GO:0045087]; negative regulation of endothelial cell apoptotic process [GO:2000352]; neg…	blood microparticle [GO:0072562]; cell cortex [GO:0005938]; cell surface [GO:0009986]; collagen-containing extracellular matrix [GO:0062023]; endoplasmic reticulum [GO:0005783]; external side of plasma membrane [GO:0009897]; extracellular space [GO:0005615]; fibrinogen complex [GO:0005577]; platelet alpha granule [GO:0031091]; synapse [GO:0045202]	blood microparticle [GO:0072562]; cell cortex [GO:0005938]; cell surface [GO:0009986]; collagen-containing extracellular matrix [GO:0062023]; endoplasmic reticulum [GO:0005783]; external side of plasma membrane [GO:0009897]; extracellular space [GO:0005615]; fibrinogen complex [GO:0005577]; platelet alpha granule [GO:0031091]; synapse [GO:0045202]; metal ion binding [GO:0046872]; signaling recept…	metal ion binding [GO:0046872]; signaling receptor binding [GO:0005102]; structural molecule activity [GO:0005198]	SUBCELLULAR LOCATION: Secreted {ECO:0000269|PubMed:7649481}.	3	3	1	0	1	0
Q8VDL9	GLIS2_MOUSE	Zinc finger protein GLIS2 (GLI-similar 2) (Neuronal Krueppel-like protein) (Zinc finger protein GLI5)	Glis2	0	1.56273	0.59331	0	cell differentiation involved in kidney development [GO:0061005]; central nervous system development [GO:0007417]; hematopoietic stem cell homeostasis [GO:0061484]; kidney development [GO:0001822]; negative regulation of DNA-binding transcription factor activity [GO:0043433]; negative regulation of DNA-templated transcription [GO:0045892]; negative regulation of smoothened signaling pathway [GO:0…	cytoplasm [GO:0005737]; non-motile cilium [GO:0097730]; nuclear speck [GO:0016607]; nucleoplasm [GO:0005654]; nucleus [GO:0005634]; transcription regulator complex [GO:0005667]	cytoplasm [GO:0005737]; non-motile cilium [GO:0097730]; nuclear speck [GO:0016607]; nucleoplasm [GO:0005654]; nucleus [GO:0005634]; transcription regulator complex [GO:0005667]; DNA binding [GO:0003677]; DNA-binding transcription activator activity, RNA polymerase II-specific [GO:0001228]; DNA-binding transcription factor activity [GO:0003700]; DNA-binding transcription factor activity, RNA polym…	DNA binding [GO:0003677]; DNA-binding transcription activator activity, RNA polymerase II-specific [GO:0001228]; DNA-binding transcription factor activity [GO:0003700]; DNA-binding transcription factor activity, RNA polymerase II-specific [GO:0000981]; metal ion binding [GO:0046872]; RNA polymerase II cis-regulatory region sequence-specific DNA binding [GO:0000978]; RNA polymerase II transcriptio…	SUBCELLULAR LOCATION: Nucleus speckle. Cytoplasm.	24	24	24	24	23	23
P02089	HBB2_MOUSE	Hemoglobin subunit beta-2 (Beta-2-globin) (Hemoglobin beta-2 chain) (Hemoglobin beta-minor chain)	Hbb-b2	0	0.545661	-0.20064	0	carbon dioxide transport [GO:0015670]; cellular oxidant detoxification [GO:0098869]; erythrocyte development [GO:0048821]; hydrogen peroxide catabolic process [GO:0042744]; myeloid cell differentiation [GO:0030099]; nitric oxide transport [GO:0030185]; oxygen transport [GO:0015671]; positive regulation of myeloid cell differentiation [GO:0045639]; regulation of erythrocyte differentiation [GO:004…	extracellular space [GO:0005615]; haptoglobin-hemoglobin complex [GO:0031838]; hemoglobin complex [GO:0005833]	extracellular space [GO:0005615]; haptoglobin-hemoglobin complex [GO:0031838]; hemoglobin complex [GO:0005833]; heme binding [GO:0020037]; hemoglobin alpha binding [GO:0031721]; hemoglobin beta binding [GO:0031722]; hemoglobin binding [GO:0030492]; metal ion binding [GO:0046872]; organic acid binding [GO:0043177]; oxygen binding [GO:0019825]; oxygen carrier activity [GO:0005344]; protein-containi…	heme binding [GO:0020037]; hemoglobin alpha binding [GO:0031721]; hemoglobin beta binding [GO:0031722]; hemoglobin binding [GO:0030492]; metal ion binding [GO:0046872]; organic acid binding [GO:0043177]; oxygen binding [GO:0019825]; oxygen carrier activity [GO:0005344]; protein-containing complex binding [GO:0044877]		6	6	6	5	5	5
A8DUK4	A8DUK4_MOUSE	Beta-globin (Globin a1) (Hemoglobin, beta adult s chain) (Hemoglobin, beta adult t chain)	Hbb-bs	0	0.448446	0.221903	0	cellular oxidant detoxification [GO:0098869]; hydrogen peroxide catabolic process [GO:0042744]	extracellular space [GO:0005615]; haptoglobin-hemoglobin complex [GO:0031838]; hemoglobin complex [GO:0005833]	extracellular space [GO:0005615]; haptoglobin-hemoglobin complex [GO:0031838]; hemoglobin complex [GO:0005833]; heme binding [GO:0020037]; hemoglobin alpha binding [GO:0031721]; hemoglobin beta binding [GO:0031722]; hemoglobin binding [GO:0030492]; metal ion binding [GO:0046872]; organic acid binding [GO:0043177]; oxygen binding [GO:0019825]; oxygen carrier activity [GO:0005344]; protein-containi…	heme binding [GO:0020037]; hemoglobin alpha binding [GO:0031721]; hemoglobin beta binding [GO:0031722]; hemoglobin binding [GO:0030492]; metal ion binding [GO:0046872]; organic acid binding [GO:0043177]; oxygen binding [GO:0019825]; oxygen carrier activity [GO:0005344]; protein-containing complex binding [GO:0044877]		2	2	2	2	2	2
P53702	CCHL_MOUSE	Holocytochrome c-type synthase (EC 4.4.1.17) (Cytochrome c-type heme lyase) (CCHL)	Hccs	0	0.836765	0.455996	0		cytosol [GO:0005829]; membrane [GO:0016020]; mitochondrial inner membrane [GO:0005743]; mitochondrion [GO:0005739]	cytosol [GO:0005829]; membrane [GO:0016020]; mitochondrial inner membrane [GO:0005743]; mitochondrion [GO:0005739]; heme binding [GO:0020037]; holocytochrome-c synthase activity [GO:0004408]; metal ion binding [GO:0046872]	heme binding [GO:0020037]; holocytochrome-c synthase activity [GO:0004408]; metal ion binding [GO:0046872]	SUBCELLULAR LOCATION: Mitochondrion inner membrane {ECO:0000250|UniProtKB:P53701}. Membrane {ECO:0000250|UniProtKB:P53701}; Lipid-anchor {ECO:0000250|UniProtKB:P53701}.	2	2	2	4	2	3
P14901	HMOX1_MOUSE	Heme oxygenase 1 (HO-1) (EC 1.14.14.18) (P32 protein) [Cleaved into: Heme oxygenase 1 soluble form]	Hmox1	1	0.797919	0.606148	0	angiogenesis [GO:0001525]; cellular response to arsenic-containing substance [GO:0071243]; cellular response to cadmium ion [GO:0071276]; cellular response to cisplatin [GO:0072719]; cellular response to heat [GO:0034605]; cellular response to hypoxia [GO:0071456]; epithelial cell apoptotic process [GO:1904019]; erythrocyte homeostasis [GO:0034101]; heme catabolic process [GO:0042167]; heme metab…	caveola [GO:0005901]; endoplasmic reticulum [GO:0005783]; endoplasmic reticulum membrane [GO:0005789]; nucleus [GO:0005634]; perinuclear region of cytoplasm [GO:0048471]	caveola [GO:0005901]; endoplasmic reticulum [GO:0005783]; endoplasmic reticulum membrane [GO:0005789]; nucleus [GO:0005634]; perinuclear region of cytoplasm [GO:0048471]; arachidonic acid omega-hydroxylase activity [GO:0052869]; enzyme binding [GO:0019899]; heme binding [GO:0020037]; heme oxygenase (decyclizing) activity [GO:0004392]; identical protein binding [GO:0042802]; metal ion binding [GO:…	arachidonic acid omega-hydroxylase activity [GO:0052869]; enzyme binding [GO:0019899]; heme binding [GO:0020037]; heme oxygenase (decyclizing) activity [GO:0004392]; identical protein binding [GO:0042802]; metal ion binding [GO:0046872]; phospholipase D activity [GO:0004630]; protein homodimerization activity [GO:0042803]; structural molecule activity [GO:0005198]	SUBCELLULAR LOCATION: Endoplasmic reticulum membrane {ECO:0000250|UniProtKB:P09601}; Single-pass type IV membrane protein {ECO:0000255}; Cytoplasmic side {ECO:0000250|UniProtKB:P09601}.	1	1	1	1	1	3
Q91X72	HEMO_MOUSE	Hemopexin	Hpx	0	0.333431	0.142154	0	heme metabolic process [GO:0042168]; hemoglobin metabolic process [GO:0020027]; intracellular iron ion homeostasis [GO:0006879]; positive regulation of humoral immune response mediated by circulating immunoglobulin [GO:0002925]; positive regulation of immunoglobulin production [GO:0002639]; positive regulation of response to type II interferon [GO:0060332]; positive regulation of type II interfer…	extracellular space [GO:0005615]	extracellular space [GO:0005615]; heme binding [GO:0020037]; heme transmembrane transporter activity [GO:0015232]; metal ion binding [GO:0046872]; heme metabolic process [GO:0042168]; hemoglobin metabolic process [GO:0020027]; intracellular iron ion homeostasis [GO:0006879]; positive regulation of humoral immune response mediated by circulating immunoglobulin [GO:0002925]; positive regulation of …	heme binding [GO:0020037]; heme transmembrane transporter activity [GO:0015232]; metal ion binding [GO:0046872]	SUBCELLULAR LOCATION: Secreted.	17	17	17	10	12	10
Q61645	HAIR_MOUSE	Lysine-specific demethylase hairless (EC 1.14.11.65) ([histone H3]-dimethyl-L-lysine(9) demethylase hairless)	Hr	0	0.718871	0.222348	0	negative regulation of DNA-templated transcription [GO:0045892]; regulation of transcription by RNA polymerase II [GO:0006357]	chromatin [GO:0000785]; histone deacetylase complex [GO:0000118]; nuclear body [GO:0016604]; nucleoplasm [GO:0005654]	chromatin [GO:0000785]; histone deacetylase complex [GO:0000118]; nuclear body [GO:0016604]; nucleoplasm [GO:0005654]; chromatin DNA binding [GO:0031490]; histone deacetylase binding [GO:0042826]; histone H3K9 demethylase activity [GO:0032454]; histone H3K9me/H3K9me2 demethylase activity [GO:0140683]; metal ion binding [GO:0046872]; nuclear thyroid hormone receptor binding [GO:0046966]; nuclear v…	chromatin DNA binding [GO:0031490]; histone deacetylase binding [GO:0042826]; histone H3K9 demethylase activity [GO:0032454]; histone H3K9me/H3K9me2 demethylase activity [GO:0140683]; metal ion binding [GO:0046872]; nuclear thyroid hormone receptor binding [GO:0046966]; nuclear vitamin D receptor binding [GO:0042809]; protein-containing complex binding [GO:0044877]; transcription coregulator acti…	SUBCELLULAR LOCATION: Nucleus.	12	15	17	14	11	8
Q9ESB3	HRG_MOUSE	Histidine-rich glycoprotein (Histidine-proline-rich glycoprotein) (HPRG)	Hrg	0	1.3182	0.474482	0	angiogenesis [GO:0001525]; antimicrobial humoral immune response mediated by antimicrobial peptide [GO:0061844]; chemotaxis [GO:0006935]; cytolysis by host of symbiont cells [GO:0051838]; defense response to fungus [GO:0050832]; fibrinolysis [GO:0042730]; heme export [GO:0097037]; heme transport [GO:0015886]; negative regulation of angiogenesis [GO:0016525]; negative regulation of blood vessel en…	cell surface [GO:0009986]; collagen-containing extracellular matrix [GO:0062023]; endolysosome [GO:0036019]; extracellular region [GO:0005576]; phagolysosome membrane [GO:0061474]; vesicle [GO:0031982]	cell surface [GO:0009986]; collagen-containing extracellular matrix [GO:0062023]; endolysosome [GO:0036019]; extracellular region [GO:0005576]; phagolysosome membrane [GO:0061474]; vesicle [GO:0031982]; cysteine-type endopeptidase inhibitor activity [GO:0004869]; heme binding [GO:0020037]; heparan sulfate proteoglycan binding [GO:0043395]; heparin binding [GO:0008201]; immunoglobulin binding [GO:…	cysteine-type endopeptidase inhibitor activity [GO:0004869]; heme binding [GO:0020037]; heparan sulfate proteoglycan binding [GO:0043395]; heparin binding [GO:0008201]; immunoglobulin binding [GO:0019865]; metal ion binding [GO:0046872]; serine-type endopeptidase inhibitor activity [GO:0004867]; signaling receptor binding [GO:0005102]; zinc ion binding [GO:0008270]	SUBCELLULAR LOCATION: Secreted.	10	11	12	7	8	8
P24547	IMDH2_MOUSE	Inosine-5'-monophosphate dehydrogenase 2 (IMP dehydrogenase 2) (IMPD 2) (IMPDH 2) (EC 1.1.1.205) (IMPDH-II)	Impdh2	0	1.3748	1.71165	0	'de novo' XMP biosynthetic process [GO:0097294]; cellular response to interleukin-4 [GO:0071353]; circadian rhythm [GO:0007623]; GMP biosynthetic process [GO:0006177]; GMP salvage [GO:0032263]; GTP biosynthetic process [GO:0006183]; lymphocyte proliferation [GO:0046651]; purine nucleotide biosynthetic process [GO:0006164]	cytoplasm [GO:0005737]; cytosol [GO:0005829]; nucleus [GO:0005634]	cytoplasm [GO:0005737]; cytosol [GO:0005829]; nucleus [GO:0005634]; DNA binding [GO:0003677]; identical protein binding [GO:0042802]; IMP dehydrogenase activity [GO:0003938]; metal ion binding [GO:0046872]; nucleotide binding [GO:0000166]; RNA binding [GO:0003723]; 'de novo' XMP biosynthetic process [GO:0097294]; cellular response to interleukin-4 [GO:0071353]; circadian rhythm [GO:0007623]; GMP …	DNA binding [GO:0003677]; identical protein binding [GO:0042802]; IMP dehydrogenase activity [GO:0003938]; metal ion binding [GO:0046872]; nucleotide binding [GO:0000166]; RNA binding [GO:0003723]	SUBCELLULAR LOCATION: Cytoplasm {ECO:0000250|UniProtKB:P12268}. Nucleus {ECO:0000250|UniProtKB:P12268}. Cytoplasm, cytosol {ECO:0000250|UniProtKB:P12268}. Note=Can form fiber-like subcellular structures termed 'cytoophidia' in response to intracellular guanine-nucleotide depletion. {ECO:0000250|UniProtKB:P12268}.	1	5	5	7	6	7
Q3V3R4	ITA1_MOUSE	Integrin alpha-1 (CD49 antigen-like family member A) (Laminin and collagen receptor) (VLA-1) (CD antigen CD49a)	Itga1	1	0.562605	0.195192	0	cell adhesion [GO:0007155]; cell adhesion mediated by integrin [GO:0033627]; cell chemotaxis [GO:0060326]; cell-cell adhesion [GO:0098609]; cell-matrix adhesion [GO:0007160]; cellular extravasation [GO:0045123]; integrin-mediated signaling pathway [GO:0007229]; negative regulation of cell population proliferation [GO:0008285]; negative regulation of epidermal growth factor receptor signaling path…	acrosomal vesicle [GO:0001669]; basal part of cell [GO:0045178]; cell surface [GO:0009986]; external side of plasma membrane [GO:0009897]; focal adhesion [GO:0005925]; integrin alpha1-beta1 complex [GO:0034665]; integrin complex [GO:0008305]; perikaryon [GO:0043204]; plasma membrane [GO:0005886]	acrosomal vesicle [GO:0001669]; basal part of cell [GO:0045178]; cell surface [GO:0009986]; external side of plasma membrane [GO:0009897]; focal adhesion [GO:0005925]; integrin alpha1-beta1 complex [GO:0034665]; integrin complex [GO:0008305]; perikaryon [GO:0043204]; plasma membrane [GO:0005886]; collagen binding [GO:0005518]; collagen binding involved in cell-matrix adhesion [GO:0098639]; integr…	collagen binding [GO:0005518]; collagen binding involved in cell-matrix adhesion [GO:0098639]; integrin binding [GO:0005178]; metal ion binding [GO:0046872]; protein phosphatase binding [GO:0019903]; signaling receptor binding [GO:0005102]	SUBCELLULAR LOCATION: Membrane {ECO:0000250}; Single-pass type I membrane protein {ECO:0000250}.	17	14	15	17	16	16
Q9QUM0	ITA2B_MOUSE	Integrin alpha-IIb (GPalpha IIb) (GPIIb) (Platelet membrane glycoprotein IIb) (CD antigen CD41) [Cleaved into: Integrin alpha-IIb heavy chain; Integrin alpha-IIb light chain]	Itga2b	1	0.476705	0.292062	0	angiogenesis [GO:0001525]; cell adhesion mediated by integrin [GO:0033627]; cell-cell adhesion [GO:0098609]; cell-matrix adhesion [GO:0007160]; integrin-mediated signaling pathway [GO:0007229]; positive regulation of leukocyte migration [GO:0002687]	cell surface [GO:0009986]; external side of plasma membrane [GO:0009897]; extracellular exosome [GO:0070062]; focal adhesion [GO:0005925]; integrin complex [GO:0008305]; plasma membrane [GO:0005886]	cell surface [GO:0009986]; external side of plasma membrane [GO:0009897]; extracellular exosome [GO:0070062]; focal adhesion [GO:0005925]; integrin complex [GO:0008305]; plasma membrane [GO:0005886]; extracellular matrix binding [GO:0050840]; fibrinogen binding [GO:0070051]; identical protein binding [GO:0042802]; integrin binding [GO:0005178]; metal ion binding [GO:0046872]; molecular adaptor ac…	extracellular matrix binding [GO:0050840]; fibrinogen binding [GO:0070051]; identical protein binding [GO:0042802]; integrin binding [GO:0005178]; metal ion binding [GO:0046872]; molecular adaptor activity [GO:0060090]	SUBCELLULAR LOCATION: Membrane; Single-pass type I membrane protein.	5	3	5	4	3	4
B8JK39	ITA9_MOUSE	Integrin alpha-9	Itga9	1	0.0217126	-0.0276737	0	cell adhesion [GO:0007155]; cell adhesion mediated by integrin [GO:0033627]; cell-cell adhesion [GO:0098609]; cell-matrix adhesion [GO:0007160]; integrin-mediated signaling pathway [GO:0007229]; negative regulation of vasoconstriction [GO:0045906]; neutrophil chemotaxis [GO:0030593]	basal plasma membrane [GO:0009925]; external side of plasma membrane [GO:0009897]; integrin alpha9-beta1 complex [GO:0034679]; integrin complex [GO:0008305]	basal plasma membrane [GO:0009925]; external side of plasma membrane [GO:0009897]; integrin alpha9-beta1 complex [GO:0034679]; integrin complex [GO:0008305]; collagen binding [GO:0005518]; integrin binding [GO:0005178]; integrin binding involved in cell-matrix adhesion [GO:0098640]; laminin binding [GO:0043236]; metal ion binding [GO:0046872]; cell adhesion [GO:0007155]; cell adhesion mediated by…	collagen binding [GO:0005518]; integrin binding [GO:0005178]; integrin binding involved in cell-matrix adhesion [GO:0098640]; laminin binding [GO:0043236]; metal ion binding [GO:0046872]	SUBCELLULAR LOCATION: Membrane {ECO:0000255}; Single-pass type I membrane protein {ECO:0000255}.	4	5	4	3	2	1
E9QNL8	ITAL_MOUSE	Integrin alpha-L (CD11 antigen-like family member A) (Leukocyte adhesion glycoprotein LFA-1 alpha chain) (LFA-1A) (Leukocyte function-associated molecule 1 alpha chain) (Lymphocyte antigen 15) (Ly-15) (CD antigen CD11a)	Itgal	1	1.17493	0.529265	0	activated T cell proliferation [GO:0050798]; calcium-mediated signaling [GO:0019722]; cell adhesion mediated by integrin [GO:0033627]; cell surface receptor signaling pathway [GO:0007166]; cell-cell adhesion [GO:0098609]; cell-matrix adhesion [GO:0007160]; heterophilic cell-cell adhesion via plasma membrane cell adhesion molecules [GO:0007157]; integrin-mediated signaling pathway [GO:0007229]; le…	cell surface [GO:0009986]; cell-cell junction [GO:0005911]; external side of plasma membrane [GO:0009897]; immunological synapse [GO:0001772]; integrin alphaL-beta2 complex [GO:0034687]; integrin complex [GO:0008305]	cell surface [GO:0009986]; cell-cell junction [GO:0005911]; external side of plasma membrane [GO:0009897]; immunological synapse [GO:0001772]; integrin alphaL-beta2 complex [GO:0034687]; integrin complex [GO:0008305]; cell adhesion molecule binding [GO:0050839]; ICAM-3 receptor activity [GO:0030369]; integrin binding [GO:0005178]; metal ion binding [GO:0046872]; protein-containing complex binding…	cell adhesion molecule binding [GO:0050839]; ICAM-3 receptor activity [GO:0030369]; integrin binding [GO:0005178]; metal ion binding [GO:0046872]; protein-containing complex binding [GO:0044877]	SUBCELLULAR LOCATION: Cell membrane {ECO:0000250|UniProtKB:P20701}; Single-pass type I membrane protein {ECO:0000255}.	2	5	4	4	4	2
P43406	ITAV_MOUSE	Integrin alpha-V (Vitronectin receptor subunit alpha) (CD antigen CD51) [Cleaved into: Integrin alpha-V heavy chain; Integrin alpha-V light chain]	Itgav	1	0.661443	0.440802	0	angiogenesis [GO:0001525]; apolipoprotein A-I-mediated signaling pathway [GO:0038027]; apoptotic cell clearance [GO:0043277]; blood vessel development [GO:0001568]; calcium ion transmembrane transport [GO:0070588]; cell adhesion [GO:0007155]; cell adhesion mediated by integrin [GO:0033627]; cell migration [GO:0016477]; cell-cell adhesion [GO:0098609]; cell-matrix adhesion [GO:0007160]; cell-subst…	alphav-beta3 integrin-HMGB1 complex [GO:0035868]; alphav-beta3 integrin-IGF-1-IGF1R complex [GO:0035867]; cell surface [GO:0009986]; cytosol [GO:0005829]; external side of plasma membrane [GO:0009897]; filopodium membrane [GO:0031527]; focal adhesion [GO:0005925]; integrin alphav-beta1 complex [GO:0034682]; integrin alphav-beta3 complex [GO:0034683]; integrin alphav-beta5 complex [GO:0034684]; in…	alphav-beta3 integrin-HMGB1 complex [GO:0035868]; alphav-beta3 integrin-IGF-1-IGF1R complex [GO:0035867]; cell surface [GO:0009986]; cytosol [GO:0005829]; external side of plasma membrane [GO:0009897]; filopodium membrane [GO:0031527]; focal adhesion [GO:0005925]; integrin alphav-beta1 complex [GO:0034682]; integrin alphav-beta3 complex [GO:0034683]; integrin alphav-beta5 complex [GO:0034684]; in…	C-X3-C chemokine binding [GO:0019960]; extracellular matrix binding [GO:0050840]; extracellular matrix protein binding [GO:1990430]; fibroblast growth factor binding [GO:0017134]; fibronectin binding [GO:0001968]; insulin-like growth factor I binding [GO:0031994]; integrin binding [GO:0005178]; metal ion binding [GO:0046872]; neuregulin binding [GO:0038132]; protease binding [GO:0002020]; signali…	SUBCELLULAR LOCATION: Cell membrane; Single-pass type I membrane protein. Cell junction, focal adhesion {ECO:0000250|UniProtKB:P06756}.	12	8	15	12	10	10
O54890	ITB3_MOUSE	Integrin beta-3 (Platelet membrane glycoprotein IIIa) (GPIIIa) (CD antigen CD61)	Itgb3	1	0.264637	-0.213336	0	apolipoprotein A-I-mediated signaling pathway [GO:0038027]; apoptotic cell clearance [GO:0043277]; blood coagulation, fibrin clot formation [GO:0072378]; cell adhesion mediated by integrin [GO:0033627]; cell projection morphogenesis [GO:0048858]; cell-matrix adhesion [GO:0007160]; cell-substrate adhesion [GO:0031589]; cell-substrate junction assembly [GO:0007044]; cellular response to insulin-lik…	alpha9-beta1 integrin-ADAM8 complex [GO:0071133]; alphav-beta3 integrin-HMGB1 complex [GO:0035868]; alphav-beta3 integrin-IGF-1-IGF1R complex [GO:0035867]; alphav-beta3 integrin-PKCalpha complex [GO:0035866]; apical plasma membrane [GO:0016324]; cell surface [GO:0009986]; cell-cell junction [GO:0005911]; external side of plasma membrane [GO:0009897]; filopodium membrane [GO:0031527]; focal adhesi…	alpha9-beta1 integrin-ADAM8 complex [GO:0071133]; alphav-beta3 integrin-HMGB1 complex [GO:0035868]; alphav-beta3 integrin-IGF-1-IGF1R complex [GO:0035867]; alphav-beta3 integrin-PKCalpha complex [GO:0035866]; apical plasma membrane [GO:0016324]; cell surface [GO:0009986]; cell-cell junction [GO:0005911]; external side of plasma membrane [GO:0009897]; filopodium membrane [GO:0031527]; focal adhesi…	C-X3-C chemokine binding [GO:0019960]; cell adhesion molecule binding [GO:0050839]; enzyme binding [GO:0019899]; extracellular matrix binding [GO:0050840]; fibrinogen binding [GO:0070051]; fibroblast growth factor binding [GO:0017134]; fibronectin binding [GO:0001968]; identical protein binding [GO:0042802]; insulin-like growth factor I binding [GO:0031994]; integrin binding [GO:0005178]; metal i…	SUBCELLULAR LOCATION: Cell membrane {ECO:0000250|UniProtKB:P05106}; Single-pass type I membrane protein {ECO:0000250|UniProtKB:P05106}. Cell projection, lamellipodium membrane {ECO:0000250|UniProtKB:P05106}. Cell junction, focal adhesion {ECO:0000269|PubMed:29038237}. Postsynaptic cell membrane {ECO:0000269|PubMed:18549786}; Single-pass type I membrane protein {ECO:0000305}. Synapse {ECO:0000269|…	3	4	2	4	2	2
Q9CPY7	AMPL_MOUSE	Cytosol aminopeptidase (EC 3.4.11.1) (Cysteinylglycine-S-conjugate dipeptidase) (EC 3.4.13.23) (Leucine aminopeptidase 3) (LAP-3) (Leucyl aminopeptidase) (Peptidase S) (Proline aminopeptidase) (EC 3.4.11.5) (Prolyl aminopeptidase)	Lap3	0	0.15493	0.0796941	0	proteolysis [GO:0006508]	cytoplasm [GO:0005737]; mitochondrion [GO:0005739]; trans-Golgi network [GO:0005802]	cytoplasm [GO:0005737]; mitochondrion [GO:0005739]; trans-Golgi network [GO:0005802]; carboxypeptidase activity [GO:0004180]; manganese ion binding [GO:0030145]; metalloaminopeptidase activity [GO:0070006]; peptidase activity [GO:0008233]; proteolysis [GO:0006508]	carboxypeptidase activity [GO:0004180]; manganese ion binding [GO:0030145]; metalloaminopeptidase activity [GO:0070006]; peptidase activity [GO:0008233]	SUBCELLULAR LOCATION: Cytoplasm {ECO:0000250|UniProtKB:Q68FS4}.	23	25	24	21	23	20
Q9Z2I0	LETM1_MOUSE	Mitochondrial proton/calcium exchanger protein (Electroneutral mitochondrial K(+)/H(+)exchanger) (KHE) (Leucine zipper-EF-hand-containing transmembrane protein 1)	Letm1	1	1.15824	0.550452	0	calcium export from the mitochondrion [GO:0099093]; cristae formation [GO:0042407]; inner mitochondrial membrane organization [GO:0007007]; mitochondrial calcium ion homeostasis [GO:0051560]; mitochondrial calcium ion transmembrane transport [GO:0006851]; mitochondrial potassium ion transmembrane transport [GO:0140141]; negative regulation of mitochondrial calcium ion concentration [GO:0051562]; …	mitochondrial inner membrane [GO:0005743]; mitochondrion [GO:0005739]	mitochondrial inner membrane [GO:0005743]; mitochondrion [GO:0005739]; calcium:proton antiporter activity [GO:0015369]; metal ion binding [GO:0046872]; ribosome binding [GO:0043022]; calcium export from the mitochondrion [GO:0099093]; cristae formation [GO:0042407]; inner mitochondrial membrane organization [GO:0007007]; mitochondrial calcium ion homeostasis [GO:0051560]; mitochondrial calcium io…	calcium:proton antiporter activity [GO:0015369]; metal ion binding [GO:0046872]; ribosome binding [GO:0043022]	SUBCELLULAR LOCATION: Mitochondrion inner membrane {ECO:0000269|PubMed:27669901}; Single-pass membrane protein {ECO:0000255}.	15	14	16	14	13	12
Q9D7I5	LHPP_MOUSE	Phospholysine phosphohistidine inorganic pyrophosphate phosphatase (EC 3.1.3.-) (EC 3.6.1.1)	Lhpp	0	0.63156	0.549646	0	dephosphorylation [GO:0016311]; phosphate-containing compound metabolic process [GO:0006796]	cytosol [GO:0005829]; nuclear speck [GO:0016607]; nucleus [GO:0005634]	cytosol [GO:0005829]; nuclear speck [GO:0016607]; nucleus [GO:0005634]; inorganic diphosphate phosphatase activity [GO:0004427]; metal ion binding [GO:0046872]; phosphatase activity [GO:0016791]; protein homodimerization activity [GO:0042803]; dephosphorylation [GO:0016311]; phosphate-containing compound metabolic process [GO:0006796]	inorganic diphosphate phosphatase activity [GO:0004427]; metal ion binding [GO:0046872]; phosphatase activity [GO:0016791]; protein homodimerization activity [GO:0042803]	SUBCELLULAR LOCATION: Cytoplasm {ECO:0000250}. Nucleus {ECO:0000250}.	0	1	2	1	2	1
Q3TYU0	Q3TYU0_MOUSE	Hepatic triacylglycerol lipase (EC 3.1.1.3) (EC 3.1.1.32) (EC 3.1.1.5) (Lipase member C) (Lysophospholipase) (Phospholipase A1)	Lipc	0	0.459632	0.590648	0	lipid metabolic process [GO:0006629]	high-density lipoprotein particle [GO:0034364]	high-density lipoprotein particle [GO:0034364]; 1-acyl-2-lysophosphatidylserine acylhydrolase activity [GO:0052740]; heparin binding [GO:0008201]; lysophospholipase activity [GO:0004622]; metal ion binding [GO:0046872]; phosphatidyl phospholipase B activity [GO:0102545]; phosphatidylserine 1-acylhydrolase activity [GO:0052739]; phospholipase A1 activity [GO:0008970]; triglyceride lipase activity …	1-acyl-2-lysophosphatidylserine acylhydrolase activity [GO:0052740]; heparin binding [GO:0008201]; lysophospholipase activity [GO:0004622]; metal ion binding [GO:0046872]; phosphatidyl phospholipase B activity [GO:0102545]; phosphatidylserine 1-acylhydrolase activity [GO:0052739]; phospholipase A1 activity [GO:0008970]; triglyceride lipase activity [GO:0004806]	SUBCELLULAR LOCATION: Secreted {ECO:0000256|ARBA:ARBA00004613}.	3	1	1	2	2	1
Q9D0F3	LMAN1_MOUSE	Protein ERGIC-53 (ER-Golgi intermediate compartment 53 kDa protein) (Lectin mannose-binding 1) (p58)	Lman1	1	0.536162	0.190077	0	endoplasmic reticulum organization [GO:0007029]; endoplasmic reticulum to Golgi vesicle-mediated transport [GO:0006888]; Golgi organization [GO:0007030]; positive regulation of organelle organization [GO:0010638]; protein transport [GO:0015031]	collagen-containing extracellular matrix [GO:0062023]; COPII-coated ER to Golgi transport vesicle [GO:0030134]; endoplasmic reticulum [GO:0005783]; endoplasmic reticulum membrane [GO:0005789]; endoplasmic reticulum-Golgi intermediate compartment [GO:0005793]; endoplasmic reticulum-Golgi intermediate compartment membrane [GO:0033116]; Golgi apparatus [GO:0005794]; Golgi membrane [GO:0000139]; sarc…	collagen-containing extracellular matrix [GO:0062023]; COPII-coated ER to Golgi transport vesicle [GO:0030134]; endoplasmic reticulum [GO:0005783]; endoplasmic reticulum membrane [GO:0005789]; endoplasmic reticulum-Golgi intermediate compartment [GO:0005793]; endoplasmic reticulum-Golgi intermediate compartment membrane [GO:0033116]; Golgi apparatus [GO:0005794]; Golgi membrane [GO:0000139]; sarc…	identical protein binding [GO:0042802]; mannose binding [GO:0005537]; metal ion binding [GO:0046872]	SUBCELLULAR LOCATION: Endoplasmic reticulum-Golgi intermediate compartment membrane {ECO:0000250}; Single-pass type I membrane protein {ECO:0000250}. Golgi apparatus membrane {ECO:0000250}; Single-pass membrane protein {ECO:0000250}. Endoplasmic reticulum membrane {ECO:0000250}; Single-pass membrane protein {ECO:0000250}.	20	21	22	23	21	21
Q9DBH5	LMAN2_MOUSE	Vesicular integral-membrane protein VIP36 (Lectin mannose-binding 2) (Vesicular integral-membrane protein 36) (VIP36)	Lman2	1	0.245808	-0.138575	0	endoplasmic reticulum to Golgi vesicle-mediated transport [GO:0006888]; positive regulation of phagocytosis [GO:0050766]; protein transport [GO:0015031]; retrograde vesicle-mediated transport, Golgi to endoplasmic reticulum [GO:0006890]	cell surface [GO:0009986]; COPII-coated ER to Golgi transport vesicle [GO:0030134]; endoplasmic reticulum membrane [GO:0005789]; endoplasmic reticulum-Golgi intermediate compartment [GO:0005793]; extracellular space [GO:0005615]; Golgi apparatus [GO:0005794]; Golgi membrane [GO:0000139]; plasma membrane [GO:0005886]	cell surface [GO:0009986]; COPII-coated ER to Golgi transport vesicle [GO:0030134]; endoplasmic reticulum membrane [GO:0005789]; endoplasmic reticulum-Golgi intermediate compartment [GO:0005793]; extracellular space [GO:0005615]; Golgi apparatus [GO:0005794]; Golgi membrane [GO:0000139]; plasma membrane [GO:0005886]; carbohydrate binding [GO:0030246]; heat shock protein binding [GO:0031072]; mann…	carbohydrate binding [GO:0030246]; heat shock protein binding [GO:0031072]; mannose binding [GO:0005537]; metal ion binding [GO:0046872]	SUBCELLULAR LOCATION: Golgi apparatus membrane {ECO:0000250}; Single-pass type I membrane protein {ECO:0000250}.	14	14	14	16	14	14
Q8C129	LCAP_MOUSE	Leucyl-cystinyl aminopeptidase (Cystinyl aminopeptidase) (EC 3.4.11.3) (Oxytocinase) (OTase)	Lnpep	1	1.0517	0.309882	0	negative regulation of cold-induced thermogenesis [GO:0120163]; neuropeptide catabolic process [GO:0010813]; peptide catabolic process [GO:0043171]; positive regulation of blood pressure [GO:0045777]; protein catabolic process [GO:0030163]; proteolysis [GO:0006508]; regulation of blood pressure [GO:0008217]; regulation of long-term neuronal synaptic plasticity [GO:0048169]; response to hormone [G…	cell surface [GO:0009986]; cytoplasm [GO:0005737]; cytoplasmic vesicle membrane [GO:0030659]; insulin-responsive compartment [GO:0032593]; membrane [GO:0016020]; neuronal cell body [GO:0043025]; perinuclear region of cytoplasm [GO:0048471]; plasma membrane [GO:0005886]; vesicle [GO:0031982]	cell surface [GO:0009986]; cytoplasm [GO:0005737]; cytoplasmic vesicle membrane [GO:0030659]; insulin-responsive compartment [GO:0032593]; membrane [GO:0016020]; neuronal cell body [GO:0043025]; perinuclear region of cytoplasm [GO:0048471]; plasma membrane [GO:0005886]; vesicle [GO:0031982]; aminopeptidase activity [GO:0004177]; metalloaminopeptidase activity [GO:0070006]; peptide binding [GO:004…	aminopeptidase activity [GO:0004177]; metalloaminopeptidase activity [GO:0070006]; peptide binding [GO:0042277]; zinc ion binding [GO:0008270]	SUBCELLULAR LOCATION: Cell membrane {ECO:0000250}; Single-pass type II membrane protein {ECO:0000250}. Endomembrane system {ECO:0000250}; Single-pass type II membrane protein {ECO:0000250}. Note=Localized mainly in intracellular vesicles together with GLUT4. Relocalizes to the plasma membrane in response to insulin. The dileucine internalization motif and/or the interaction with tankyrases may be…	9	6	9	10	5	8
P24527	LKHA4_MOUSE	Leukotriene A-4 hydrolase (LTA-4 hydrolase) (EC 3.3.2.6) (Leukotriene A(4) hydrolase) (Tripeptide aminopeptidase LTA4H) (EC 3.4.11.4)	Lta4h	0	0.974319	0.516041	0	leukotriene biosynthetic process [GO:0019370]; leukotriene metabolic process [GO:0006691]; peptide catabolic process [GO:0043171]; protein metabolic process [GO:0019538]; proteolysis [GO:0006508]; response to peptide hormone [GO:0043434]; response to zinc ion [GO:0010043]; type I pneumocyte differentiation [GO:0060509]	cytosol [GO:0005829]; nucleoplasm [GO:0005654]; nucleus [GO:0005634]	cytosol [GO:0005829]; nucleoplasm [GO:0005654]; nucleus [GO:0005634]; aminopeptidase activity [GO:0004177]; epoxide hydrolase activity [GO:0004301]; leukotriene-A4 hydrolase activity [GO:0004463]; metalloaminopeptidase activity [GO:0070006]; tripeptide aminopeptidase activity [GO:0045148]; zinc ion binding [GO:0008270]; leukotriene biosynthetic process [GO:0019370]; leukotriene metabolic process …	aminopeptidase activity [GO:0004177]; epoxide hydrolase activity [GO:0004301]; leukotriene-A4 hydrolase activity [GO:0004463]; metalloaminopeptidase activity [GO:0070006]; tripeptide aminopeptidase activity [GO:0045148]; zinc ion binding [GO:0008270]	SUBCELLULAR LOCATION: Cytoplasm {ECO:0000250|UniProtKB:P09960}.	7	6	7	7	6	6
P27046	MA2A1_MOUSE	Alpha-mannosidase 2 (EC 3.2.1.114) (Golgi alpha-mannosidase II) (AMan II) (Man II) (Mannosidase alpha class 2A member 1) (Mannosyl-oligosaccharide 1,3-1,6-alpha-mannosidase)	Man2a1	1	0.174692	0.101835	0	in utero embryonic development [GO:0001701]; liver development [GO:0001889]; lung alveolus development [GO:0048286]; mannose metabolic process [GO:0006013]; mitochondrion organization [GO:0007005]; N-glycan processing [GO:0006491]; positive regulation of neurogenesis [GO:0050769]; protein glycosylation [GO:0006486]; respiratory gaseous exchange by respiratory system [GO:0007585]; retina morphogen…	cis-Golgi network [GO:0005801]; extracellular space [GO:0005615]; Golgi apparatus [GO:0005794]; Golgi medial cisterna [GO:0005797]; Golgi membrane [GO:0000139]	cis-Golgi network [GO:0005801]; extracellular space [GO:0005615]; Golgi apparatus [GO:0005794]; Golgi medial cisterna [GO:0005797]; Golgi membrane [GO:0000139]; alpha-mannosidase activity [GO:0004559]; carbohydrate binding [GO:0030246]; hydrolase activity [GO:0016787]; hydrolase activity, hydrolyzing N-glycosyl compounds [GO:0016799]; identical protein binding [GO:0042802]; mannosidase activity […	alpha-mannosidase activity [GO:0004559]; carbohydrate binding [GO:0030246]; hydrolase activity [GO:0016787]; hydrolase activity, hydrolyzing N-glycosyl compounds [GO:0016799]; identical protein binding [GO:0042802]; mannosidase activity [GO:0015923]; mannosyl-oligosaccharide 1,3-1,6-alpha-mannosidase activity [GO:0004572]; metal ion binding [GO:0046872]; protein homodimerization activity [GO:0042…	SUBCELLULAR LOCATION: Golgi apparatus membrane; Single-pass type II membrane protein.	18	14	14	14	15	12
O09159	MA2B1_MOUSE	Lysosomal alpha-mannosidase (Laman) (EC 3.2.1.24) (Lysosomal acid alpha-mannosidase) (Mannosidase alpha class 2B member 1) (Mannosidase alpha-B)	Man2b1	0	1.61899	0.380234	0	learning or memory [GO:0007611]; mannose metabolic process [GO:0006013]; oligosaccharide catabolic process [GO:0009313]; protein modification process [GO:0036211]	extracellular space [GO:0005615]; intracellular membrane-bounded organelle [GO:0043231]; lysosomal lumen [GO:0043202]; lysosome [GO:0005764]; nucleoplasm [GO:0005654]	extracellular space [GO:0005615]; intracellular membrane-bounded organelle [GO:0043231]; lysosomal lumen [GO:0043202]; lysosome [GO:0005764]; nucleoplasm [GO:0005654]; alpha-mannosidase activity [GO:0004559]; mannose binding [GO:0005537]; metal ion binding [GO:0046872]; learning or memory [GO:0007611]; mannose metabolic process [GO:0006013]; oligosaccharide catabolic process [GO:0009313]; protein…	alpha-mannosidase activity [GO:0004559]; mannose binding [GO:0005537]; metal ion binding [GO:0046872]	SUBCELLULAR LOCATION: Lysosome.	11	11	10	9	10	6
O54782	MA2B2_MOUSE	Epididymis-specific alpha-mannosidase (EC 3.2.1.24) (Mannosidase alpha class 2B member 2)	Man2b2	0	0.431	1.833	0	mannose metabolic process [GO:0006013]; oligosaccharide catabolic process [GO:0009313]	extracellular region [GO:0005576]; lysosomal lumen [GO:0043202]; lysosome [GO:0005764]	extracellular region [GO:0005576]; lysosomal lumen [GO:0043202]; lysosome [GO:0005764]; alpha-mannosidase activity [GO:0004559]; carbohydrate binding [GO:0030246]; mannan endo-1,6-alpha-mannosidase activity [GO:0008496]; metal ion binding [GO:0046872]; mannose metabolic process [GO:0006013]; oligosaccharide catabolic process [GO:0009313]	alpha-mannosidase activity [GO:0004559]; carbohydrate binding [GO:0030246]; mannan endo-1,6-alpha-mannosidase activity [GO:0008496]; metal ion binding [GO:0046872]	SUBCELLULAR LOCATION: Secreted.	2	1	0	2	2	2
E9PYM7	E9PYM7_MOUSE	Mannosidase, alpha, class 2C, member 1	Man2c1	0	2.95865	1.61346	0	mannose metabolic process [GO:0006013]		alpha-mannosidase activity [GO:0004559]; carbohydrate binding [GO:0030246]; metal ion binding [GO:0046872]; mannose metabolic process [GO:0006013]	alpha-mannosidase activity [GO:0004559]; carbohydrate binding [GO:0030246]; metal ion binding [GO:0046872]		1	0	0	1	1	2
Q7TQE7	MACA2_MOUSE	Putative tyrosine carboxypeptidase MATCAP2 (EC 3.4.17.-)	Matcap2	0	0.0386861	0.0923888	0	proteolysis [GO:0006508]		carboxypeptidase activity [GO:0004180]; metal ion binding [GO:0046872]; metallopeptidase activity [GO:0008237]; proteolysis [GO:0006508]	carboxypeptidase activity [GO:0004180]; metal ion binding [GO:0046872]; metallopeptidase activity [GO:0008237]		1	2	1	2	2	0
Q61391	NEP_MOUSE	Neprilysin (EC 3.4.24.11) (Atriopeptidase) (Enkephalinase) (Neutral endopeptidase 24.11) (NEP) (Neutral endopeptidase) (Skin fibroblast elastase) (SFE) (CD antigen CD10)	Mme	1	0.117399	0.053854	0	amyloid-beta clearance [GO:0097242]; amyloid-beta clearance by cellular catabolic process [GO:0150094]; amyloid-beta metabolic process [GO:0050435]; bradykinin catabolic process [GO:0010815]; cellular response to cytokine stimulus [GO:0071345]; cellular response to UV-A [GO:0071492]; cellular response to UV-B [GO:0071493]; creatinine metabolic process [GO:0046449]; hormone catabolic process [GO:0…	axon [GO:0030424]; brush border [GO:0005903]; cytoplasm [GO:0005737]; cytoplasmic vesicle [GO:0031410]; dendrite [GO:0030425]; early endosome [GO:0005769]; membrane [GO:0016020]; membrane raft [GO:0045121]; neuron projection terminus [GO:0044306]; neuronal cell body [GO:0043025]; plasma membrane [GO:0005886]; presynapse [GO:0098793]; synapse [GO:0045202]; synaptic vesicle [GO:0008021]; trans-Golg…	axon [GO:0030424]; brush border [GO:0005903]; cytoplasm [GO:0005737]; cytoplasmic vesicle [GO:0031410]; dendrite [GO:0030425]; early endosome [GO:0005769]; membrane [GO:0016020]; membrane raft [GO:0045121]; neuron projection terminus [GO:0044306]; neuronal cell body [GO:0043025]; plasma membrane [GO:0005886]; presynapse [GO:0098793]; synapse [GO:0045202]; synaptic vesicle [GO:0008021]; trans-Golg…	cardiolipin binding [GO:1901612]; endopeptidase activity [GO:0004175]; exopeptidase activity [GO:0008238]; metalloendopeptidase activity [GO:0004222]; oligopeptidase activity [GO:0070012]; peptidase activity [GO:0008233]; peptide binding [GO:0042277]; phosphatidylserine binding [GO:0001786]; protein homodimerization activity [GO:0042803]; zinc ion binding [GO:0008270]	SUBCELLULAR LOCATION: Cell membrane {ECO:0000250|UniProtKB:P08473}; Single-pass type II membrane protein {ECO:0000255}.	9	5	11	6	9	5
P00397	COX1_MOUSE	Cytochrome c oxidase subunit 1 (EC 7.1.1.9) (Cytochrome c oxidase polypeptide I)	Mtco1	12	1.94914	0.342887	0	cerebellum development [GO:0021549]; electron transport coupled proton transport [GO:0015990]; mitochondrial electron transport, cytochrome c to oxygen [GO:0006123]; response to copper ion [GO:0046688]; response to electrical stimulus [GO:0051602]; response to hypoxia [GO:0001666]; response to oxidative stress [GO:0006979]	mitochondrial inner membrane [GO:0005743]; mitochondrial membrane [GO:0031966]; mitochondrial respiratory chain complex III [GO:0005750]; mitochondrial respiratory chain complex IV [GO:0005751]; mitochondrion [GO:0005739]; respiratory chain complex IV [GO:0045277]	mitochondrial inner membrane [GO:0005743]; mitochondrial membrane [GO:0031966]; mitochondrial respiratory chain complex III [GO:0005750]; mitochondrial respiratory chain complex IV [GO:0005751]; mitochondrion [GO:0005739]; respiratory chain complex IV [GO:0045277]; cytochrome-c oxidase activity [GO:0004129]; heme binding [GO:0020037]; metal ion binding [GO:0046872]; cerebellum development [GO:002…	cytochrome-c oxidase activity [GO:0004129]; heme binding [GO:0020037]; metal ion binding [GO:0046872]	SUBCELLULAR LOCATION: Mitochondrion inner membrane {ECO:0000250|UniProtKB:P00396}; Multi-pass membrane protein {ECO:0000250|UniProtKB:P00396}.	3	2	2	3	3	2
Q6NSR8	PEPL1_MOUSE	Probable aminopeptidase NPEPL1 (EC 3.4.11.-) (Aminopeptidase-like 1)	Npepl1	0	0.442846	0.160021	0	proteolysis [GO:0006508]	cytoplasm [GO:0005737]	cytoplasm [GO:0005737]; manganese ion binding [GO:0030145]; metalloaminopeptidase activity [GO:0070006]; peptidase activity [GO:0008233]; proteolysis [GO:0006508]	manganese ion binding [GO:0030145]; metalloaminopeptidase activity [GO:0070006]; peptidase activity [GO:0008233]		13	13	9	12	11	12
Q62443	NPTX1_MOUSE	Neuronal pentraxin-1 (NP1) (Neuronal pentraxin I) (NP-I)	Nptx1	0	2.67354	2.01974	0	axonogenesis involved in innervation [GO:0060385]; cellular response to glucose stimulus [GO:0071333]; cellular response to potassium ion [GO:0035865]; mitochondrial fragmentation involved in apoptotic process [GO:0043653]; mitochondrial transport [GO:0006839]; neurotransmitter receptor localization to postsynaptic specialization membrane [GO:0099645]; postsynaptic density assembly [GO:0097107]	endoplasmic reticulum [GO:0005783]; glutamatergic synapse [GO:0098978]; synaptic cleft [GO:0043083]; transport vesicle [GO:0030133]	endoplasmic reticulum [GO:0005783]; glutamatergic synapse [GO:0098978]; synaptic cleft [GO:0043083]; transport vesicle [GO:0030133]; metal ion binding [GO:0046872]; axonogenesis involved in innervation [GO:0060385]; cellular response to glucose stimulus [GO:0071333]; cellular response to potassium ion [GO:0035865]; mitochondrial fragmentation involved in apoptotic process [GO:0043653]; mitochondr…	metal ion binding [GO:0046872]	SUBCELLULAR LOCATION: Secreted {ECO:0000250|UniProtKB:Q15818}. Cytoplasmic vesicle, secretory vesicle {ECO:0000305}. Endoplasmic reticulum {ECO:0000305}.	0	2	2	4	5	4
Q9D720	NSE1_MOUSE	Non-structural maintenance of chromosomes element 1 homolog (Non-SMC element 1 homolog) (EC 2.3.2.27)	Nsmce1	0	0.000237987	0.000223796	0	DNA damage response [GO:0006974]; double-strand break repair via homologous recombination [GO:0000724]	chromosome, centromeric region [GO:0000775]; chromosome, telomeric region [GO:0000781]; intracellular membrane-bounded organelle [GO:0043231]; mitotic spindle pole [GO:0097431]; nucleoplasm [GO:0005654]; nucleus [GO:0005634]; Smc5-Smc6 complex [GO:0030915]	chromosome, centromeric region [GO:0000775]; chromosome, telomeric region [GO:0000781]; intracellular membrane-bounded organelle [GO:0043231]; mitotic spindle pole [GO:0097431]; nucleoplasm [GO:0005654]; nucleus [GO:0005634]; Smc5-Smc6 complex [GO:0030915]; metal ion binding [GO:0046872]; protein dimerization activity [GO:0046983]; ubiquitin protein ligase activity [GO:0061630]; ubiquitin-protein…	metal ion binding [GO:0046872]; protein dimerization activity [GO:0046983]; ubiquitin protein ligase activity [GO:0061630]; ubiquitin-protein transferase activity [GO:0004842]	SUBCELLULAR LOCATION: Nucleus {ECO:0000250|UniProtKB:Q8WV22}. Chromosome, telomere {ECO:0000250|UniProtKB:Q8WV22}.	4	4	3	2	3	2
O55022	PGRC1_MOUSE	Membrane-associated progesterone receptor component 1 (mPR)	Pgrmc1	1	0.258282	0.107918	0	associative learning [GO:0008306]; axon guidance [GO:0007411]; heme biosynthetic process [GO:0006783]; memory [GO:0007613]; modification of synaptic structure [GO:0099563]; negative regulation of synapse organization [GO:1905809]; positive regulation of lipoprotein transport [GO:0140077]; positive regulation of protein localization to plasma membrane [GO:1903078]	cell body [GO:0044297]; endomembrane system [GO:0012505]; endoplasmic reticulum [GO:0005783]; endoplasmic reticulum membrane [GO:0005789]; extracellular region [GO:0005576]; membrane [GO:0016020]; mitochondrial outer membrane [GO:0005741]; neuron projection [GO:0043005]; neuronal cell body [GO:0043025]; synapse [GO:0045202]	cell body [GO:0044297]; endomembrane system [GO:0012505]; endoplasmic reticulum [GO:0005783]; endoplasmic reticulum membrane [GO:0005789]; extracellular region [GO:0005576]; membrane [GO:0016020]; mitochondrial outer membrane [GO:0005741]; neuron projection [GO:0043005]; neuronal cell body [GO:0043025]; synapse [GO:0045202]; heme binding [GO:0020037]; metal ion binding [GO:0046872]; protein homod…	heme binding [GO:0020037]; metal ion binding [GO:0046872]; protein homodimerization activity [GO:0042803]; steroid binding [GO:0005496]	SUBCELLULAR LOCATION: Microsome membrane {ECO:0000250|UniProtKB:Q95250}; Single-pass membrane protein {ECO:0000255}. Endoplasmic reticulum membrane {ECO:0000250|UniProtKB:O00264}; Single-pass membrane protein {ECO:0000255}. Mitochondrion outer membrane {ECO:0000269|PubMed:27599036}; Single-pass membrane protein {ECO:0000305}; Extracellular side {ECO:0000269|PubMed:27599036}. Secreted {ECO:0000250…	18	17	16	15	17	14
Q9CXT8	MPPB_MOUSE	Mitochondrial-processing peptidase subunit beta (EC 3.4.24.64) (Beta-MPP) (P-52)	Pmpcb	0	0.453834	-0.485064	0	protein processing [GO:0016485]; protein processing involved in protein targeting to mitochondrion [GO:0006627]	mitochondrial inner membrane [GO:0005743]; mitochondrial processing peptidase complex [GO:0017087]; mitochondrion [GO:0005739]	mitochondrial inner membrane [GO:0005743]; mitochondrial processing peptidase complex [GO:0017087]; mitochondrion [GO:0005739]; endopeptidase activity [GO:0004175]; metal ion binding [GO:0046872]; metalloendopeptidase activity [GO:0004222]; protein processing [GO:0016485]; protein processing involved in protein targeting to mitochondrion [GO:0006627]	endopeptidase activity [GO:0004175]; metal ion binding [GO:0046872]; metalloendopeptidase activity [GO:0004222]	SUBCELLULAR LOCATION: Mitochondrion matrix {ECO:0000250|UniProtKB:O75439}.	6	5	2	3	2	2
Q62086	PON2_MOUSE	Serum paraoxonase/arylesterase 2 (PON 2) (EC 3.1.1.2) (EC 3.1.1.81) (Aromatic esterase 2) (A-esterase 2) (Serum aryldialkylphosphatase 2)	Pon2	0	0.432506	0.678947	0	aromatic compound catabolic process [GO:0019439]; response to toxic substance [GO:0009636]	extracellular region [GO:0005576]; plasma membrane [GO:0005886]	extracellular region [GO:0005576]; plasma membrane [GO:0005886]; acyl-L-homoserine-lactone lactonohydrolase activity [GO:0102007]; arylesterase activity [GO:0004064]; identical protein binding [GO:0042802]; metal ion binding [GO:0046872]; aromatic compound catabolic process [GO:0019439]; response to toxic substance [GO:0009636]	acyl-L-homoserine-lactone lactonohydrolase activity [GO:0102007]; arylesterase activity [GO:0004064]; identical protein binding [GO:0042802]; metal ion binding [GO:0046872]	SUBCELLULAR LOCATION: Membrane {ECO:0000250}; Peripheral membrane protein {ECO:0000250}.	10	7	8	8	7	6
Q62087	PON3_MOUSE	Serum paraoxonase/lactonase 3 (EC 3.1.1.2) (EC 3.1.1.81) (EC 3.1.8.1)	Pon3	0	0.431978	-0.106098	0	aromatic compound catabolic process [GO:0019439]; carboxylic acid catabolic process [GO:0046395]; coumarin catabolic process [GO:0046226]; establishment of localization in cell [GO:0051649]; negative regulation of superoxide anion generation [GO:0032929]; phenylacetate catabolic process [GO:0010124]; renal sodium ion transport [GO:0003096]; response to toxic substance [GO:0009636]	extracellular space [GO:0005615]	extracellular space [GO:0005615]; 3,4-dihydrocoumarin hydrolase activity [GO:0018733]; acyl-L-homoserine-lactone lactonohydrolase activity [GO:0102007]; aryldialkylphosphatase activity [GO:0004063]; arylesterase activity [GO:0004064]; metal ion binding [GO:0046872]; protein homodimerization activity [GO:0042803]; aromatic compound catabolic process [GO:0019439]; carboxylic acid catabolic process …	3,4-dihydrocoumarin hydrolase activity [GO:0018733]; acyl-L-homoserine-lactone lactonohydrolase activity [GO:0102007]; aryldialkylphosphatase activity [GO:0004063]; arylesterase activity [GO:0004064]; metal ion binding [GO:0046872]; protein homodimerization activity [GO:0042803]	SUBCELLULAR LOCATION: Secreted, extracellular space {ECO:0000250}.	13	12	12	10	11	10
P62137	PP1A_MOUSE	Serine/threonine-protein phosphatase PP1-alpha catalytic subunit (PP-1A) (EC 3.1.3.16)	Ppp1ca	0	1.37206	0.38459	0	branching morphogenesis of an epithelial tube [GO:0048754]; cell cycle [GO:0007049]; cell division [GO:0051301]; circadian regulation of gene expression [GO:0032922]; dephosphorylation [GO:0016311]; entrainment of circadian clock by photoperiod [GO:0043153]; glycogen metabolic process [GO:0005977]; lung development [GO:0030324]; positive regulation of extrinsic apoptotic signaling pathway in abse…	adherens junction [GO:0005912]; chromosome, telomeric region [GO:0000781]; cytoplasm [GO:0005737]; cytosol [GO:0005829]; dendritic spine [GO:0043197]; glutamatergic synapse [GO:0098978]; glycogen granule [GO:0042587]; neuronal cell body [GO:0043025]; nucleolus [GO:0005730]; nucleoplasm [GO:0005654]; nucleus [GO:0005634]; perikaryon [GO:0043204]; plasma membrane [GO:0005886]; postsynapse [GO:00987…	adherens junction [GO:0005912]; chromosome, telomeric region [GO:0000781]; cytoplasm [GO:0005737]; cytosol [GO:0005829]; dendritic spine [GO:0043197]; glutamatergic synapse [GO:0098978]; glycogen granule [GO:0042587]; neuronal cell body [GO:0043025]; nucleolus [GO:0005730]; nucleoplasm [GO:0005654]; nucleus [GO:0005634]; perikaryon [GO:0043204]; plasma membrane [GO:0005886]; postsynapse [GO:00987…	cadherin binding involved in cell-cell adhesion [GO:0098641]; metal ion binding [GO:0046872]; myosin phosphatase activity [GO:0017018]; phosphatase activity [GO:0016791]; phosphoprotein phosphatase activity [GO:0004721]; protein phosphatase 1 binding [GO:0008157]; protein serine/threonine phosphatase activity [GO:0004722]; protein-containing complex binding [GO:0044877]; ribonucleoprotein complex…	SUBCELLULAR LOCATION: Cytoplasm {ECO:0000250}. Nucleus {ECO:0000250}. Nucleus, nucleoplasm {ECO:0000250}. Nucleus, nucleolus {ECO:0000250}. Note=Primarily nuclear and largely excluded from the nucleolus. Highly mobile in cells and can be relocalized through interaction with targeting subunits. NOM1 plays a role in targeting this protein to the nucleolus. In the presence of PPP1R8 relocalizes from…	5	5	4	5	5	3
P63330	PP2AA_MOUSE	Serine/threonine-protein phosphatase 2A catalytic subunit alpha isoform (PP2A-alpha) (EC 3.1.3.16)	Ppp2ca	0	1.55421	0.343228	0	meiotic cell cycle [GO:0051321]; mesoderm development [GO:0007498]; mitotic cell cycle [GO:0000278]; negative regulation of epithelial to mesenchymal transition [GO:0010719]; negative regulation of glycolytic process through fructose-6-phosphate [GO:1904539]; negative regulation of phosphatidylinositol 3-kinase/protein kinase B signal transduction [GO:0051898]; positive regulation of glycolytic p…	chromosome, centromeric region [GO:0000775]; cytoplasm [GO:0005737]; cytosol [GO:0005829]; membrane raft [GO:0045121]; nucleus [GO:0005634]; plasma membrane [GO:0005886]; protein phosphatase type 2A complex [GO:0000159]; spindle pole [GO:0000922]; synapse [GO:0045202]; terminal bouton [GO:0043195]	chromosome, centromeric region [GO:0000775]; cytoplasm [GO:0005737]; cytosol [GO:0005829]; membrane raft [GO:0045121]; nucleus [GO:0005634]; plasma membrane [GO:0005886]; protein phosphatase type 2A complex [GO:0000159]; spindle pole [GO:0000922]; synapse [GO:0045202]; terminal bouton [GO:0043195]; beta-2 adrenergic receptor binding [GO:0031698]; enzyme binding [GO:0019899]; GABA receptor binding…	beta-2 adrenergic receptor binding [GO:0031698]; enzyme binding [GO:0019899]; GABA receptor binding [GO:0050811]; identical protein binding [GO:0042802]; metal ion binding [GO:0046872]; myosin phosphatase activity [GO:0017018]; protein antigen binding [GO:1990405]; protein domain specific binding [GO:0019904]; protein heterodimerization activity [GO:0046982]; protein kinase B binding [GO:0043422]…	SUBCELLULAR LOCATION: Cytoplasm {ECO:0000269|PubMed:18084284}. Nucleus {ECO:0000250|UniProtKB:P67775}. Chromosome, centromere {ECO:0000269|PubMed:18084284}. Cytoplasm, cytoskeleton, spindle pole {ECO:0000250|UniProtKB:P67775}. Note=In prometaphase cells, but not in anaphase cells, localizes at centromeres (By similarity). During mitosis, also found at spindle poles (By similarity). Centromeric lo…	3	2	2	1	2	1
O35593	PSDE_MOUSE	26S proteasome non-ATPase regulatory subunit 14 (EC 3.4.19.-) (26S proteasome regulatory subunit RPN11) (MAD1)	Psmd14	0	2.14439	0.861938	0	double-strand break repair via homologous recombination [GO:0000724]; double-strand break repair via nonhomologous end joining [GO:0006303]; proteasome-mediated ubiquitin-dependent protein catabolic process [GO:0043161]; protein K63-linked deubiquitination [GO:0070536]; regulation of proteasomal protein catabolic process [GO:0061136]; response to ethanol [GO:0045471]	cytosolic proteasome complex [GO:0031597]; proteasome accessory complex [GO:0022624]; proteasome complex [GO:0000502]; proteasome regulatory particle, lid subcomplex [GO:0008541]	cytosolic proteasome complex [GO:0031597]; proteasome accessory complex [GO:0022624]; proteasome complex [GO:0000502]; proteasome regulatory particle, lid subcomplex [GO:0008541]; endopeptidase activator activity [GO:0061133]; endopeptidase activity [GO:0004175]; metal ion binding [GO:0046872]; metal-dependent deubiquitinase activity [GO:0140492]; metallopeptidase activity [GO:0008237]; proteasom…	endopeptidase activator activity [GO:0061133]; endopeptidase activity [GO:0004175]; metal ion binding [GO:0046872]; metal-dependent deubiquitinase activity [GO:0140492]; metallopeptidase activity [GO:0008237]; proteasome binding [GO:0070628]		2	3	2	3	3	3
P26516	PSMD7_MOUSE	26S proteasome non-ATPase regulatory subunit 7 (26S proteasome regulatory subunit RPN8) (26S proteasome regulatory subunit S12) (Mov34 protein) (Proteasome subunit p40)	Psmd7	0	1.45714	0.537496	0	proteasome-mediated ubiquitin-dependent protein catabolic process [GO:0043161]	nucleoplasm [GO:0005654]; proteasome complex [GO:0000502]; proteasome regulatory particle [GO:0005838]	nucleoplasm [GO:0005654]; proteasome complex [GO:0000502]; proteasome regulatory particle [GO:0005838]; metallopeptidase activity [GO:0008237]; protein homodimerization activity [GO:0042803]; proteasome-mediated ubiquitin-dependent protein catabolic process [GO:0043161]	metallopeptidase activity [GO:0008237]; protein homodimerization activity [GO:0042803]		9	10	10	9	7	8
P22437	PGH1_MOUSE	Prostaglandin G/H synthase 1 (EC 1.14.99.1) (Cyclooxygenase-1) (COX-1) (Prostaglandin H2 synthase 1) (PGH synthase 1) (PGHS-1) (PHS 1) (Prostaglandin-endoperoxide synthase 1)	Ptgs1	0	0.628804	0.614826	0	cyclooxygenase pathway [GO:0019371]; keratinocyte differentiation [GO:0030216]; learning [GO:0007612]; maintenance of blood-brain barrier [GO:0035633]; memory [GO:0007613]; negative regulation of epinephrine secretion [GO:0032811]; negative regulation of norepinephrine secretion [GO:0010700]; positive regulation of smooth muscle contraction [GO:0045987]; positive regulation of vasoconstriction [G…	cytoplasm [GO:0005737]; endoplasmic reticulum membrane [GO:0005789]; Golgi apparatus [GO:0005794]; intracellular membrane-bounded organelle [GO:0043231]; neuron projection [GO:0043005]; nuclear envelope [GO:0005635]; photoreceptor outer segment [GO:0001750]	cytoplasm [GO:0005737]; endoplasmic reticulum membrane [GO:0005789]; Golgi apparatus [GO:0005794]; intracellular membrane-bounded organelle [GO:0043231]; neuron projection [GO:0043005]; nuclear envelope [GO:0005635]; photoreceptor outer segment [GO:0001750]; heme binding [GO:0020037]; metal ion binding [GO:0046872]; oxidoreductase activity, acting on single donors with incorporation of molecular …	heme binding [GO:0020037]; metal ion binding [GO:0046872]; oxidoreductase activity, acting on single donors with incorporation of molecular oxygen, incorporation of two atoms of oxygen [GO:0016702]; peroxidase activity [GO:0004601]; prostaglandin-endoperoxide synthase activity [GO:0004666]	SUBCELLULAR LOCATION: Microsome membrane; Peripheral membrane protein. Endoplasmic reticulum membrane; Peripheral membrane protein.	1	0	2	1	2	1
P52760	RIDA_MOUSE	2-iminobutanoate/2-iminopropanoate deaminase (EC 3.5.99.10) (Heat-responsive protein 12) (Reactive intermediate imine deaminase A homolog) (Translation inhibitor L-PSP ribonuclease)	Rida	0	0.0529476	-0.0353826	0	lipid metabolic process [GO:0006629]; mRNA catabolic process [GO:0006402]; mRNA destabilization [GO:0061157]; negative regulation of epithelial cell proliferation [GO:0050680]; negative regulation of translation [GO:0017148]; organonitrogen compound catabolic process [GO:1901565]	cytoplasm [GO:0005737]; cytosol [GO:0005829]; mitochondrial matrix [GO:0005759]; mitochondrion [GO:0005739]; nucleus [GO:0005634]; peroxisome [GO:0005777]	cytoplasm [GO:0005737]; cytosol [GO:0005829]; mitochondrial matrix [GO:0005759]; mitochondrion [GO:0005739]; nucleus [GO:0005634]; peroxisome [GO:0005777]; 2-iminobutanoate deaminase activity [GO:0120242]; 2-iminopropanoate deaminase activity [GO:0120243]; deaminase activity [GO:0019239]; identical protein binding [GO:0042802]; ion binding [GO:0043167]; long-chain fatty acid binding [GO:0036041];…	2-iminobutanoate deaminase activity [GO:0120242]; 2-iminopropanoate deaminase activity [GO:0120243]; deaminase activity [GO:0019239]; identical protein binding [GO:0042802]; ion binding [GO:0043167]; long-chain fatty acid binding [GO:0036041]; mRNA binding [GO:0003729]; RNA endonuclease activity, producing 3'-phosphomonoesters [GO:0016892]; transition metal ion binding [GO:0046914]	SUBCELLULAR LOCATION: Cytoplasm {ECO:0000250|UniProtKB:P52758}. Nucleus {ECO:0000250|UniProtKB:P52758}. Peroxisome {ECO:0000250|UniProtKB:P52759}. Mitochondrion {ECO:0000250|UniProtKB:P52759}. Note=Mostly cytoplasmic but, in less differentiated cells occasionally nuclear. {ECO:0000250|UniProtKB:P52758}.	3	4	2	1	2	1
Q8BP31	RN122_MOUSE	RING finger protein 122	Rnf122	1	2.15153	-0.794262	0	negative regulation of mitochondrial membrane potential [GO:0010917]; positive regulation of apoptotic process [GO:0043065]; proteasome-mediated ubiquitin-dependent protein catabolic process [GO:0043161]; protein autoubiquitination [GO:0051865]	cytoplasm [GO:0005737]; endoplasmic reticulum [GO:0005783]; Golgi apparatus [GO:0005794]; membrane [GO:0016020]	cytoplasm [GO:0005737]; endoplasmic reticulum [GO:0005783]; Golgi apparatus [GO:0005794]; membrane [GO:0016020]; metal ion binding [GO:0046872]; ubiquitin protein ligase activity [GO:0061630]; negative regulation of mitochondrial membrane potential [GO:0010917]; positive regulation of apoptotic process [GO:0043065]; proteasome-mediated ubiquitin-dependent protein catabolic process [GO:0043161]; p…	metal ion binding [GO:0046872]; ubiquitin protein ligase activity [GO:0061630]	SUBCELLULAR LOCATION: Golgi apparatus. Endoplasmic reticulum {ECO:0000250}. Membrane {ECO:0000305}; Single-pass membrane protein {ECO:0000305}.	1	1	1	2	1	1
Q99P72	RTN4_MOUSE	Reticulon-4 (Neurite outgrowth inhibitor) (Nogo protein)	Rtn4	3	0.983429	0.303153	0	axonal fasciculation [GO:0007413]; blastocyst formation [GO:0001825]; brain development [GO:0007420]; cardiac epithelial to mesenchymal transition [GO:0060317]; cell adhesion involved in sprouting angiogenesis [GO:0120078]; cell migration involved in vasculogenesis [GO:0035441]; cellular response to hypoxia [GO:0071456]; central nervous system vasculogenesis [GO:0022009]; cerebral cortex radial g…	anchoring junction [GO:0070161]; cell junction [GO:0030054]; cell projection [GO:0042995]; endoplasmic reticulum [GO:0005783]; endoplasmic reticulum membrane [GO:0005789]; endoplasmic reticulum tubular network [GO:0071782]; endoplasmic reticulum tubular network membrane [GO:0098826]; glutamatergic synapse [GO:0098978]; neuron projection [GO:0043005]; neuronal cell body [GO:0043025]; nuclear envel…	anchoring junction [GO:0070161]; cell junction [GO:0030054]; cell projection [GO:0042995]; endoplasmic reticulum [GO:0005783]; endoplasmic reticulum membrane [GO:0005789]; endoplasmic reticulum tubular network [GO:0071782]; endoplasmic reticulum tubular network membrane [GO:0098826]; glutamatergic synapse [GO:0098978]; neuron projection [GO:0043005]; neuronal cell body [GO:0043025]; nuclear envel…	cadherin binding [GO:0045296]; metal ion binding [GO:0046872]; protein homodimerization activity [GO:0042803]; protein-containing complex binding [GO:0044877]; ubiquitin protein ligase binding [GO:0031625]	SUBCELLULAR LOCATION: [Isoform A]: Endoplasmic reticulum membrane {ECO:0000269|PubMed:27786289, ECO:0000269|PubMed:32075961}; Multi-pass membrane protein {ECO:0000255}. Cell membrane {ECO:0000250|UniProtKB:Q9NQC3}; Multi-pass membrane protein {ECO:0000255}; Cytoplasmic side {ECO:0000250|UniProtKB:Q9NQC3}. Synapse {ECO:0000269|PubMed:35771867}. Note=Anchored to the membrane of the endoplasmic reti…	3	3	3	4	3	3
E9PYG9	E9PYG9_MOUSE	Deoxynucleoside triphosphate triphosphohydrolase SAMHD1	Samhd1	0	0.233808	-0.290898	0	defense response to virus [GO:0051607]; DNA repair [GO:0006281]; DNA replication [GO:0006260]	chromosome [GO:0005694]	chromosome [GO:0005694]; catalytic activity [GO:0003824]; metal ion binding [GO:0046872]; defense response to virus [GO:0051607]; DNA repair [GO:0006281]; DNA replication [GO:0006260]	catalytic activity [GO:0003824]; metal ion binding [GO:0046872]	SUBCELLULAR LOCATION: Chromosome {ECO:0000256|ARBA:ARBA00004286}.	3	2	2	1	2	2
Q60738	ZNT1_MOUSE	Proton-coupled zinc antiporter SLC30A1 (Solute carrier family 30 member 1) (Zinc transporter 1) (ZnT-1)	Slc30a1	6	0.970715	0.516296	0	cadmium ion transmembrane transport [GO:0070574]; calcium ion import [GO:0070509]; defense response to bacterium [GO:0042742]; detoxification of cadmium ion [GO:0071585]; detoxification of zinc ion [GO:0010312]; in utero embryonic development [GO:0001701]; intracellular calcium ion homeostasis [GO:0006874]; intracellular zinc ion homeostasis [GO:0006882]; negative regulation of calcium ion import…	basolateral plasma membrane [GO:0016323]; cytoplasm [GO:0005737]; cytoplasmic vesicle membrane [GO:0030659]; endoplasmic reticulum [GO:0005783]; Golgi apparatus [GO:0005794]; nuclear membrane [GO:0031965]; plasma membrane [GO:0005886]; postsynaptic density membrane [GO:0098839]; Schaffer collateral - CA1 synapse [GO:0098685]; T-tubule [GO:0030315]	basolateral plasma membrane [GO:0016323]; cytoplasm [GO:0005737]; cytoplasmic vesicle membrane [GO:0030659]; endoplasmic reticulum [GO:0005783]; Golgi apparatus [GO:0005794]; nuclear membrane [GO:0031965]; plasma membrane [GO:0005886]; postsynaptic density membrane [GO:0098839]; Schaffer collateral - CA1 synapse [GO:0098685]; T-tubule [GO:0030315]; calcium channel inhibitor activity [GO:0019855];…	calcium channel inhibitor activity [GO:0019855]; metal ion binding [GO:0046872]; zinc ion transmembrane transporter activity [GO:0005385]; zinc:proton antiporter activity [GO:0140826]	SUBCELLULAR LOCATION: Cell membrane {ECO:0000250|UniProtKB:Q62720}; Multi-pass membrane protein {ECO:0000255}. Basolateral cell membrane {ECO:0000250|UniProtKB:Q62720}; Multi-pass membrane protein {ECO:0000255}. Cytoplasmic vesicle membrane {ECO:0000250|UniProtKB:Q9Y6M5}; Multi-pass membrane protein {ECO:0000255}. Note=Localization to the plasma membrane is regulated by cellular zinc status. Recr…	4	3	5	4	5	3
A0A2U3TZ56	A0A2U3TZ56_MOUSE	Zinc transporter ZIP4 (Solute carrier family 39 member 4) (Zrt- and Irt-like protein 4)	Slc39a4	4	0.101652	0.163176	0		apical plasma membrane [GO:0016324]; recycling endosome membrane [GO:0055038]	apical plasma membrane [GO:0016324]; recycling endosome membrane [GO:0055038]; metal ion transmembrane transporter activity [GO:0046873]	metal ion transmembrane transporter activity [GO:0046873]	SUBCELLULAR LOCATION: Apical cell membrane {ECO:0000256|ARBA:ARBA00004424}; Multi-pass membrane protein {ECO:0000256|ARBA:ARBA00004424}. Cell membrane {ECO:0000256|ARBA:ARBA00004651}; Multi-pass membrane protein {ECO:0000256|ARBA:ARBA00004651}. Endosome membrane {ECO:0000256|ARBA:ARBA00004337}; Multi-pass membrane protein {ECO:0000256|ARBA:ARBA00004337}. Membrane {ECO:0000256|ARBA:ARBA00004141}; …	2	1	1	1	2	1
[truncated: 1,060 more rows]

## Sheet: ATP-VO4 56°C
Majority protein IDs	Entry Name	Protein names	Gene Names	TM	p-value (-log10)	Fold Difference (log2)	ATP-binding	Gene Ontology (biological process)	Gene Ontology (cellular component)	Gene Ontology (GO)	Gene Ontology (molecular function)	Subcellular location [CC]	Unique peptides 56.1 (-)	Unique peptides 56.2 (-)	Unique peptides 56.3 (-)	Unique peptides 56.1 (+)	Unique peptides 56.2 (+)	Unique peptides 56.3 (+)
[truncated: 1,179 more rows]

## Sheet: ATP-VO4 60°C
	Entry Name	Protein names	Gene Names	TM	p-value (-log10)	Fold Difference (log2)	ATP-binding	Gene Ontology (biological process)	Gene Ontology (cellular component)	Gene Ontology (GO)	Gene Ontology (molecular function)	Subcellular location [CC]	Unique peptides 60.1 (-)	Unique peptides 60.2 (-)	Unique peptides 60.3 (-)	Unique peptides 60.1 (+)	Unique peptides 60.2B (+)	Unique peptides 60.3 (+)
[truncated: 1,090 more rows]

[truncated: 18 more sheets: ATP-VO4 64°C, AMP-PNP 51°C, AMP-PNP 56°C, AMP-PNP 60°C, AMP-PNP 64°C, E.COLI RT, E.COLI 46°C, E.COLI 51°C, E.COLI 56°C, E.COLI 61°C, MOUSE LIVER GRADIENT, SP4_ATPVO4_51C_Volcano, SP4_ATPVO4_56C_Volcano, SP4_ATPVO4_60C_Volcano, SP4_ATPVO4_64_Volcano, 2-MeS-ADP_51_Volcano, 2-MeS-ADP_57_Volcano, DIA_ATPVO4]
